# Supplementary material for: Domino reaction of cyclic sulfamidate imines with Morita–Baylis–Hillman acetates promoted by DABCO: a metal-free approach to functionalized nicotinic acid derivatives
Source: Royal Society of Chemistry journal article supplement (doi:10.1039/c7ob00240h), 2017-01-01

## Supporting Information

### **Domino reaction of cyclic sulfamidate imines with Morita-Baylis-Hillman acetates promoted by DABCO: a metal-free approach to functionalized nicotinic acid derivatives**

Debashis Majee, Soumen Biswas, Shaikh M. Mobin and Sampak Samanta\*

Discipline of Chemistry, Indian Institute of Technology Indore, Simrol, 452553, India

**Crystallographic data:** Single crystal X-ray structural of **3ai** was collected at 150(2) K using graphite monochromated Mo K $\alpha$  radiation ( $\lambda = 0.71073$  Å). The strategy for the Data collection was evaluated by using the CrysAlisPro CCD software. The data were collected by the standard 'phi-omega scan techniques, and were scaled and reduced using CrysAlisPro RED software. The structure was solved by direct methods using SHELXS-97, and refined by full matrix least-squares with SHELXL-97, refining on  $F^2$ . The positions of all the atoms were obtained by direct methods. All non-hydrogen atoms were refined anisotropically. The remaining hydrogen atoms were placed in geometrically constrained positions, and refined with isotropic temperature factors, generally  $1.2U_{eq}$  of their parent atoms. The crystal data are summarized in Table 1. The CCDC number of **3ai** (**1522097**) can be obtained free of charge via [www.ccdc.cam.ac.uk](http://www.ccdc.cam.ac.uk) (or from the Cambridge Crystallographic Data Centre, 12 Union Road, Cambridge CB21 3EZ, UK; Fax: (+44) 1223-336-033; or [deposit@ccdc.cam.ac.uk](mailto:deposit@ccdc.cam.ac.uk)).

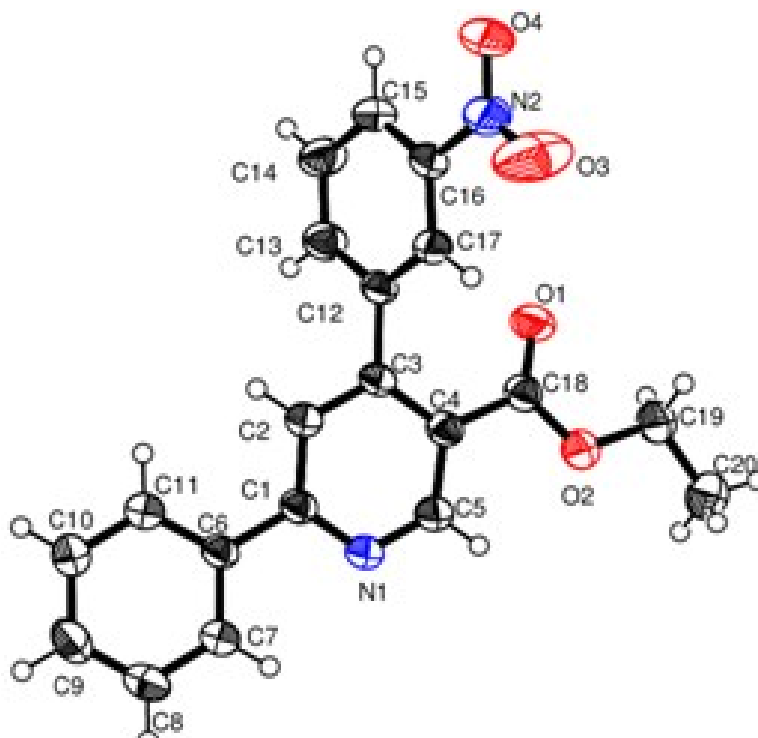

**Figure 1.** ORTEP diagram of compound **3ai** (CCDC 1522097), thermal ellipsoids drawn at the 50% probability level.

**Table 1. Crystal data for compound 3ai.**

|                                                  |                                                               |
|--------------------------------------------------|---------------------------------------------------------------|
| Compound                                         | <b>3ai</b>                                                    |
| Empirical formula                                | C <sub>20</sub> H <sub>16</sub> N <sub>2</sub> O <sub>4</sub> |
| Formula weight                                   | 348.35                                                        |
| Temperature                                      | 293(2) K                                                      |
| Wave length (Å)                                  | 0.71073 Å                                                     |
| Crystal system, space group                      | Triclinic, P-1                                                |
| <i>a</i> (Å)                                     | <i>a</i> = 8.1889(3) Å                                        |
| <i>b</i> (Å)                                     | <i>b</i> = 10.3419(5) Å                                       |
| <i>c</i> (Å)                                     | <i>c</i> = 10.9166(4) Å                                       |
| $\alpha$ (°)                                     | $\alpha$ = 105.058(4) deg.                                    |
| $\beta$ (°)                                      | $\beta$ = 98.466(3) deg.                                      |
| $\gamma$ (°)                                     | $\gamma$ = 99.563(3) deg.                                     |
| Volume (Å <sup>3</sup> )                         | 862.59(6) Å <sup>3</sup>                                      |
| Z, Calculated density (mg/m <sup>3</sup> )       | 2, 1.341 Mg/m <sup>3</sup>                                    |
| Absorption coefficient (mm <sup>-1</sup> )       | 0.095 mm <sup>-1</sup>                                        |
| F(000)                                           | 364                                                           |
| Crystal size (mm)                                | 0.230 x 0.180 x 0.130 mm                                      |
| $\Theta$ range (deg)                             | 2.947 to 32.231 deg.                                          |
| Limiting indices                                 | -12 ≤ <i>h</i> ≤ 12, -15 ≤ <i>k</i> ≤ 15, -15 ≤ <i>l</i> ≤ 16 |
| Reflections collected / unique                   | 10763 / 5548 [R(int) = 0.0262]                                |
| Completeness to $\Theta = 25.242$                | 99.8 %                                                        |
| Max. and min. transmission                       | 1.00000 and 0.77304                                           |
| Absorption correction                            | Semi-empirical from equivalents                               |
| Refined method                                   | Full-matrix least-squares on F <sup>2</sup>                   |
| Data / restraints / parameters                   | 5548 / 0 / 236                                                |
| Goodness-of-fit on F <sup>2</sup>                | 1.070                                                         |
| Final R indices [I > 2 $\sigma$ (I)]             | R1 = 0.0624, wR2 = 0.1619                                     |
| R indices (all data)                             | R1 = 0.0967, wR2 = 0.1867                                     |
| Largest diff. peak and hole (e.Å <sup>-3</sup> ) | 0.260 and -0.234 e.Å <sup>-3</sup>                            |
| <b>CCDC</b>                                      | <b>1522097</b>                                                |

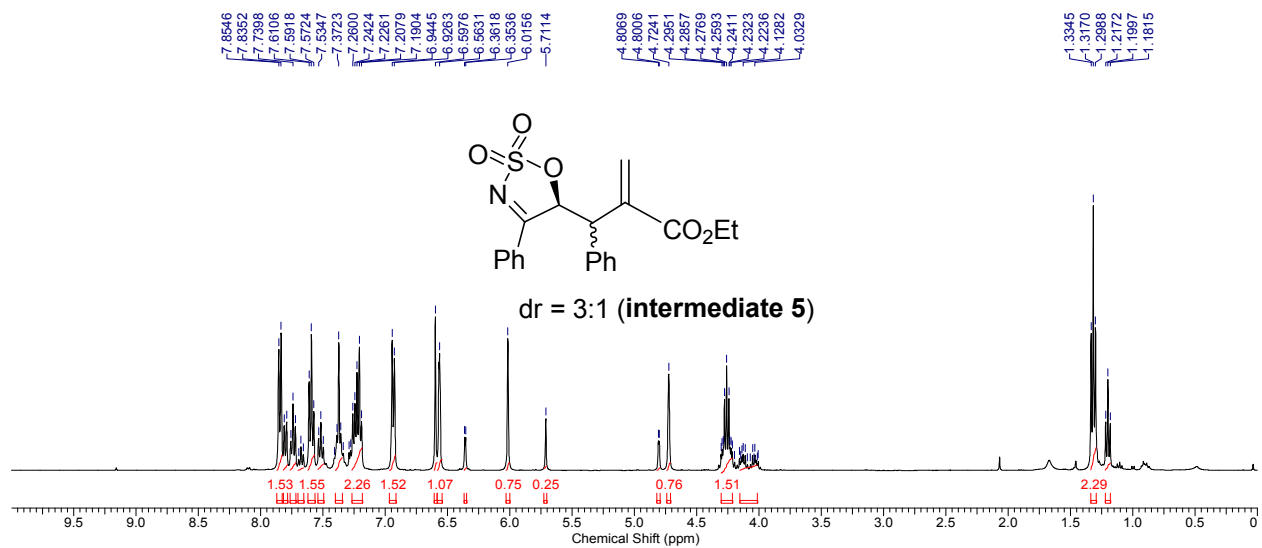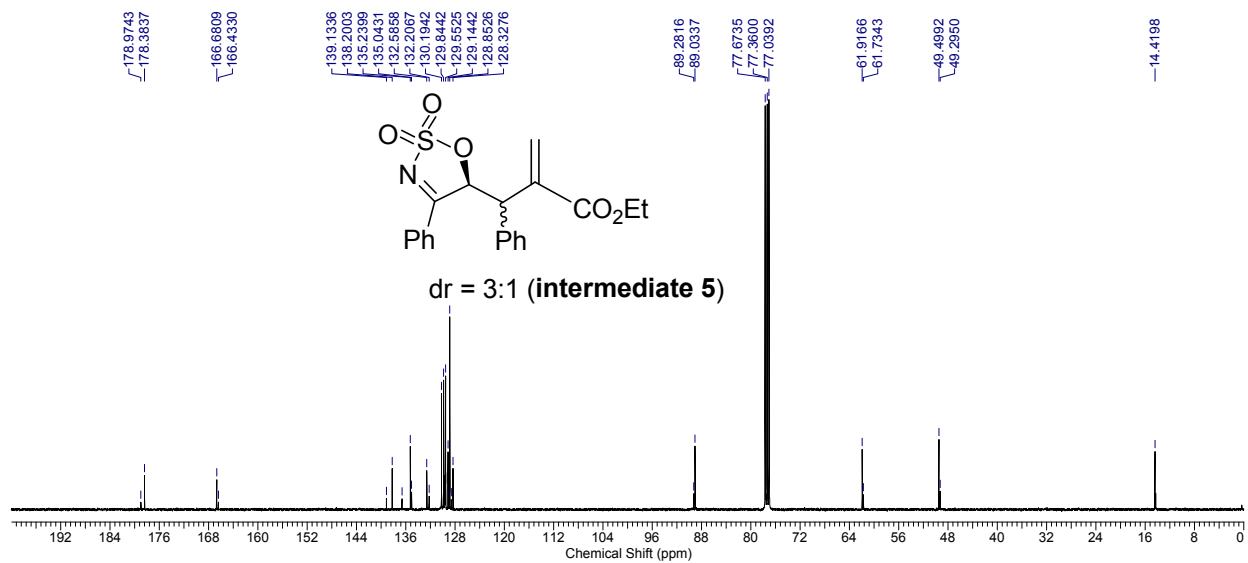

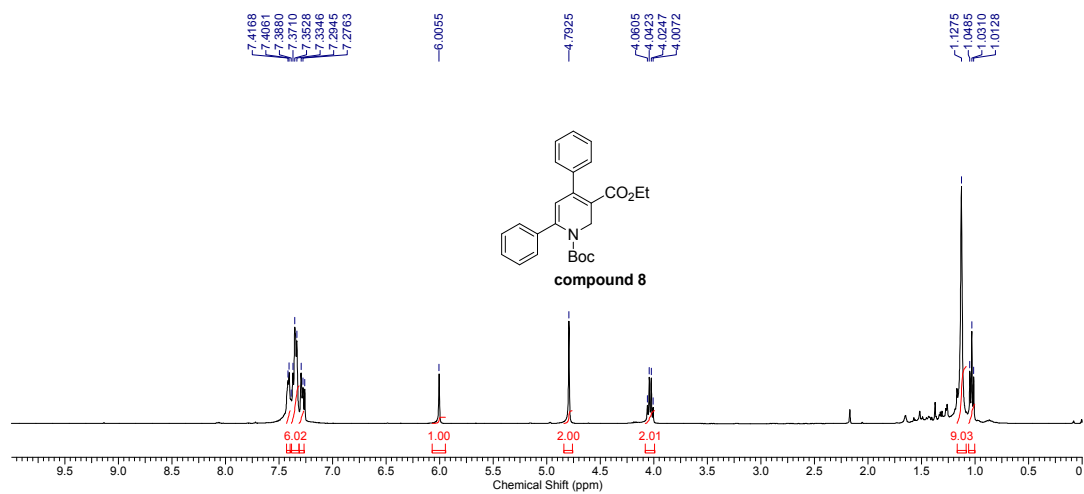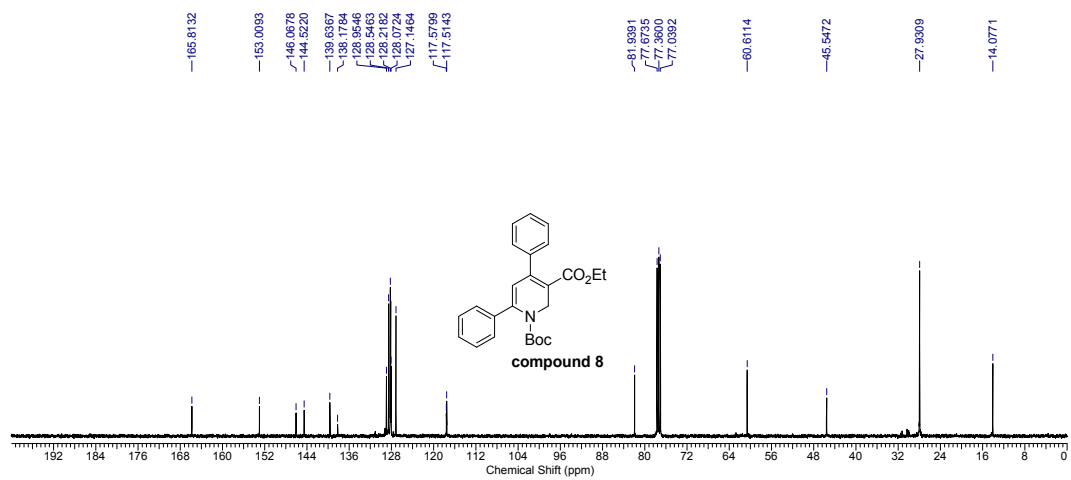

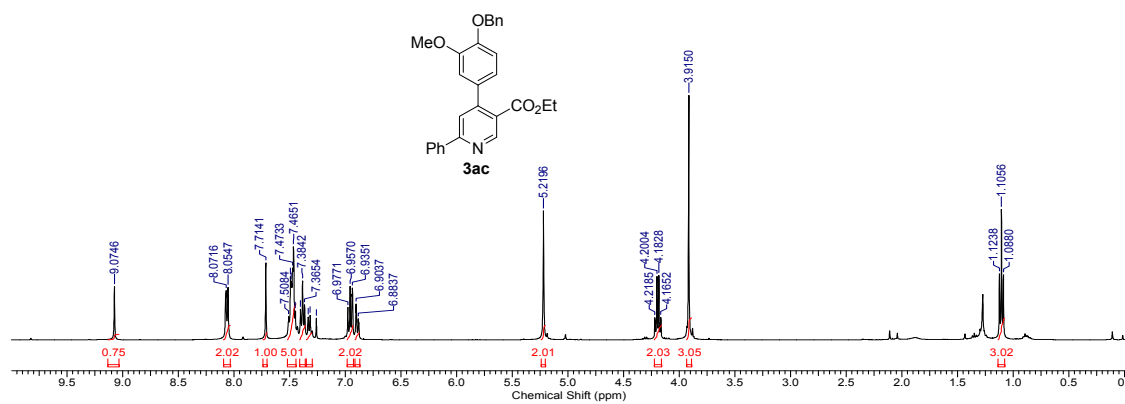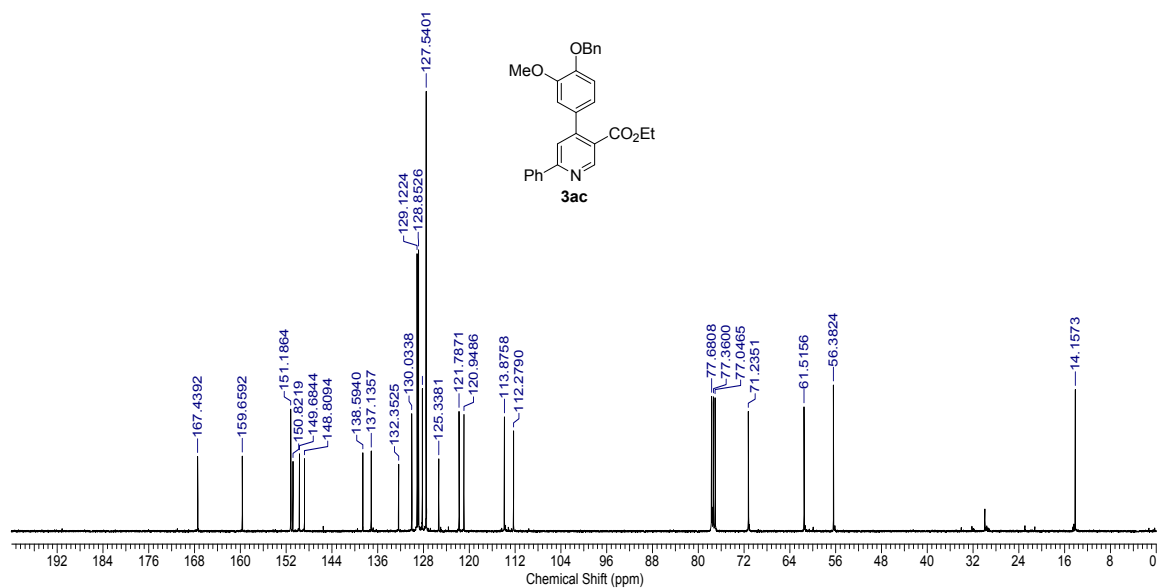

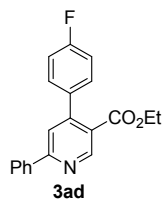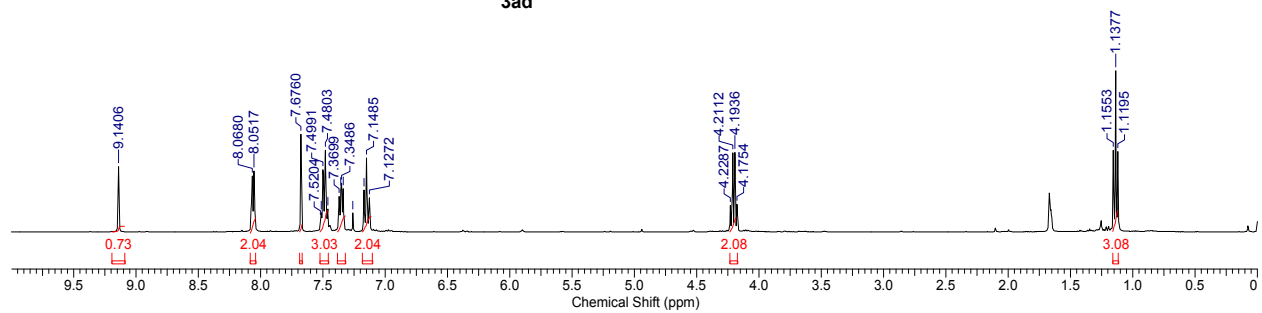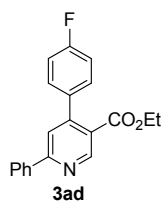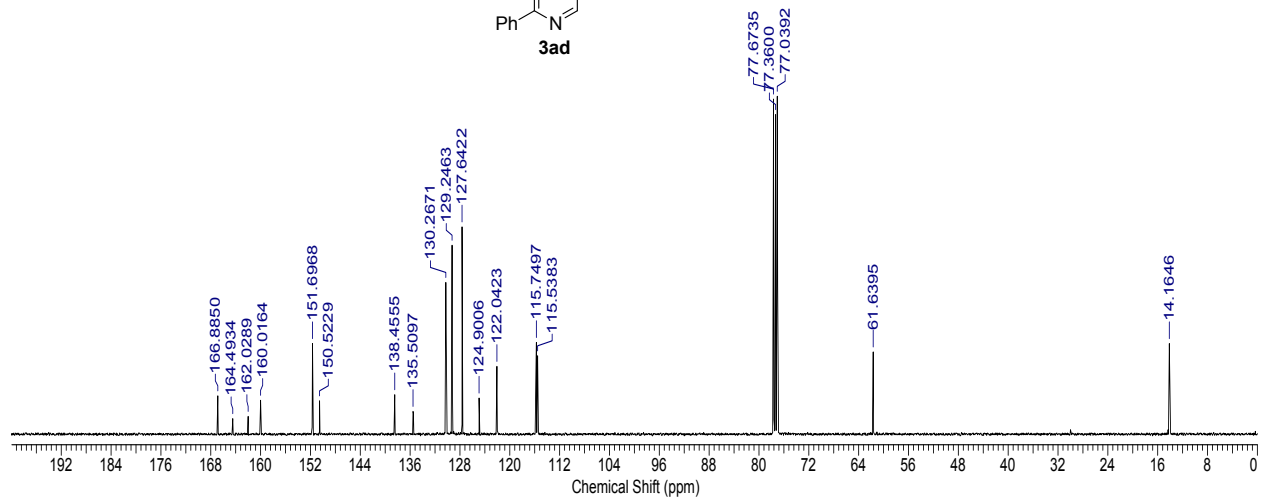

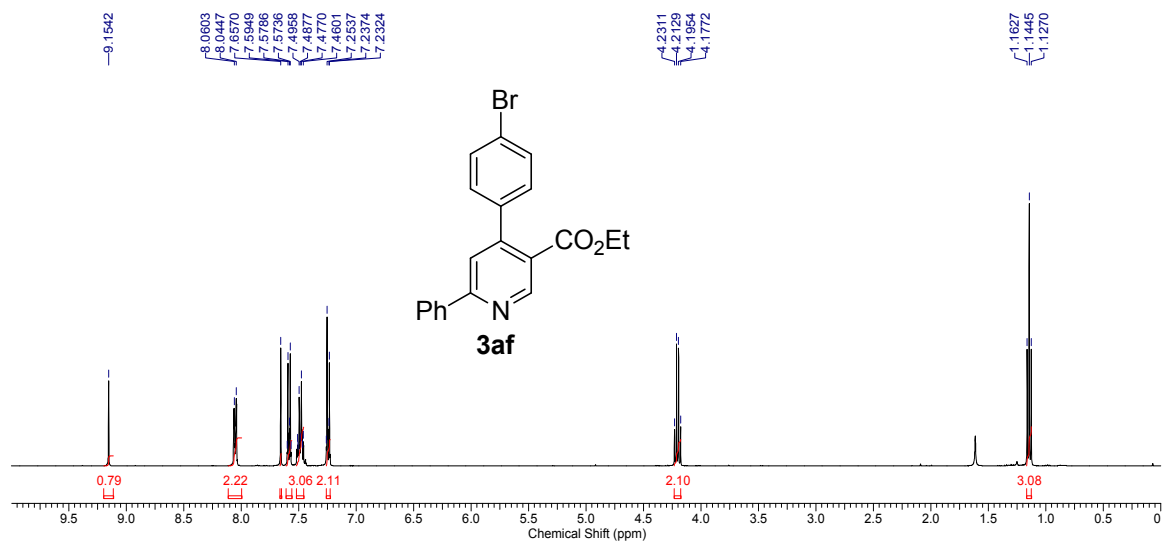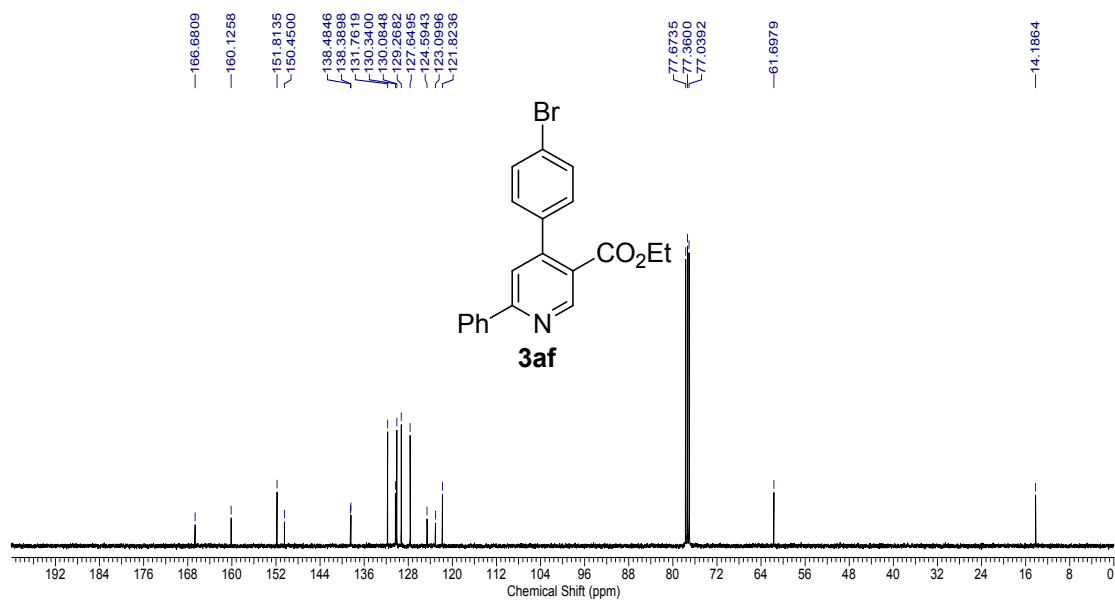



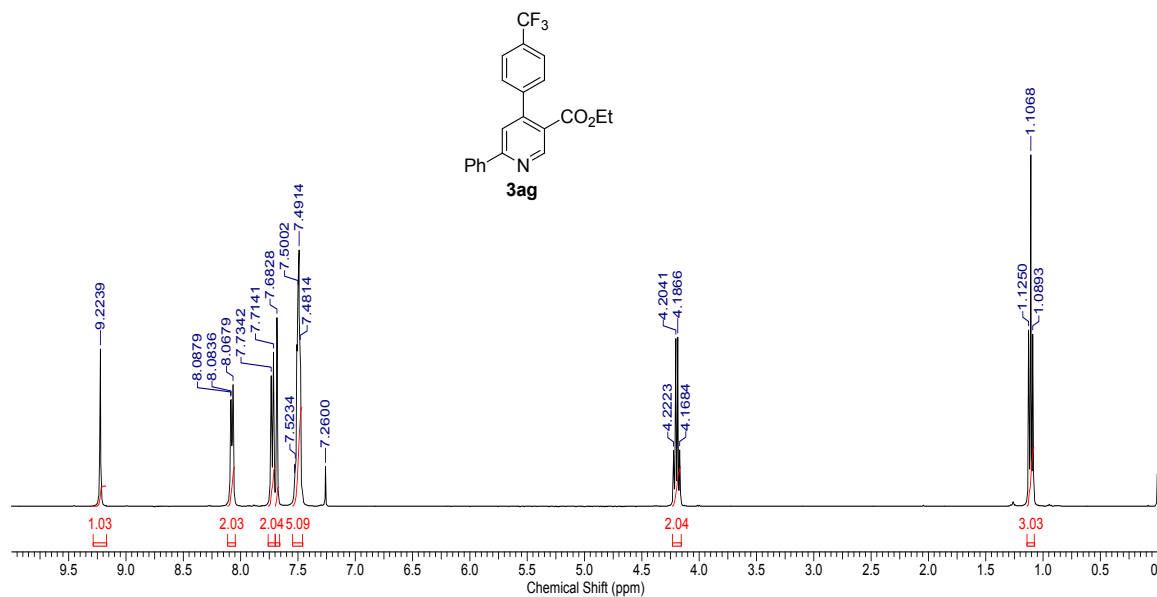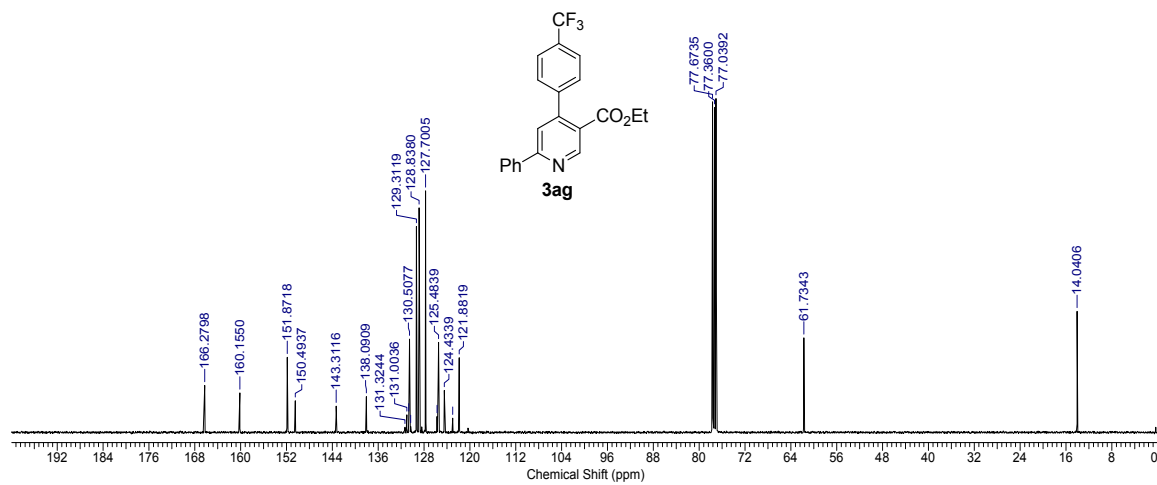

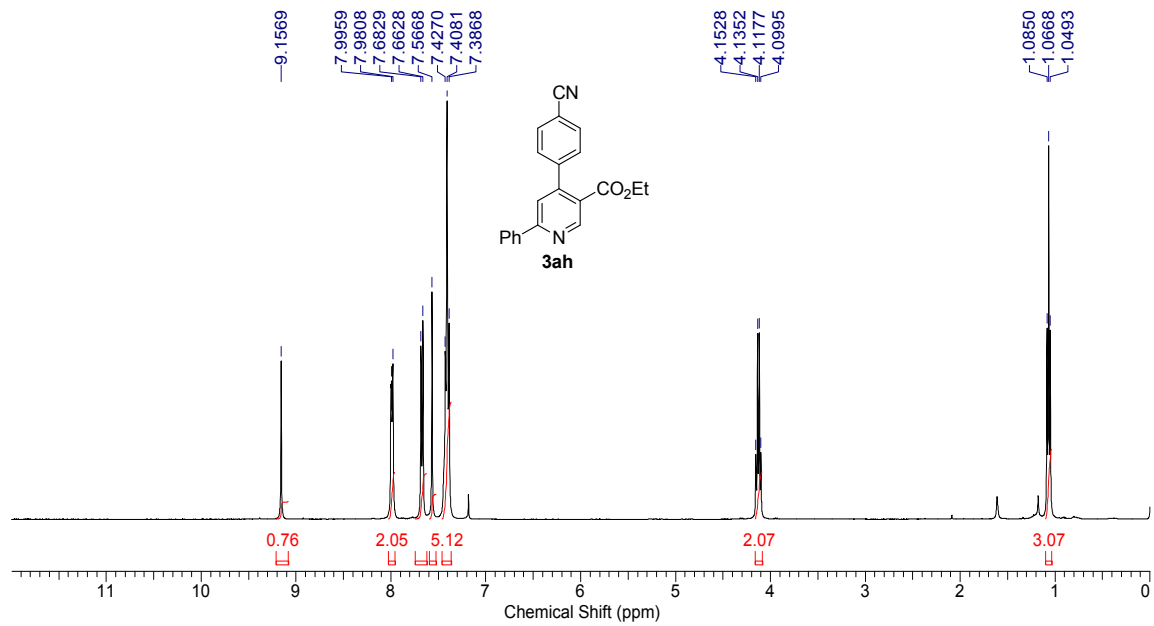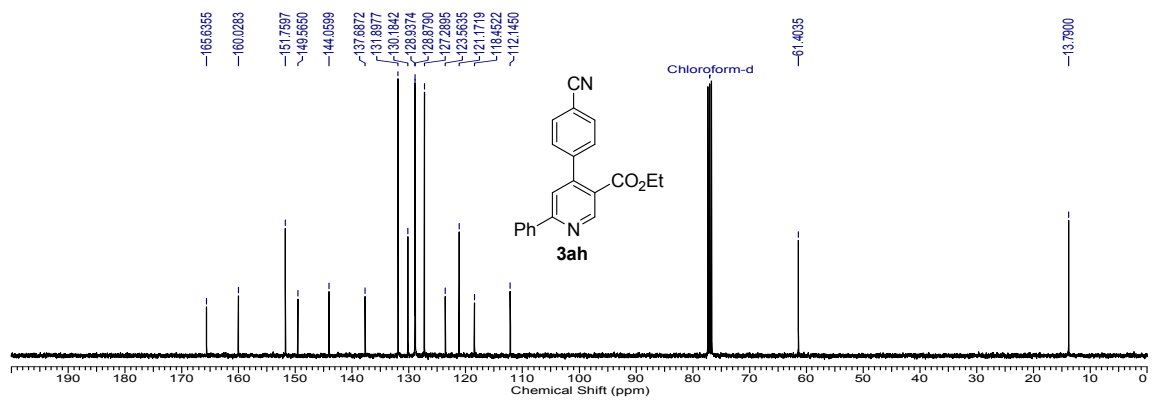

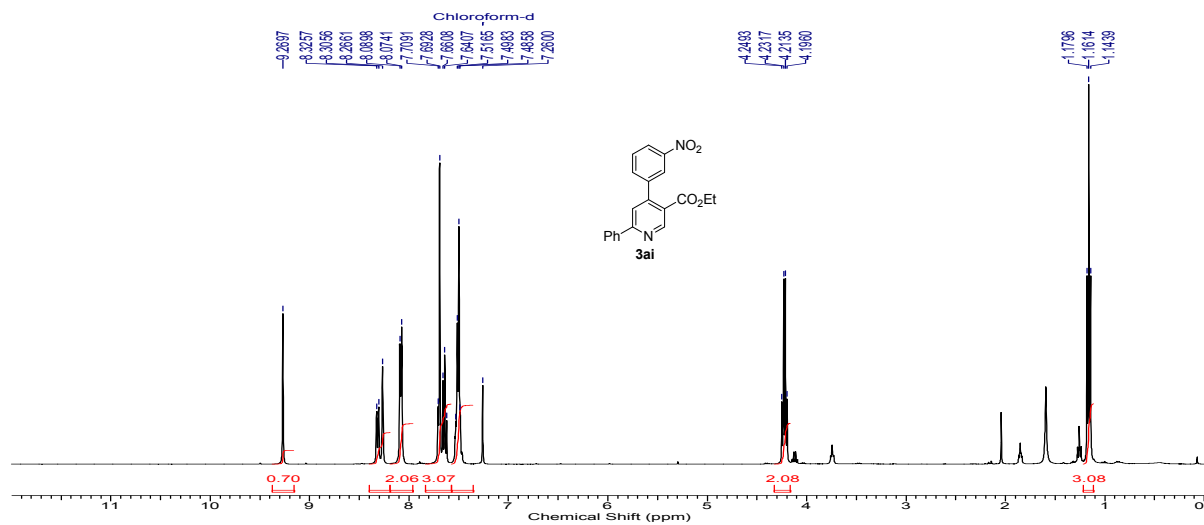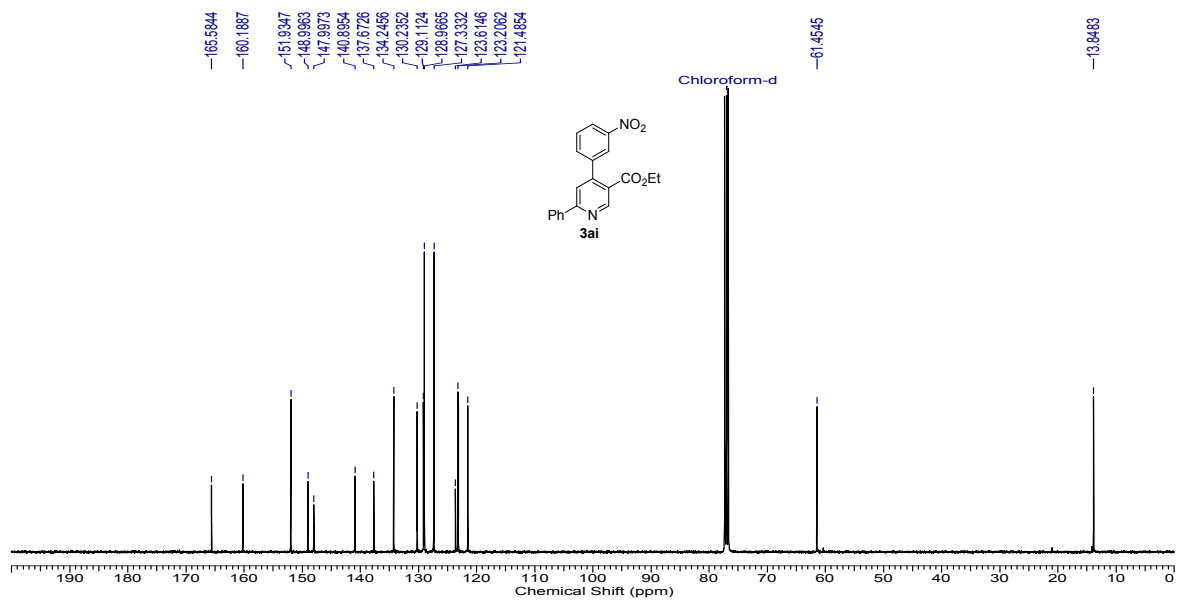

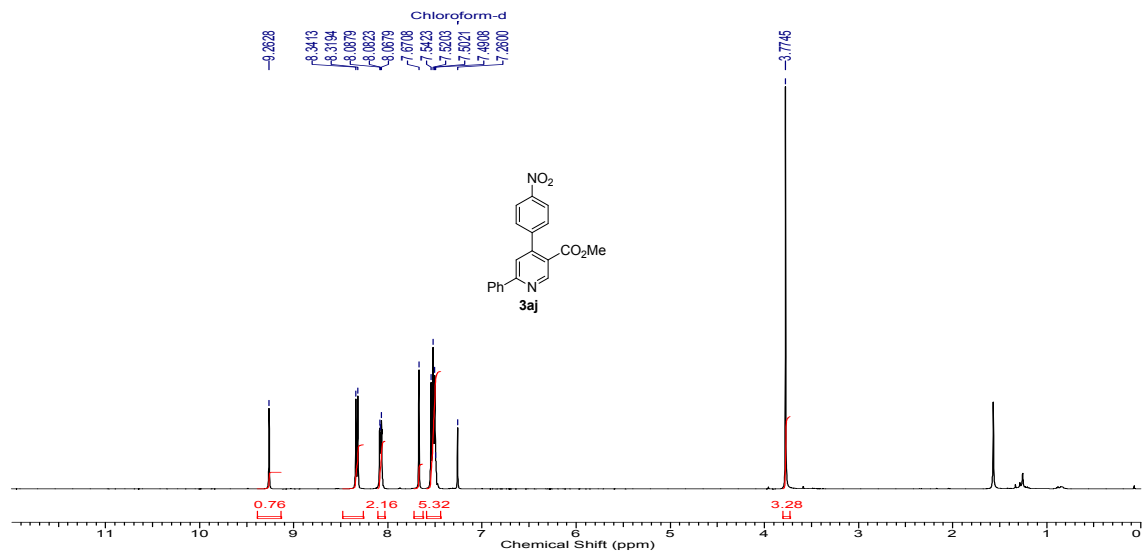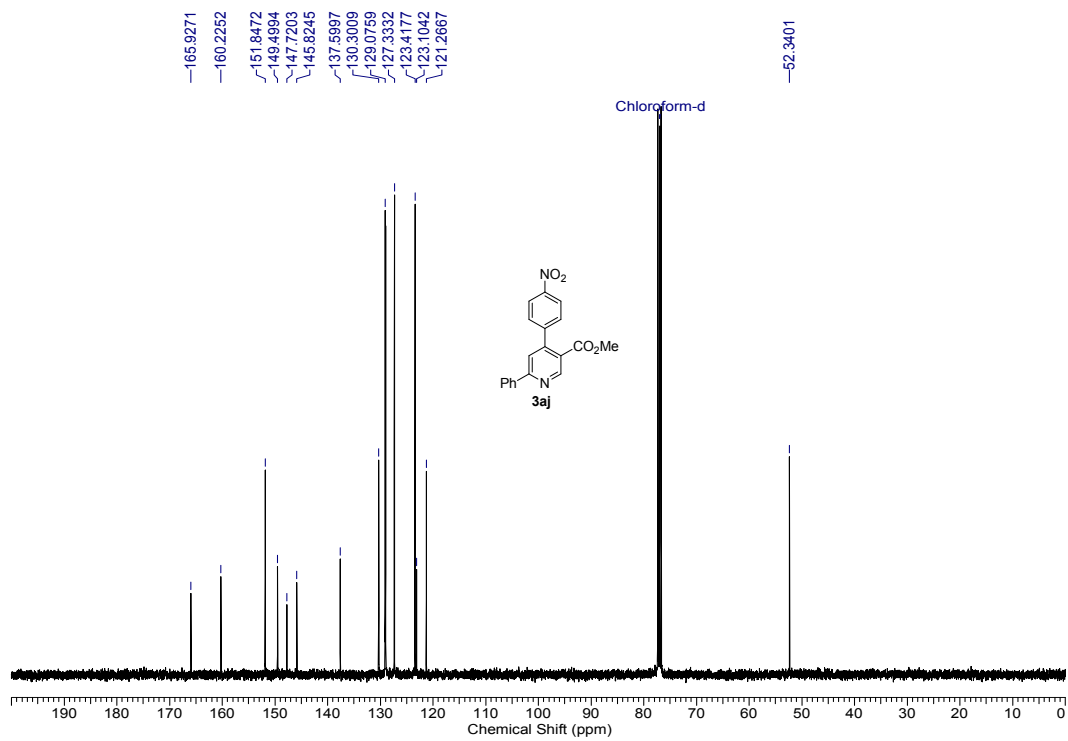

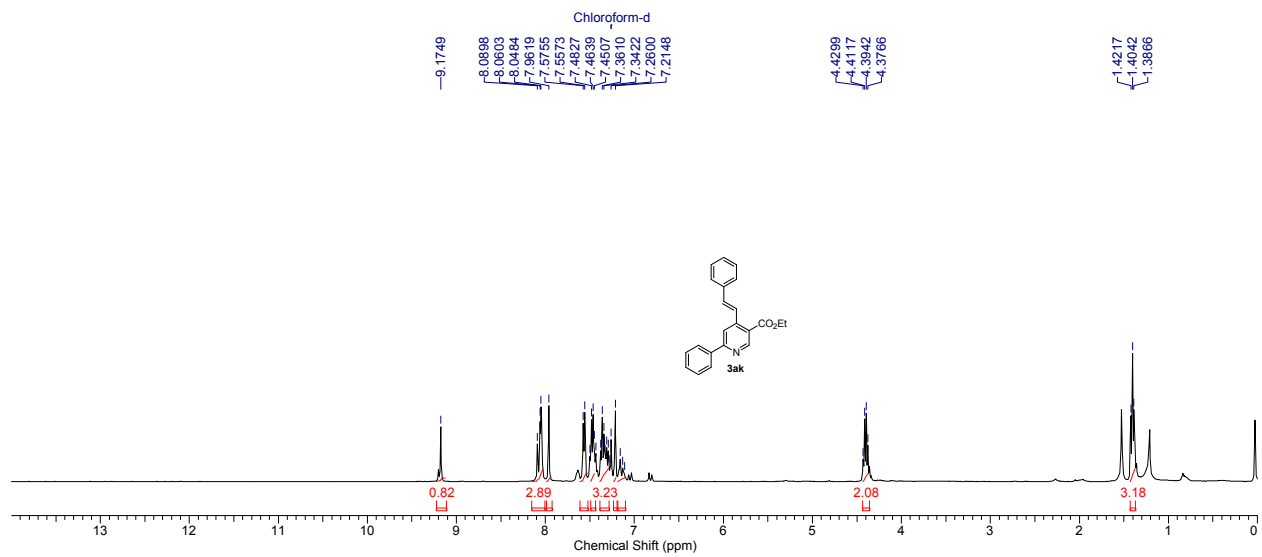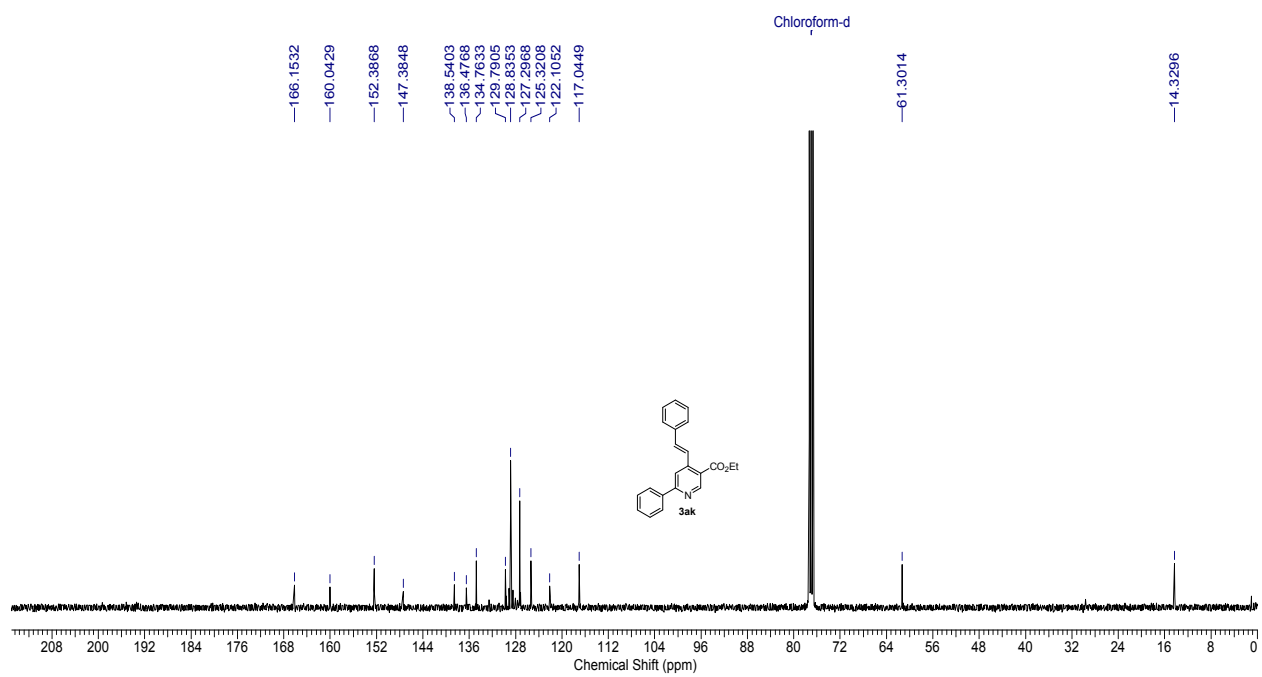

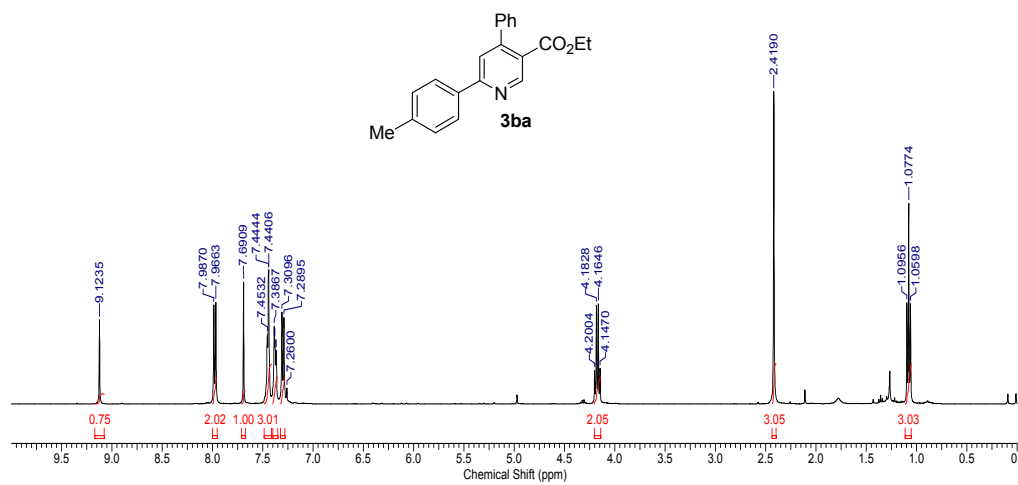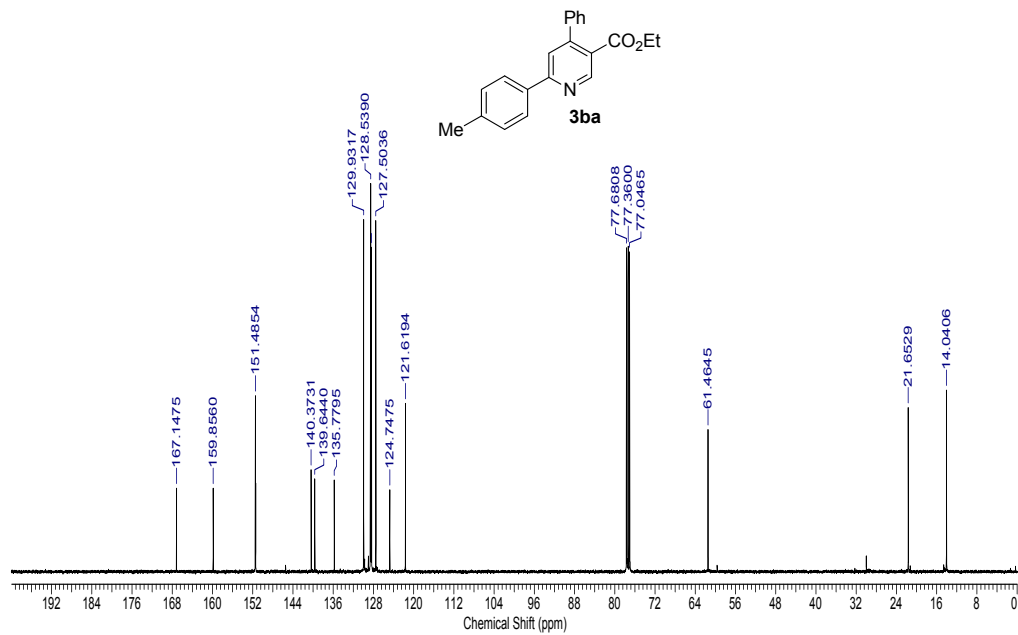

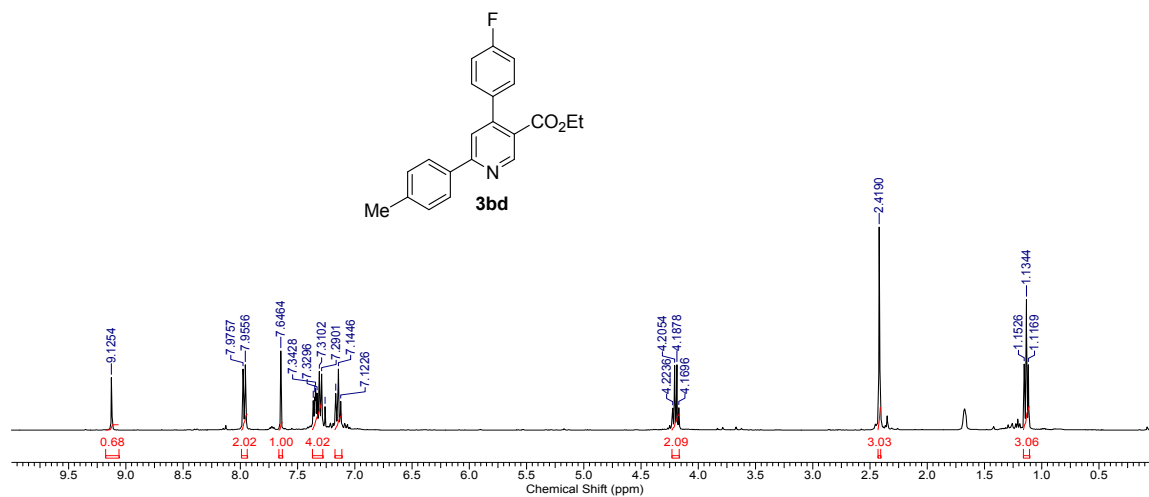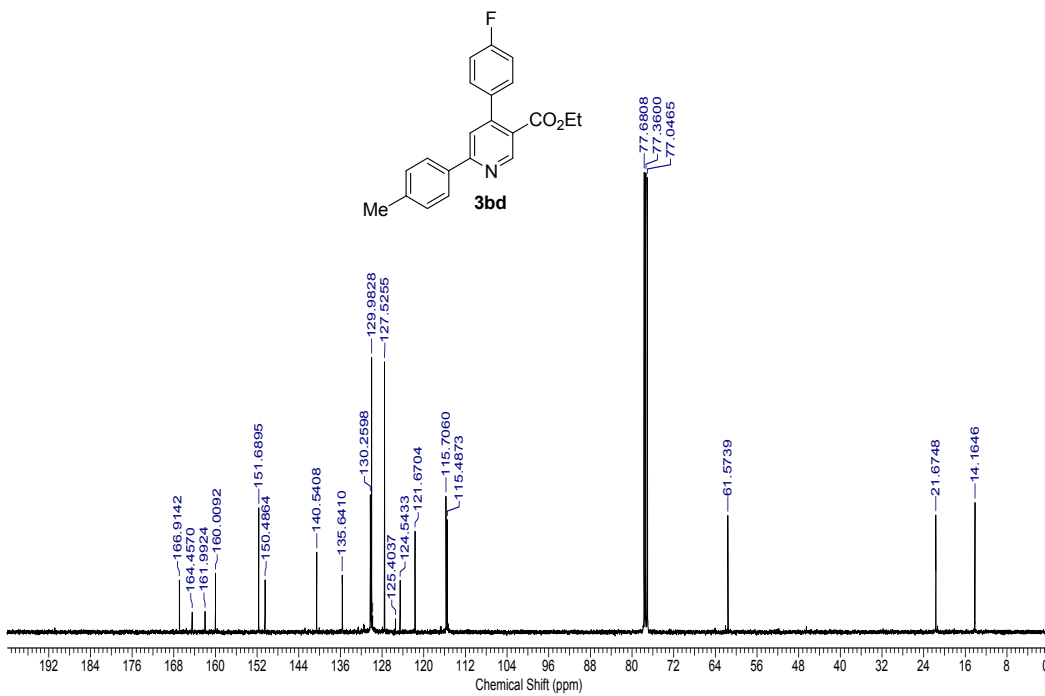

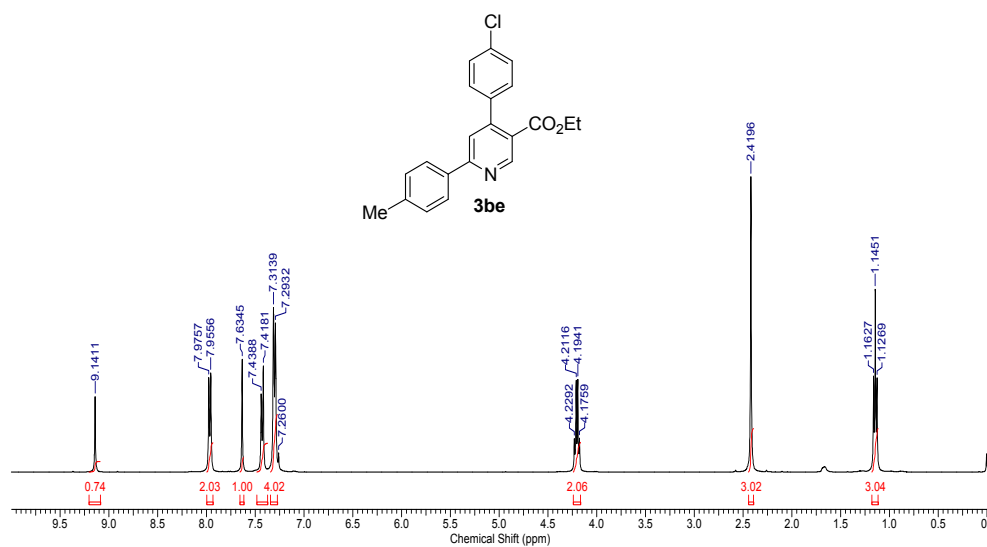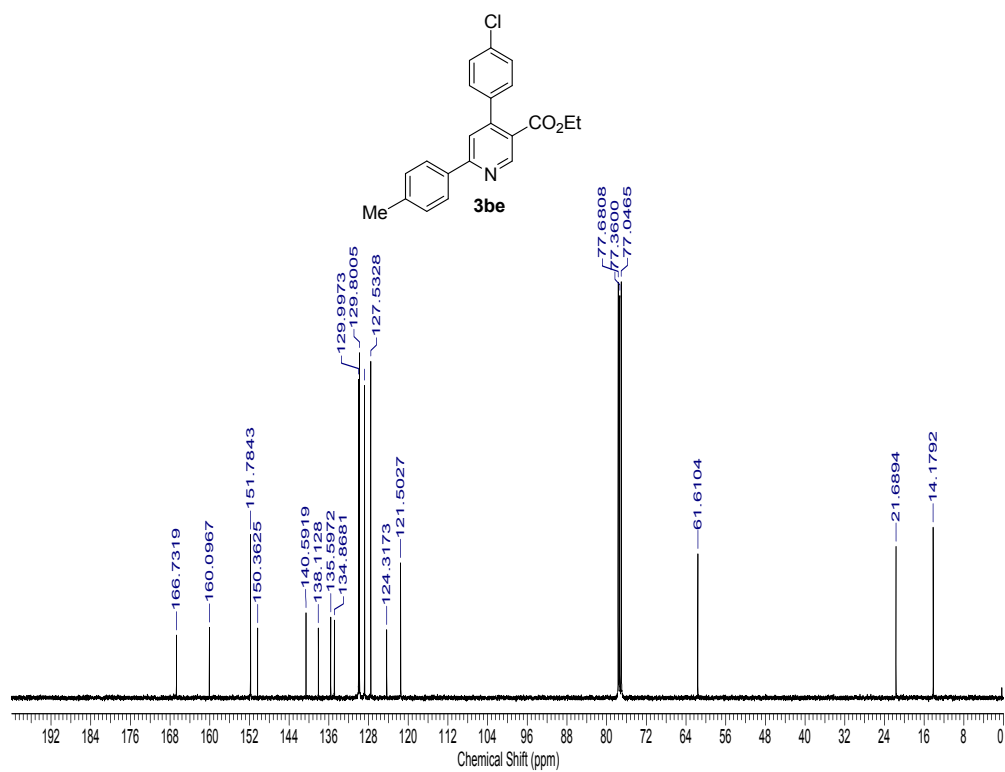



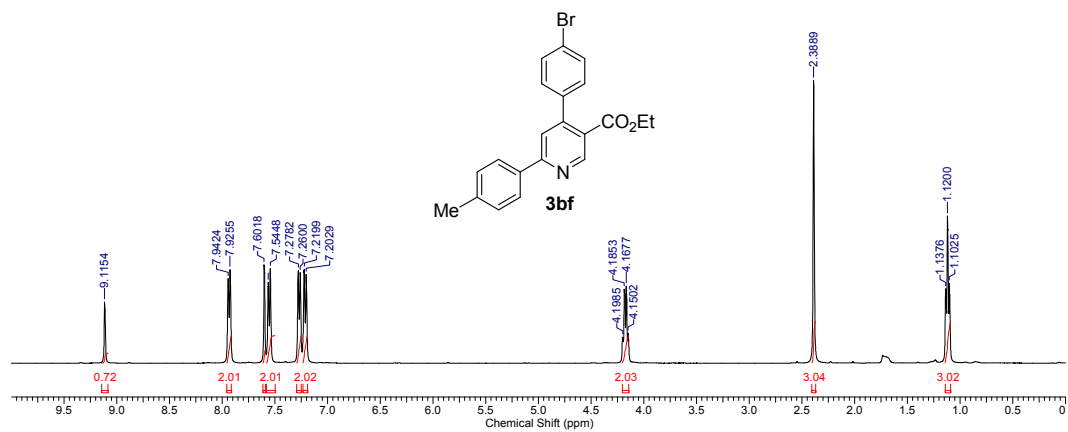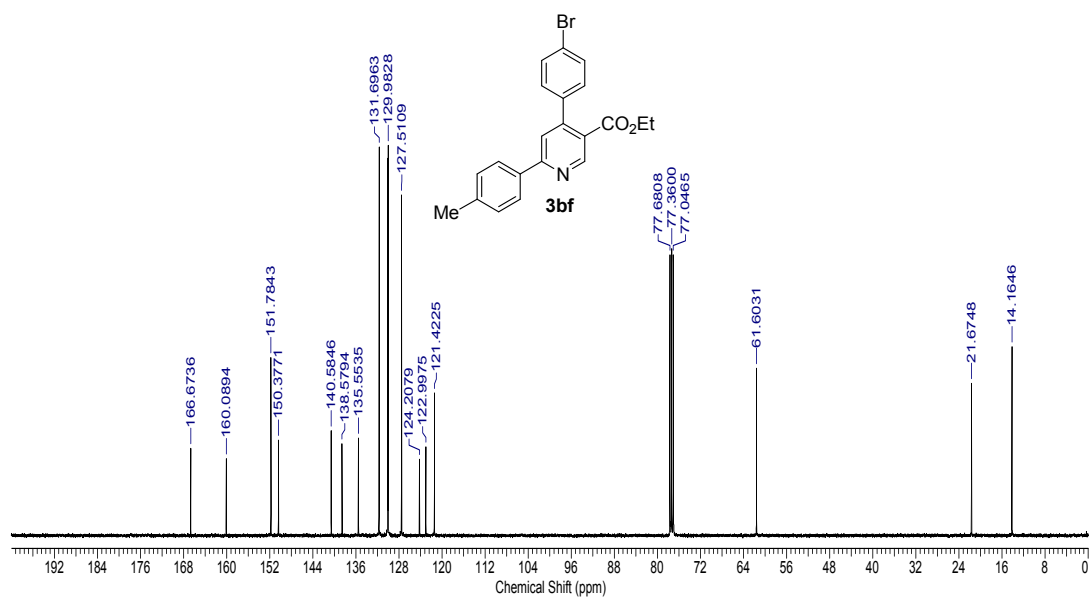

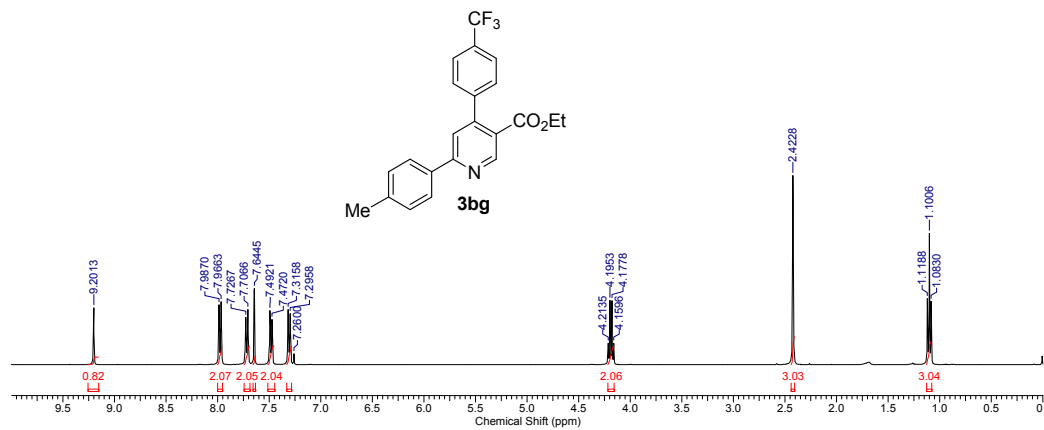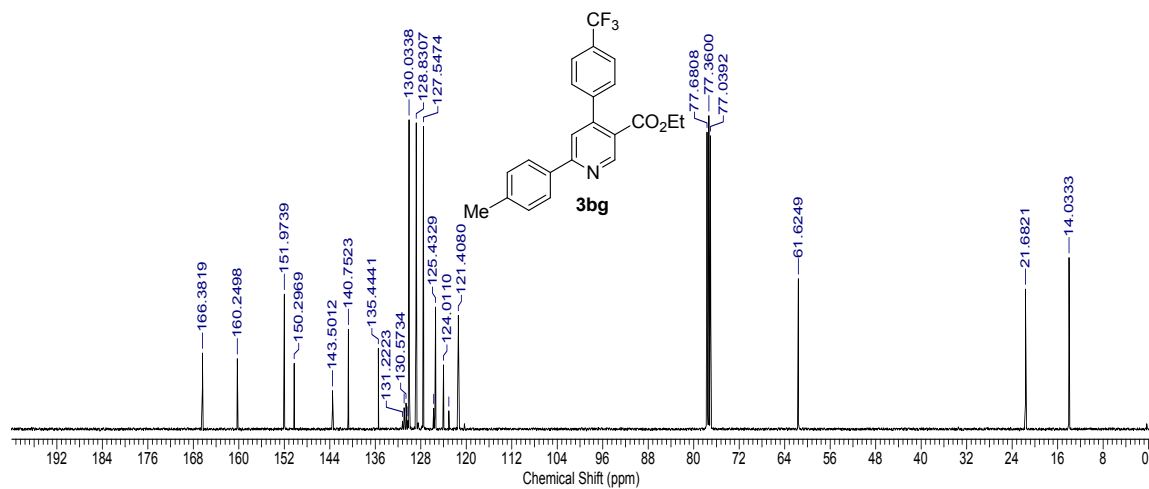

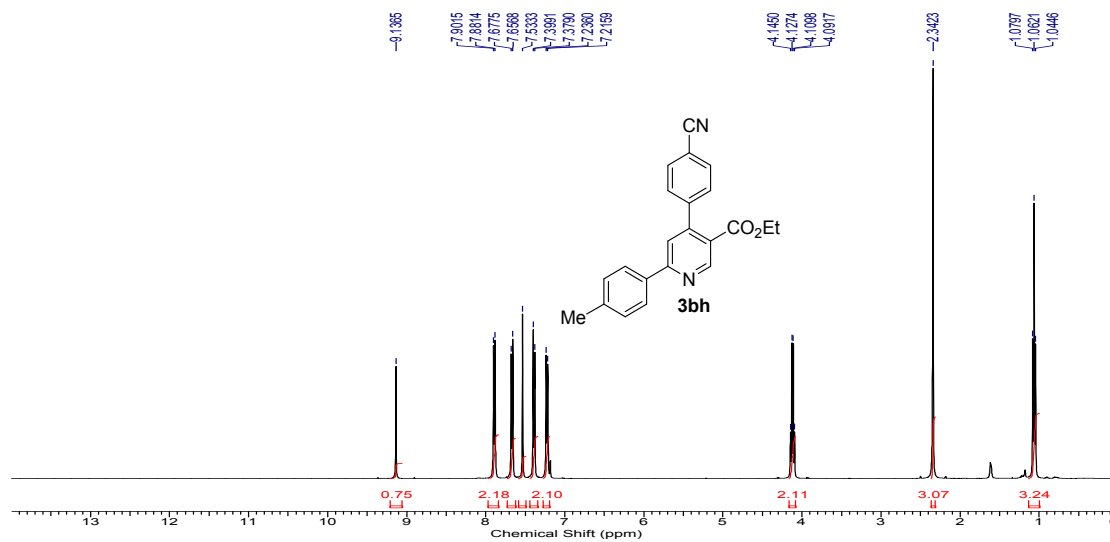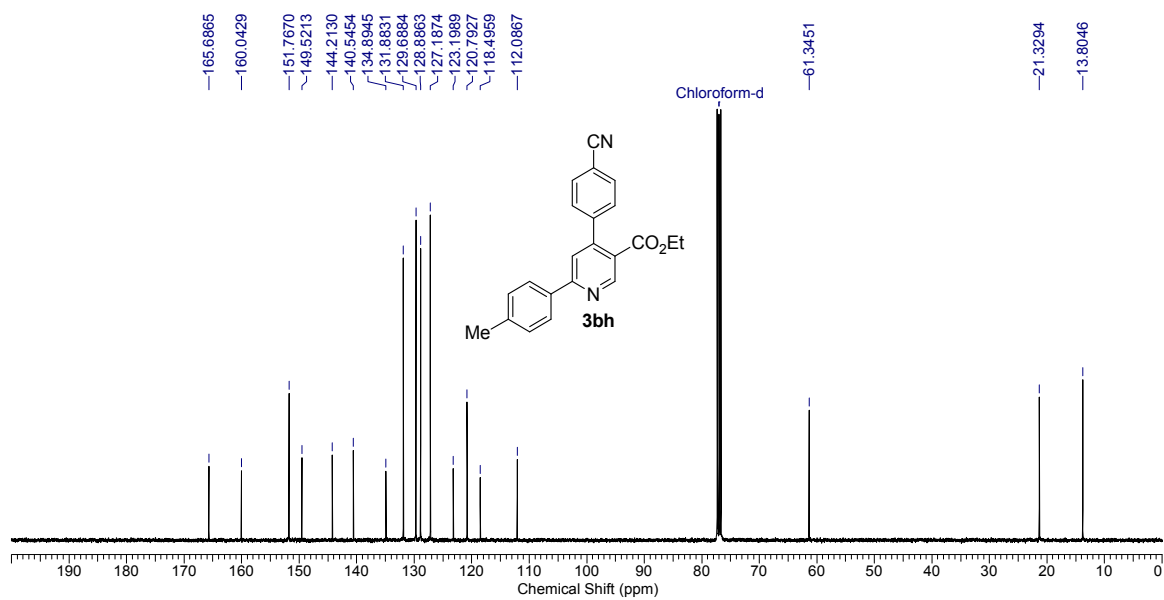

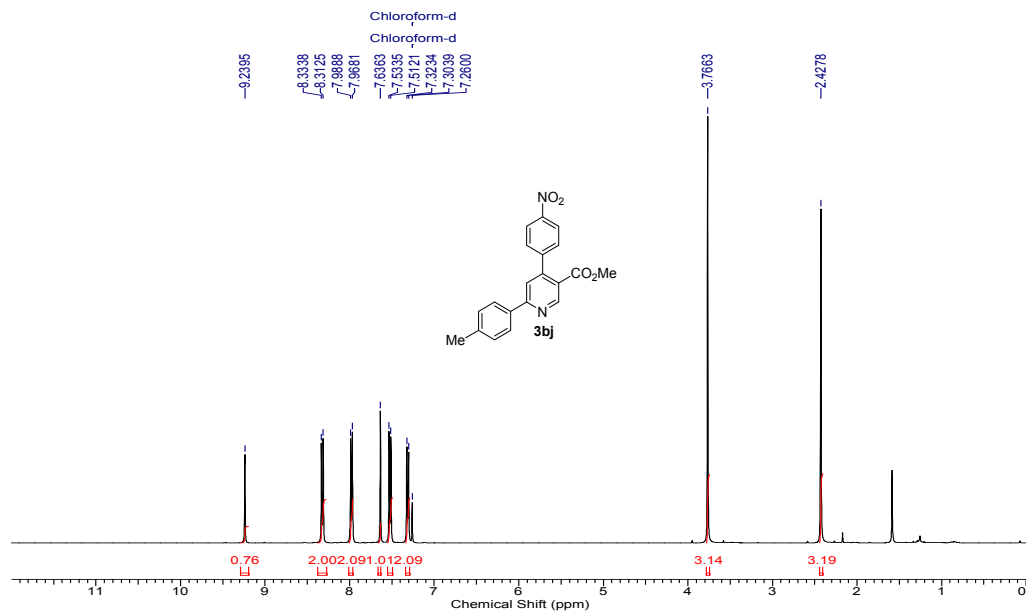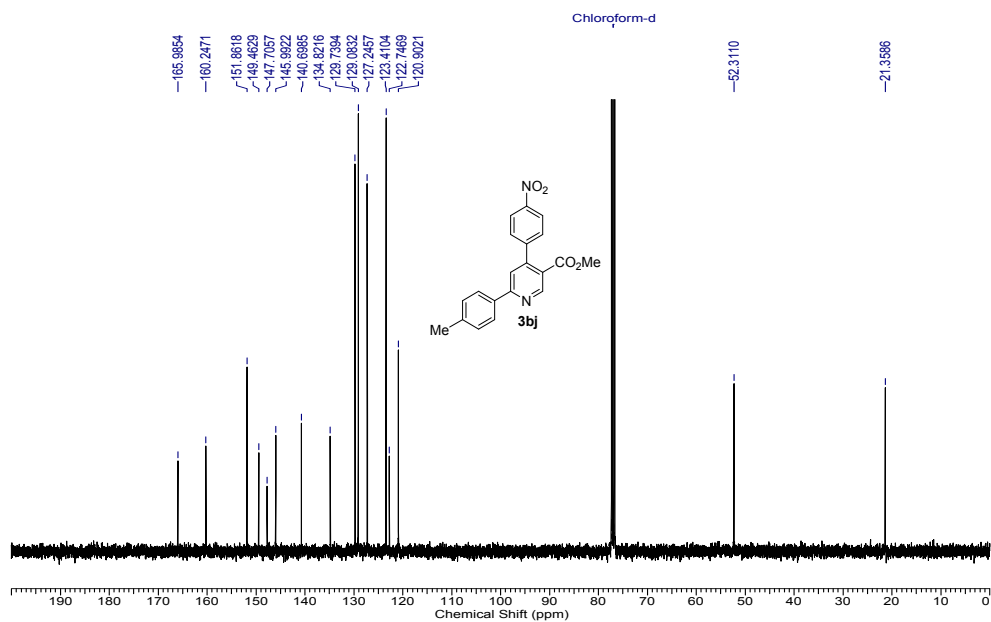

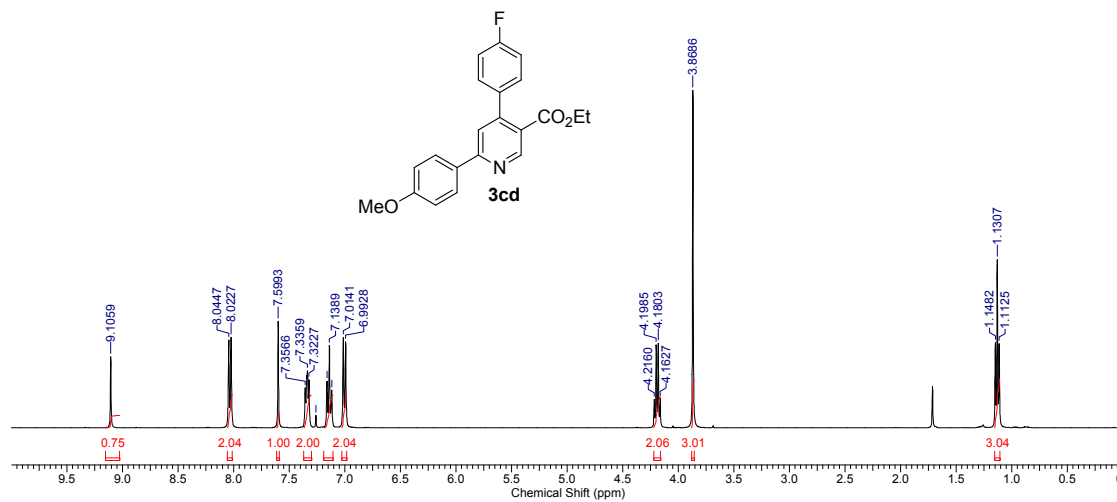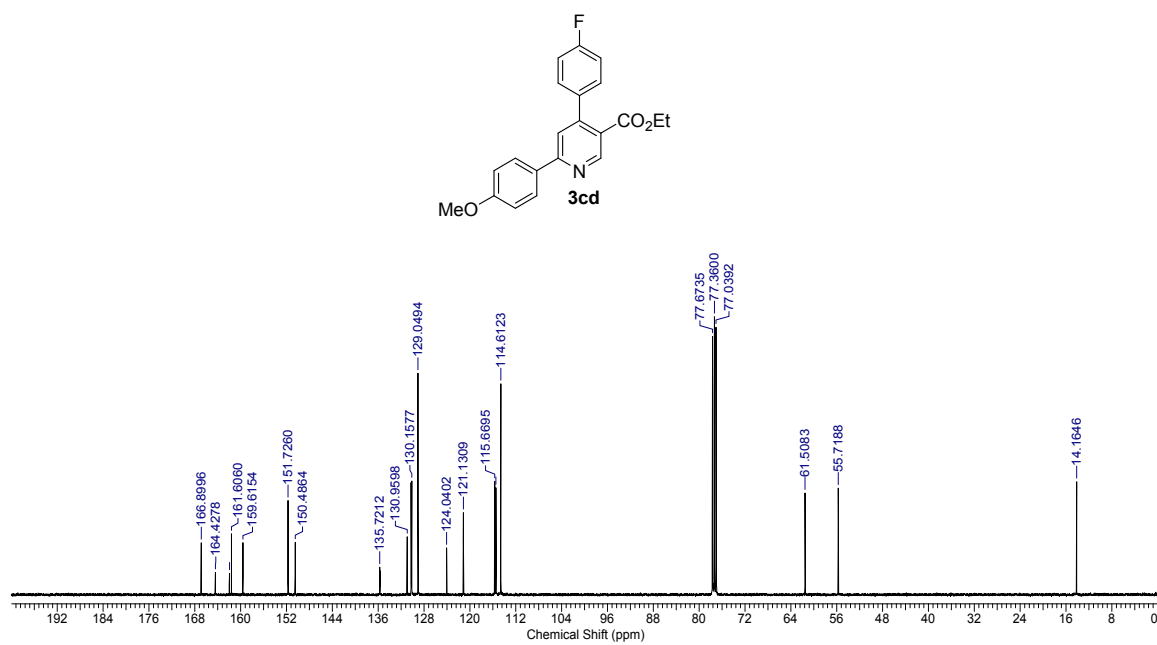

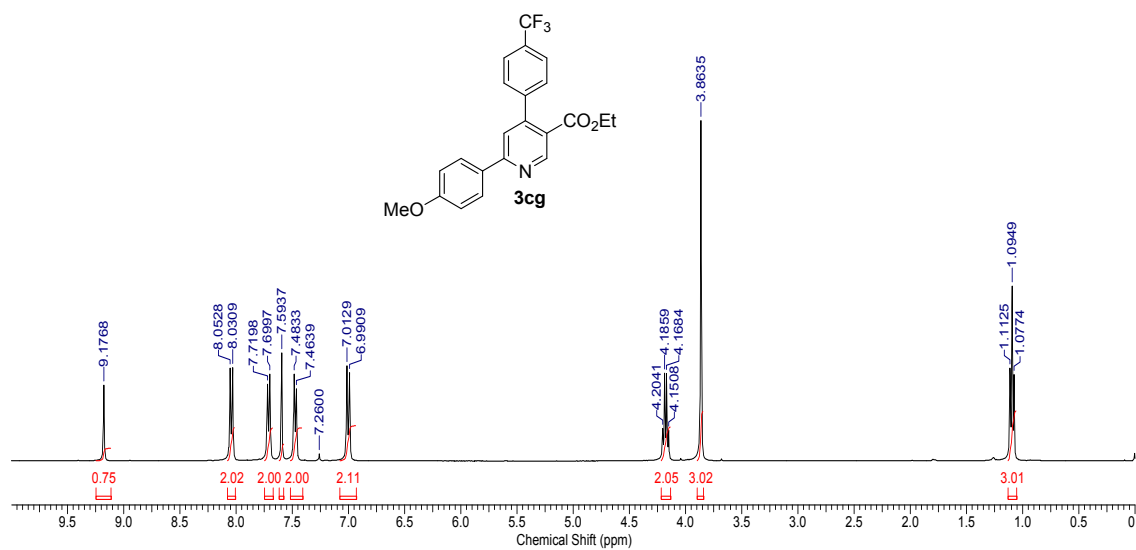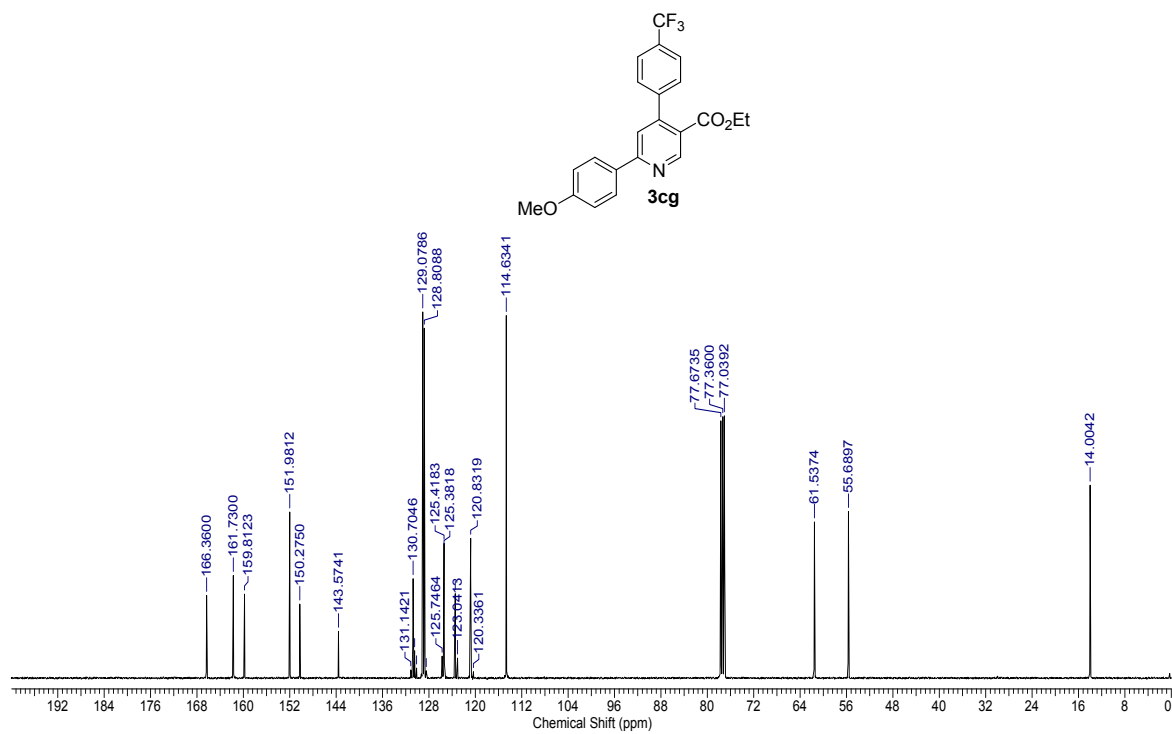

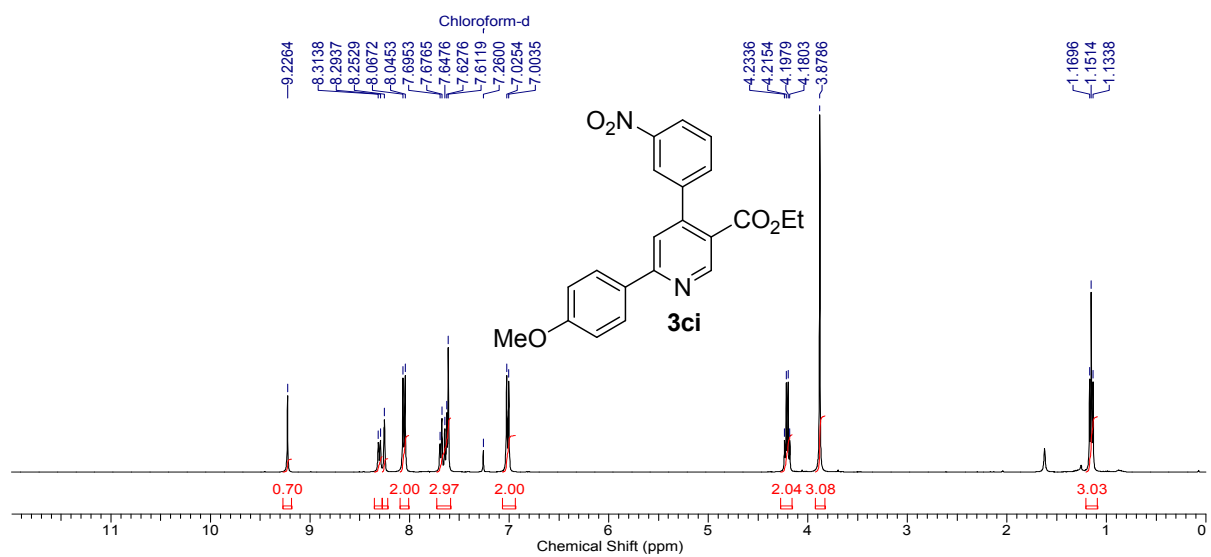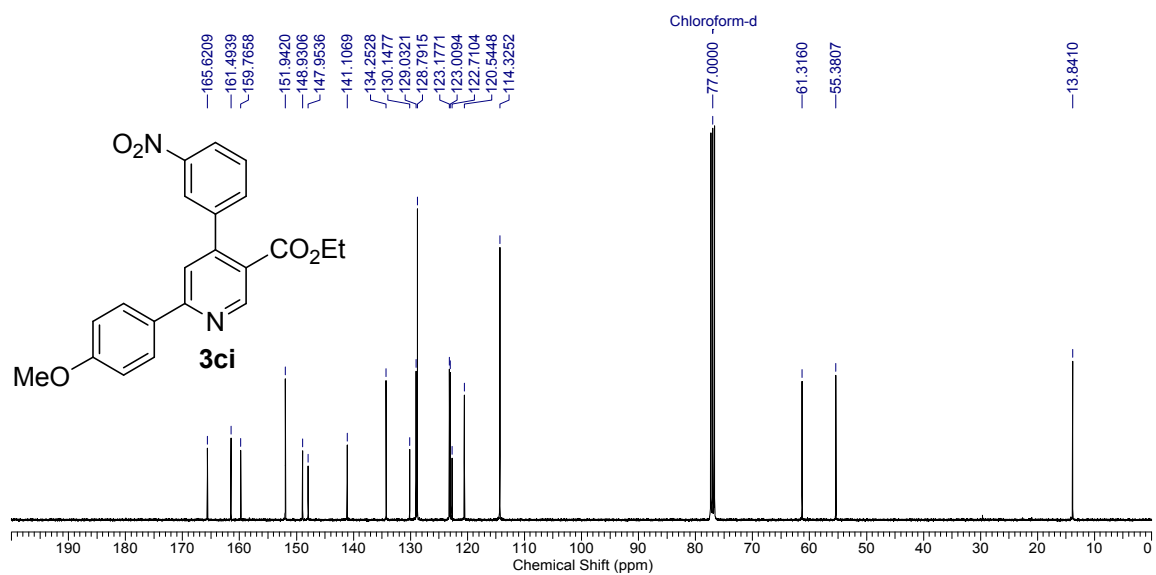

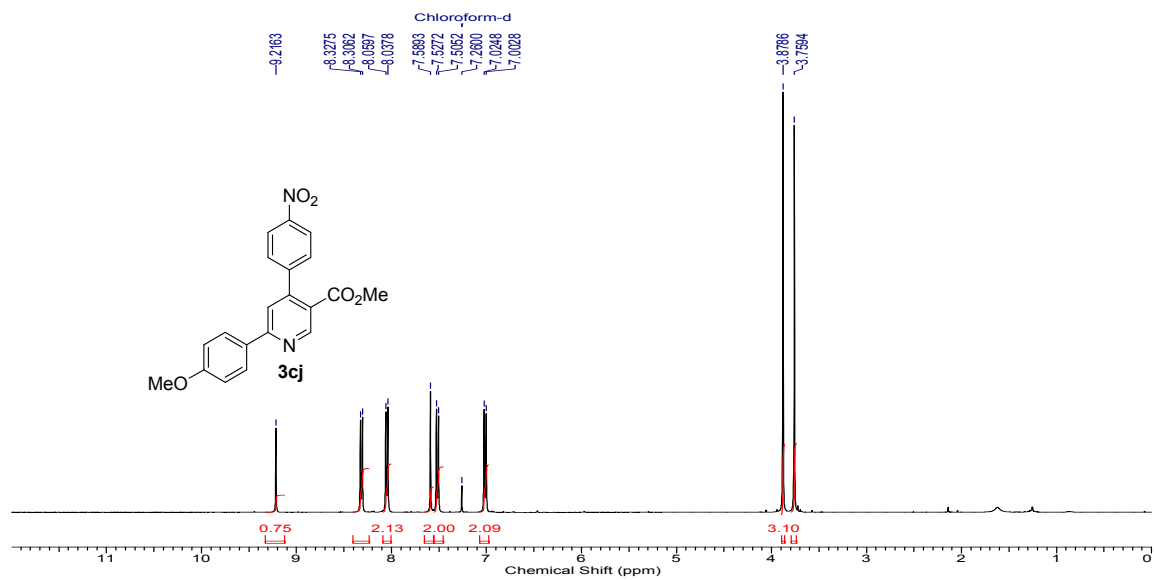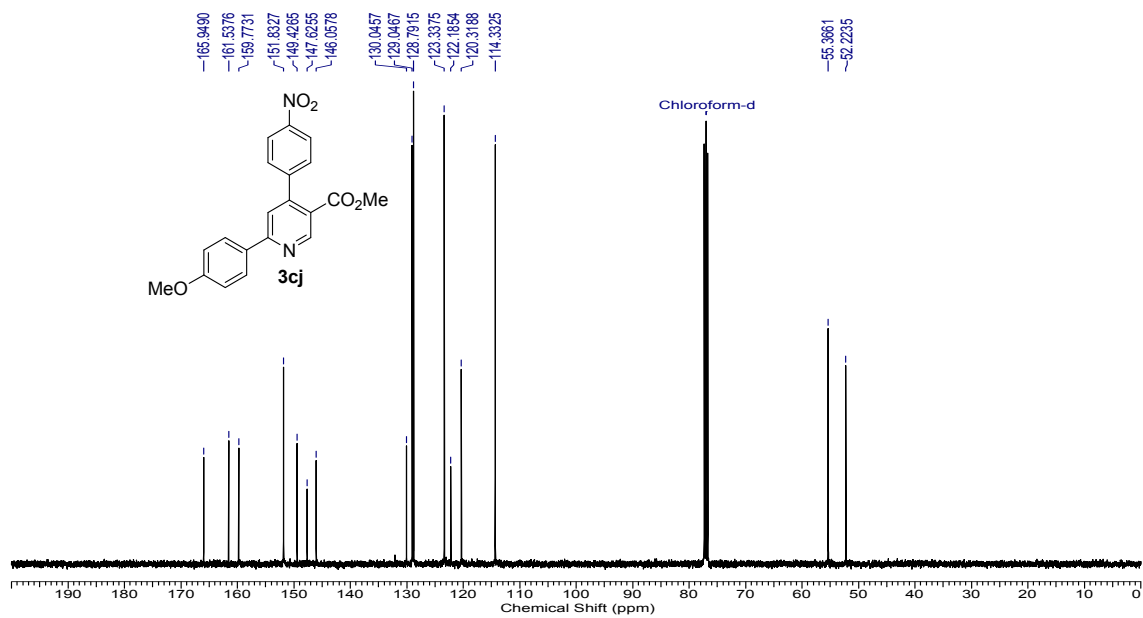



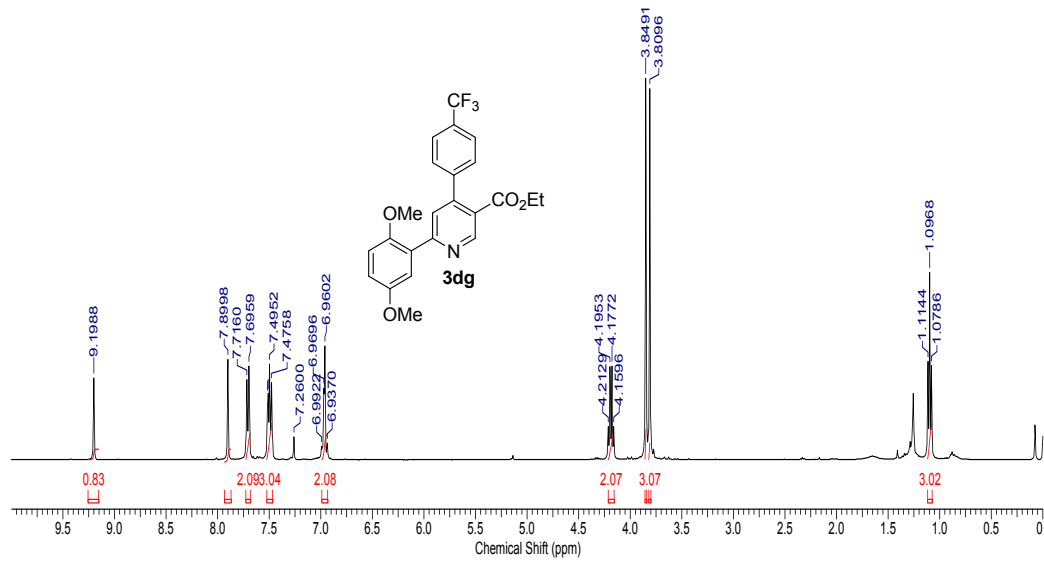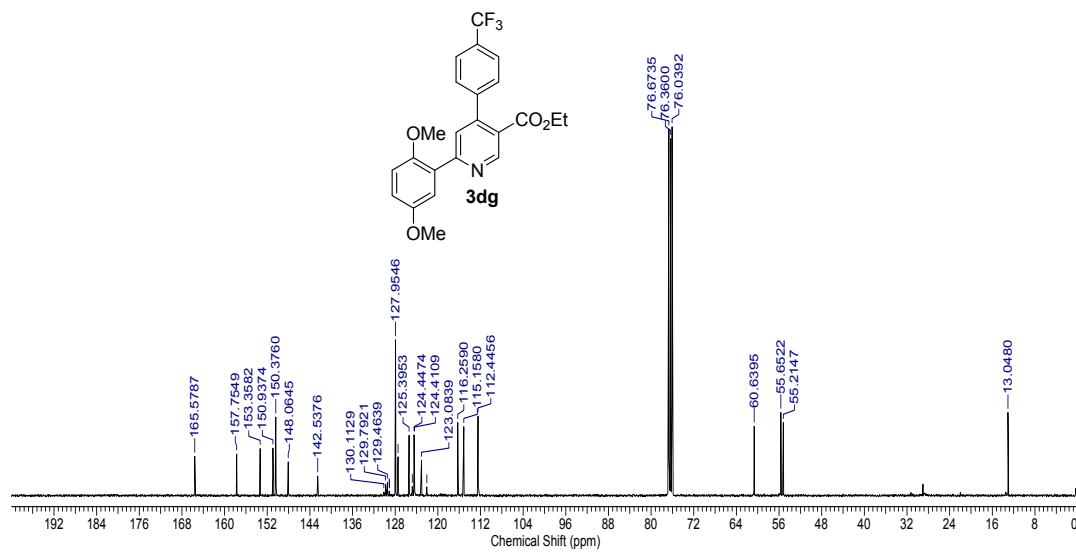

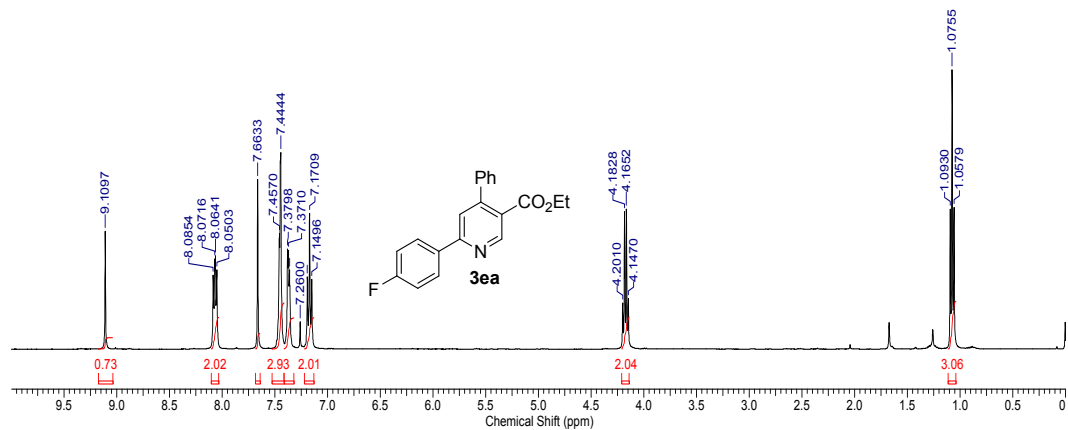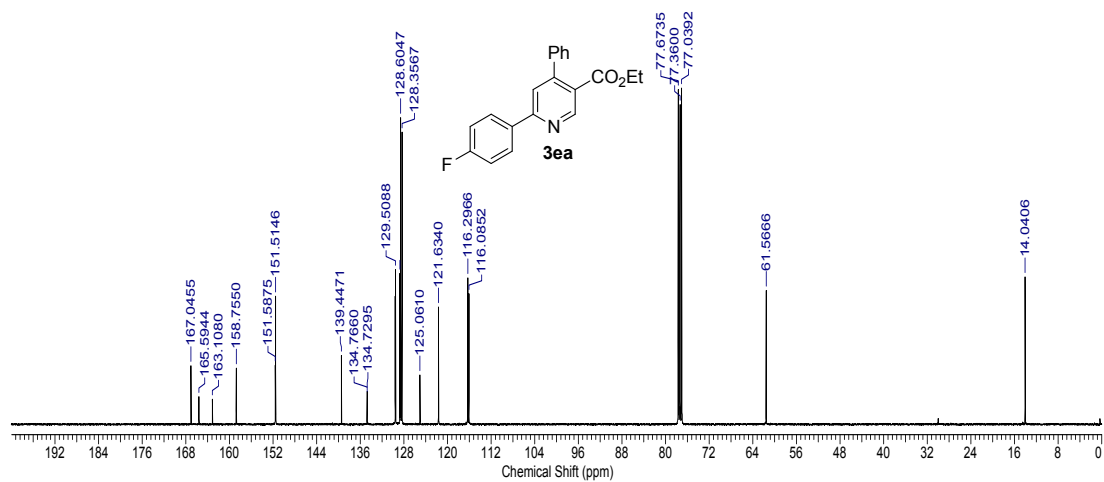

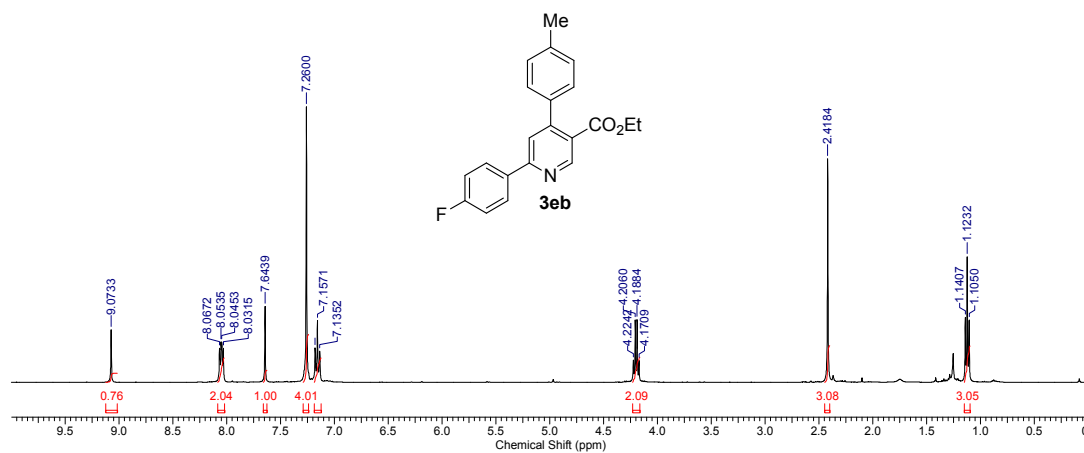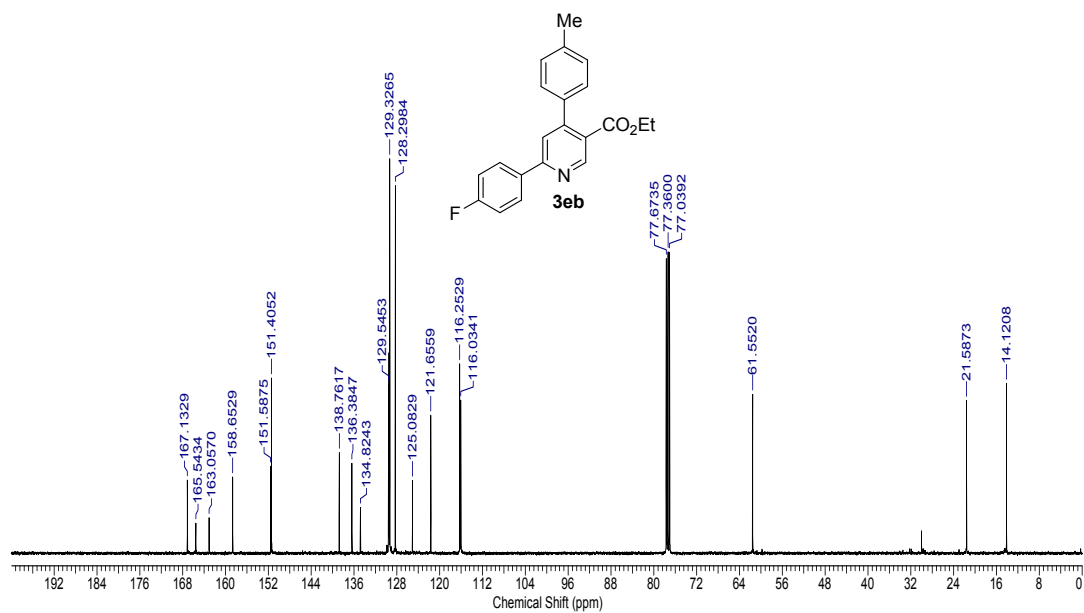

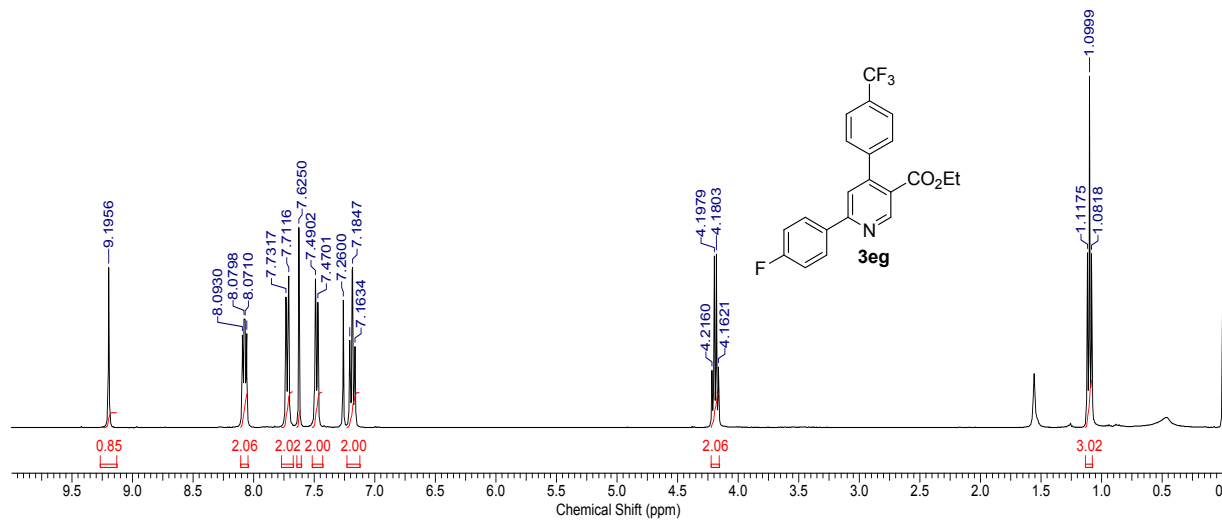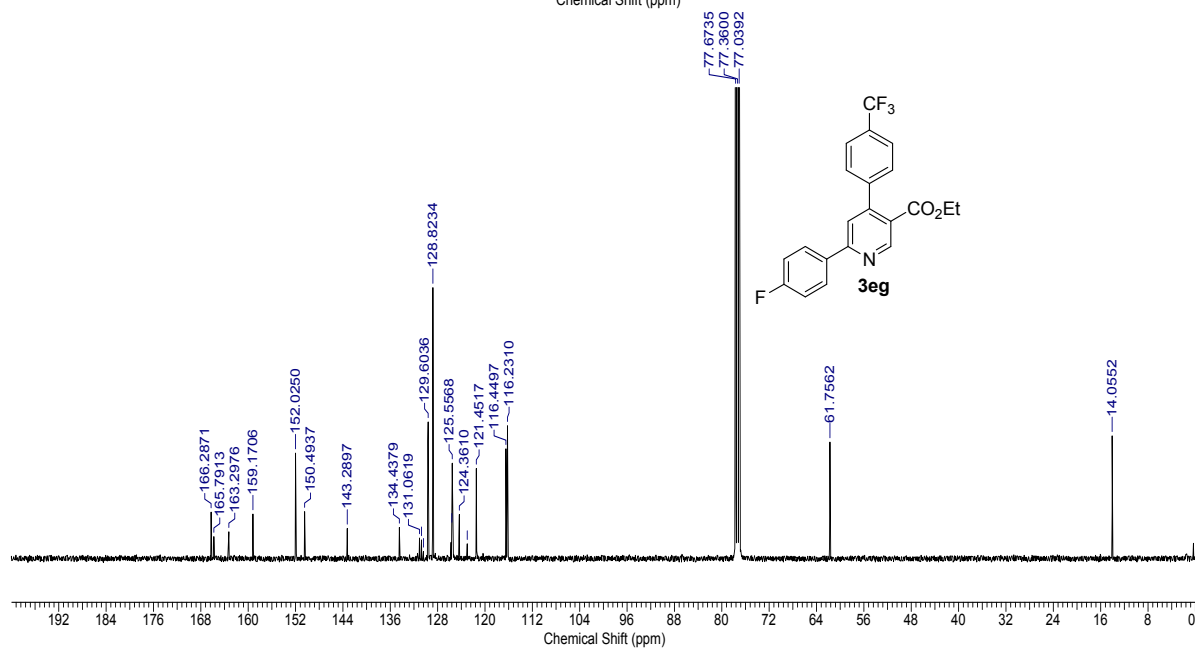

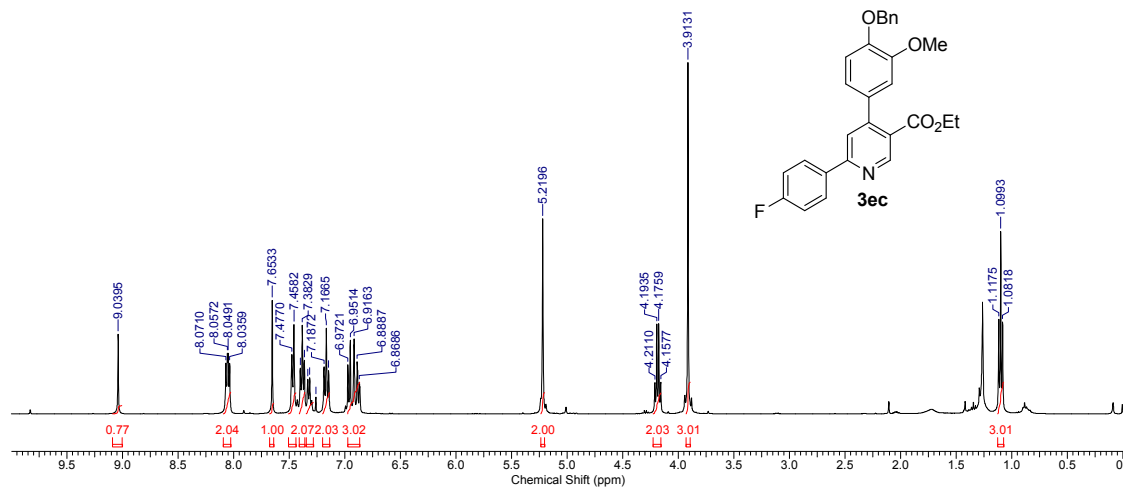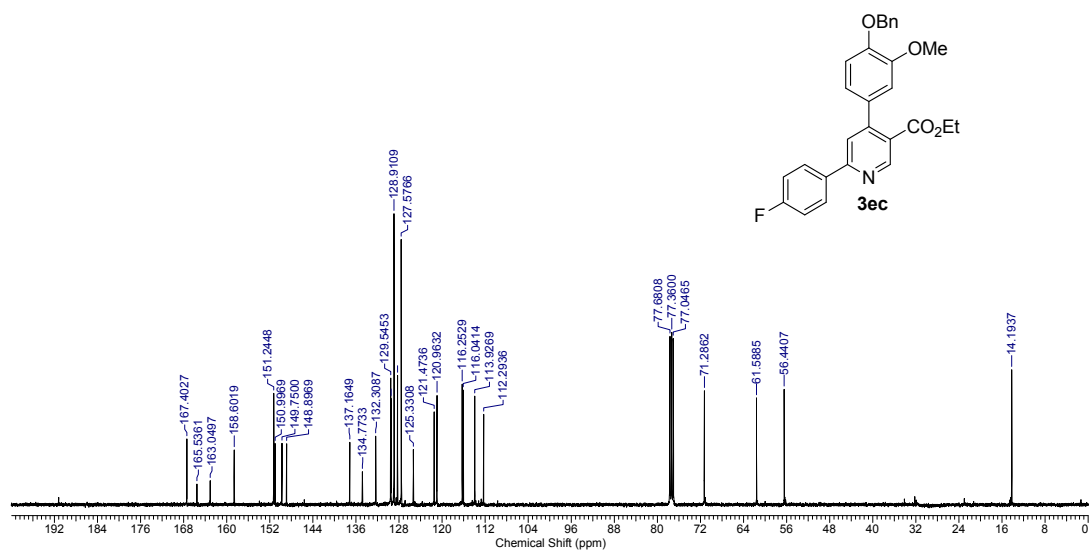

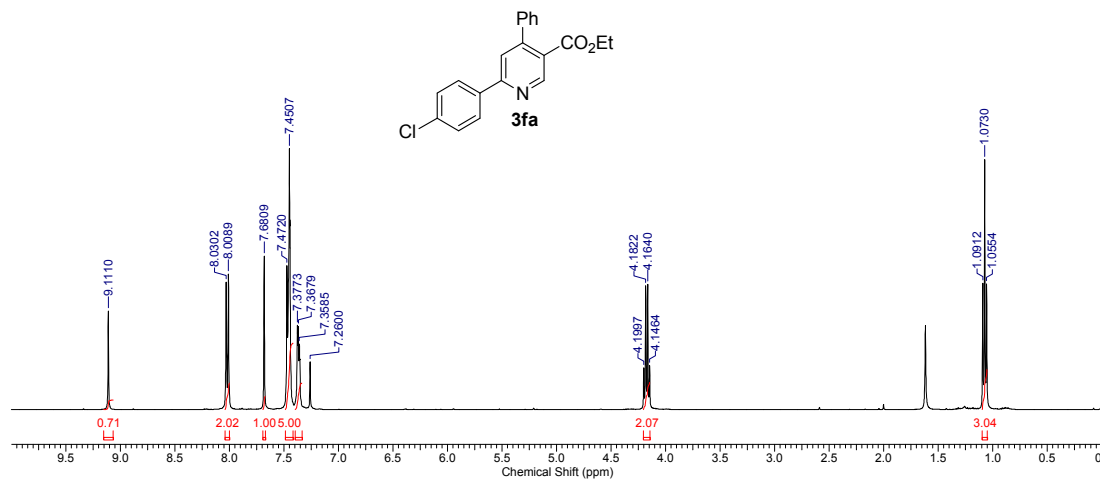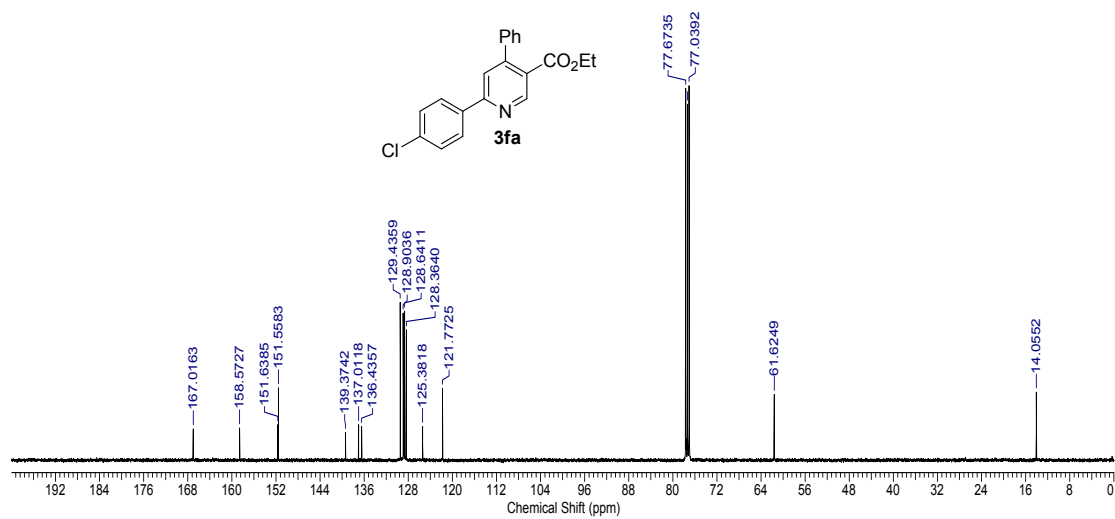

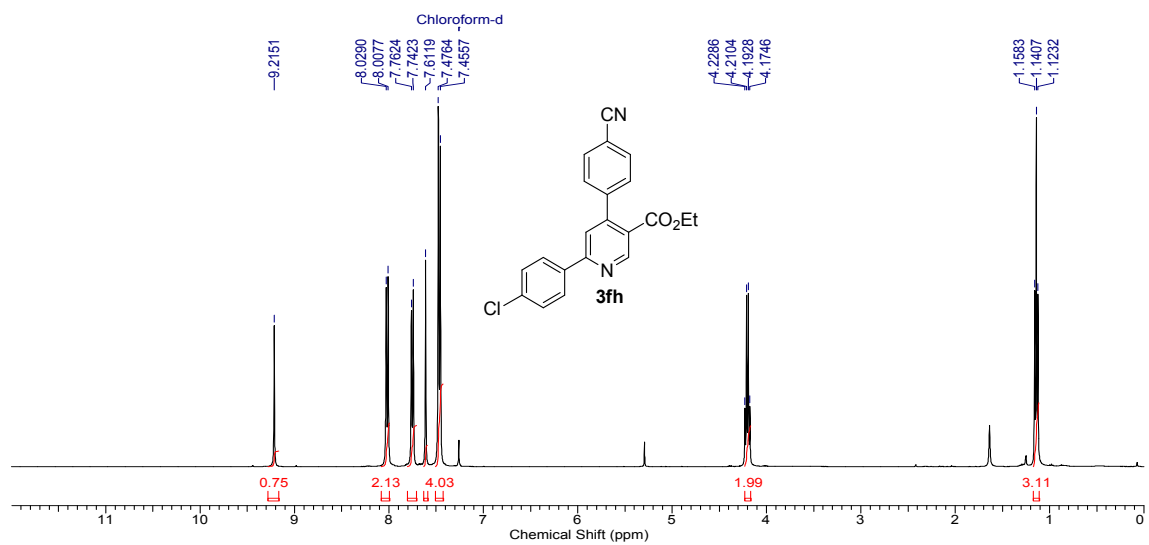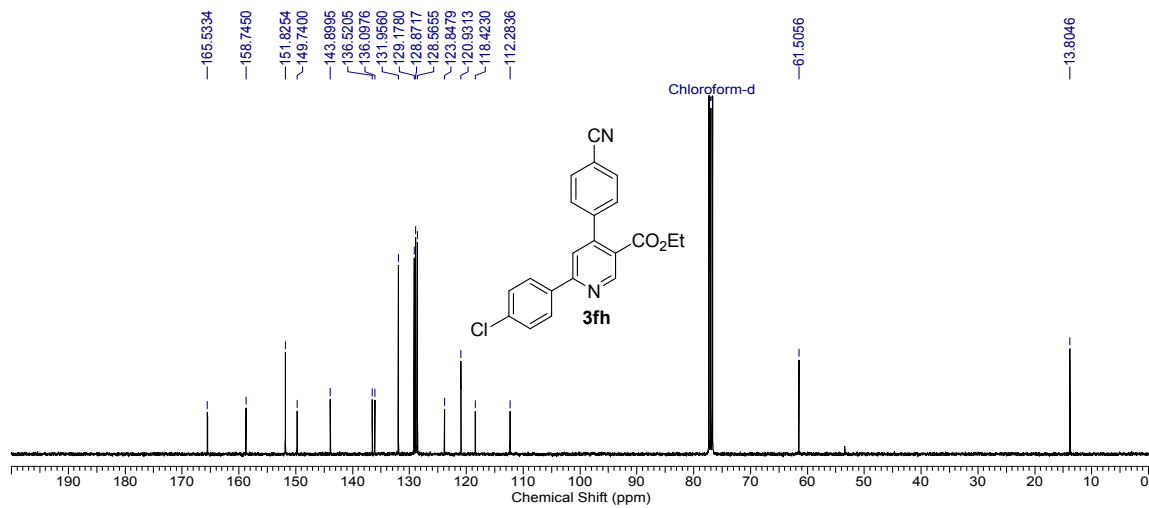

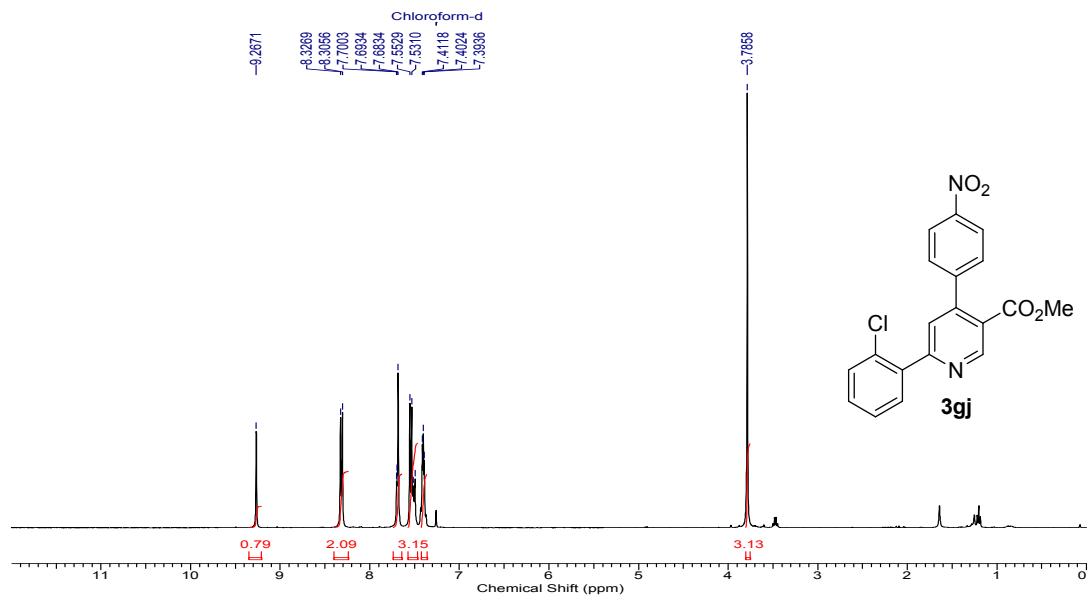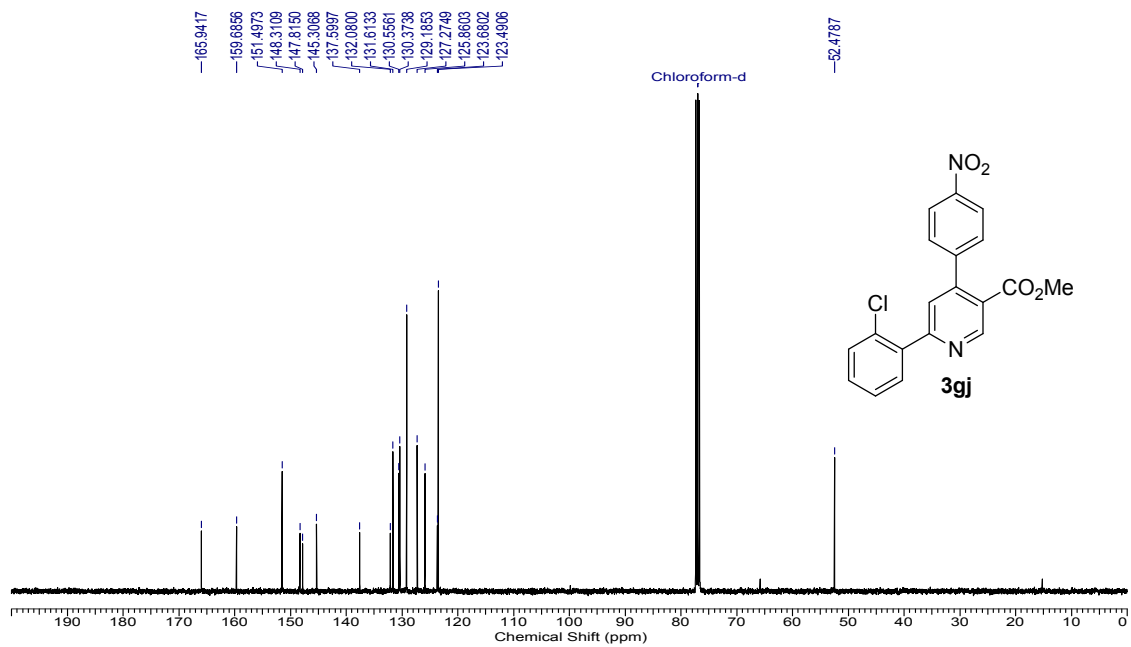



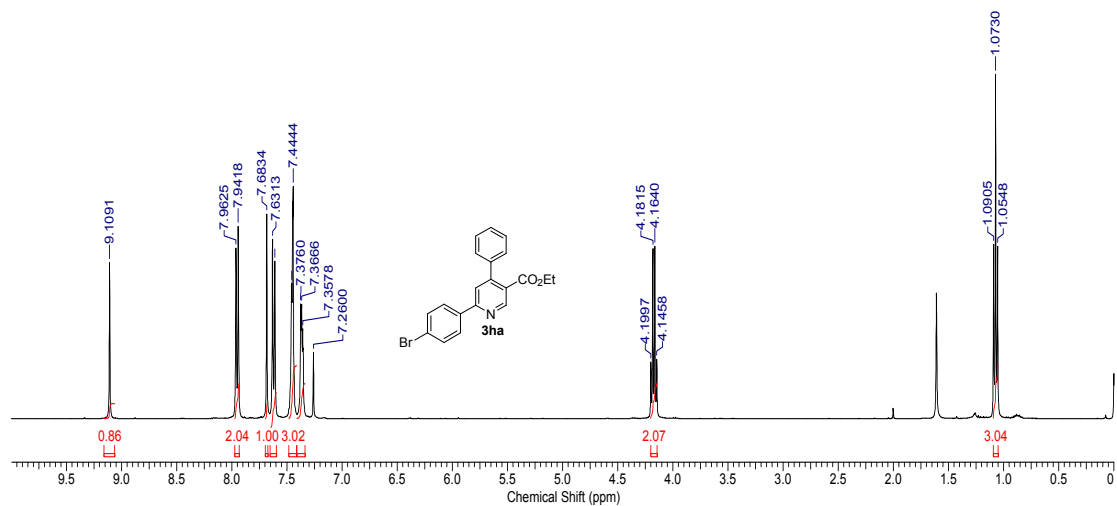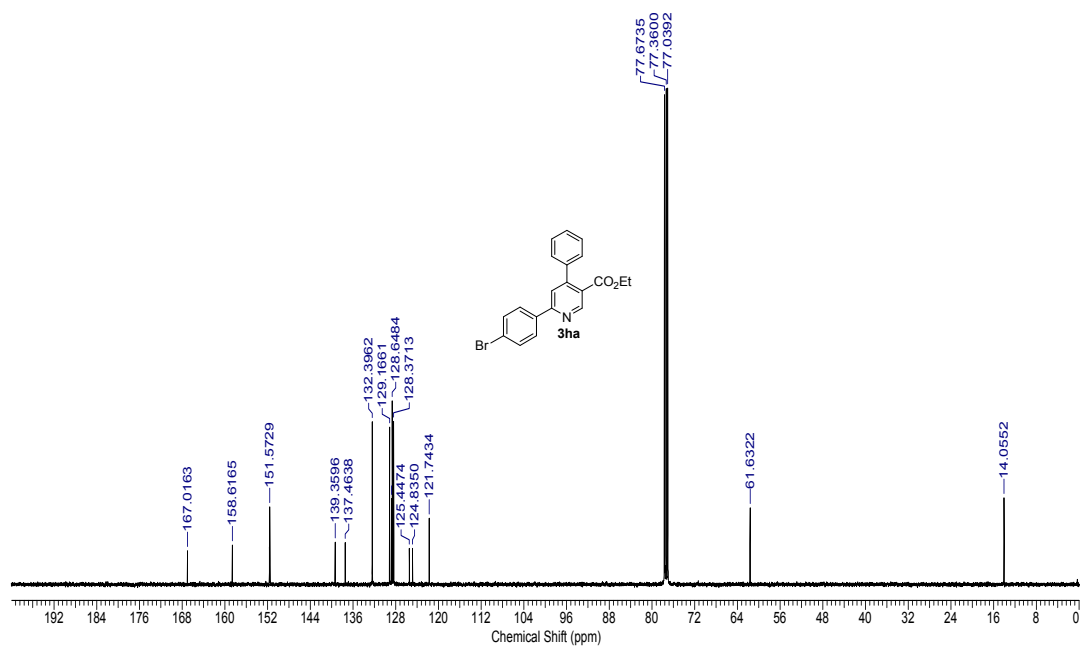

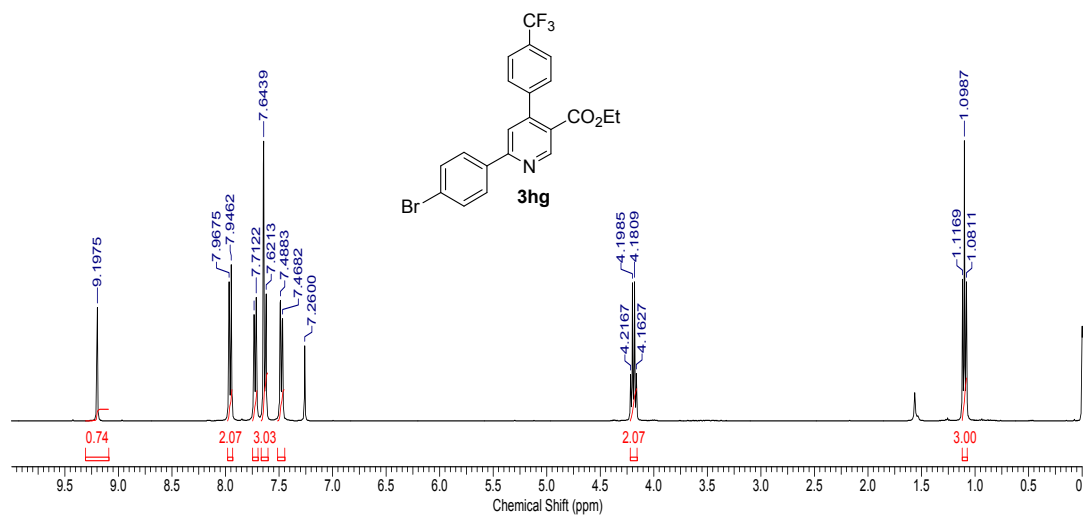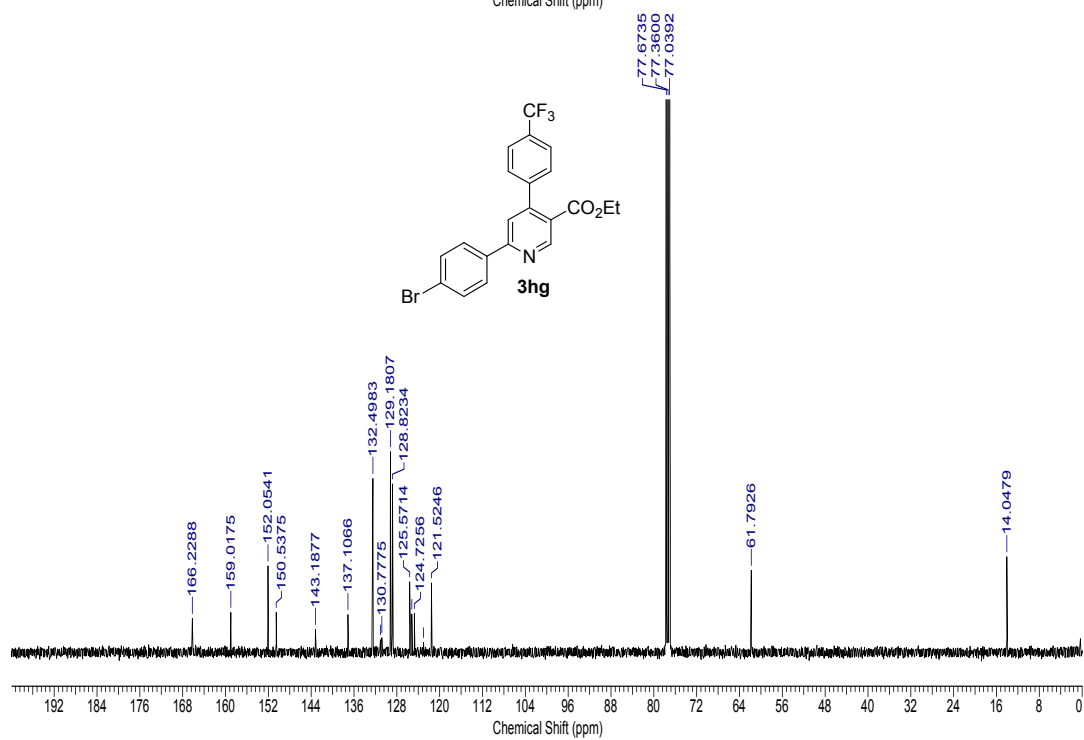

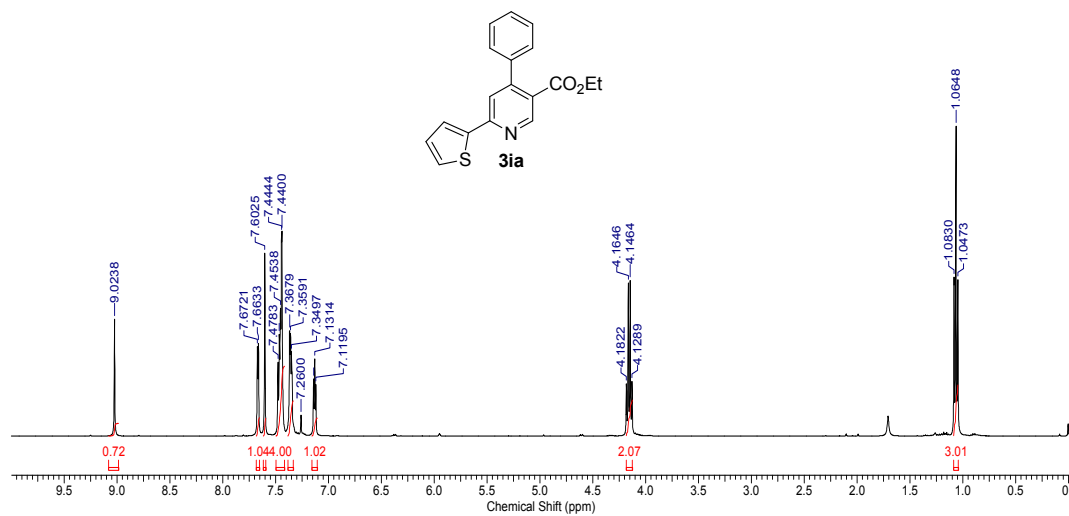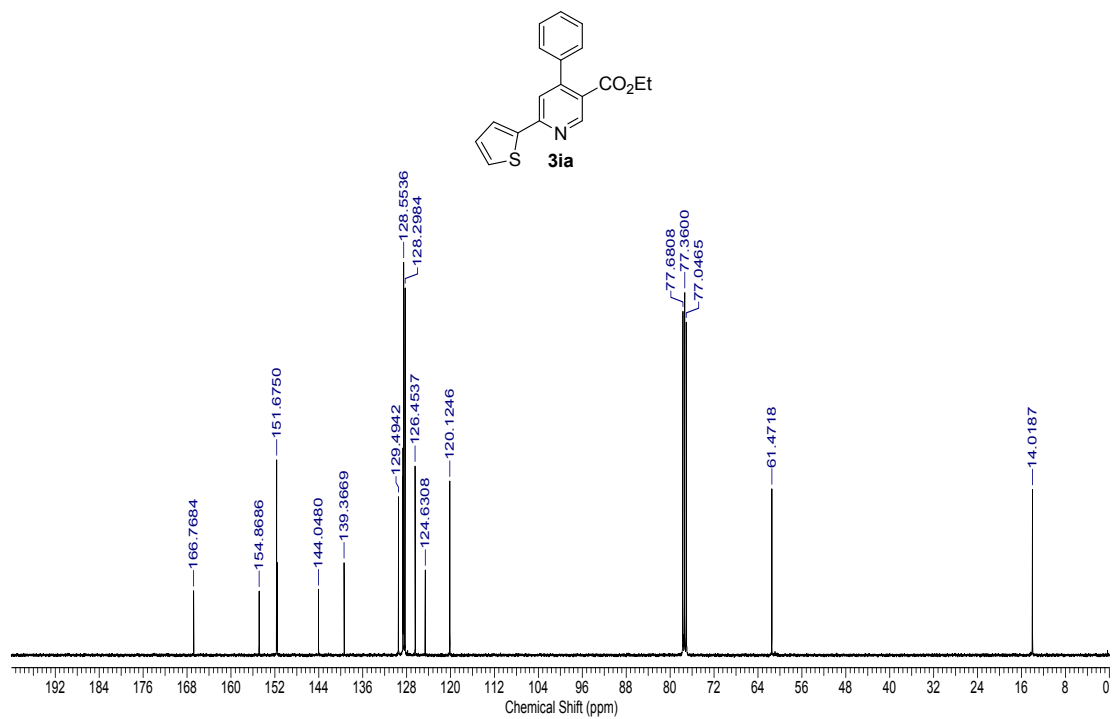

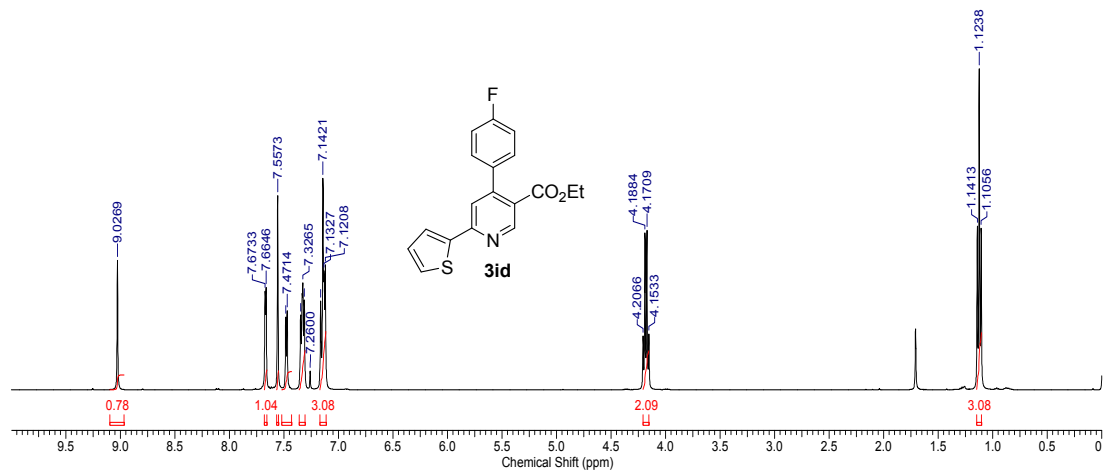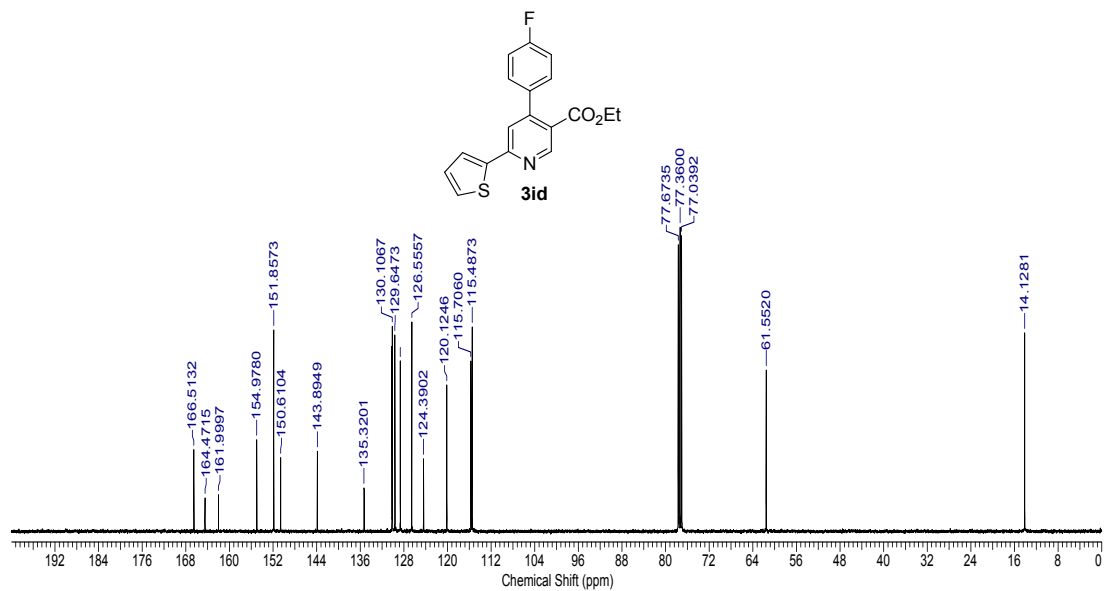

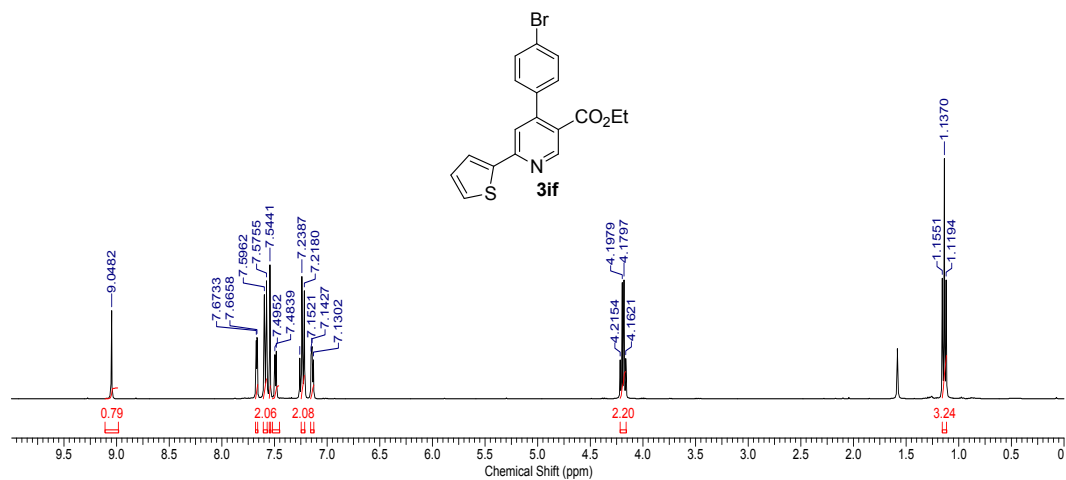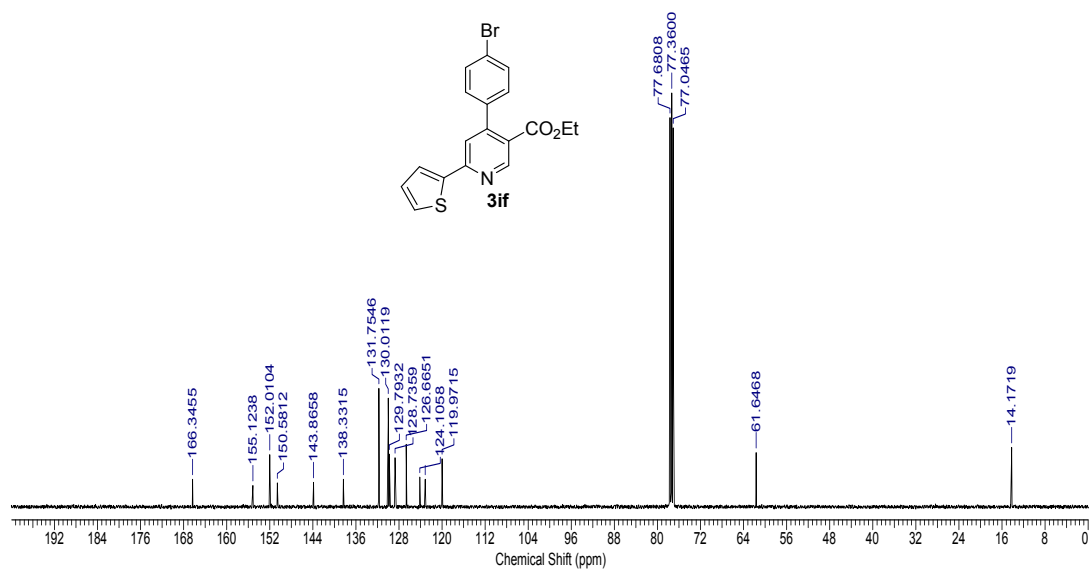

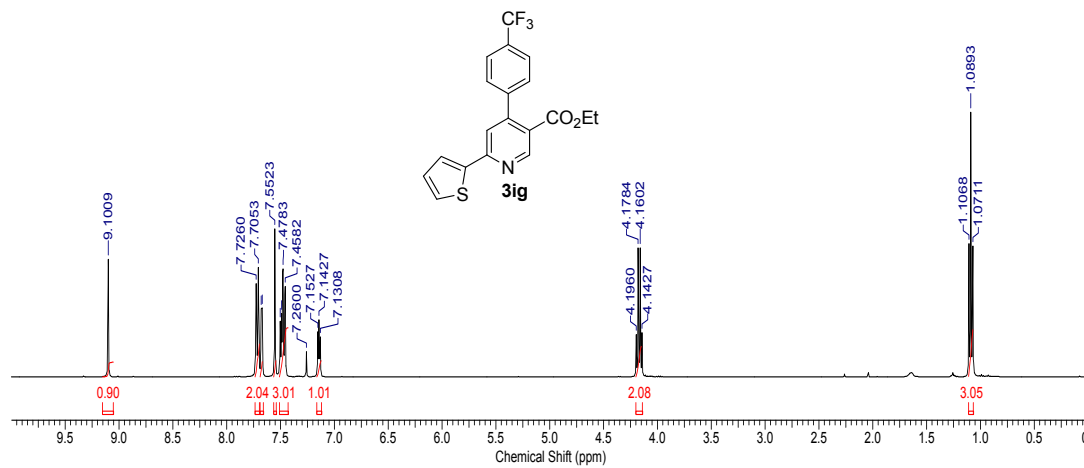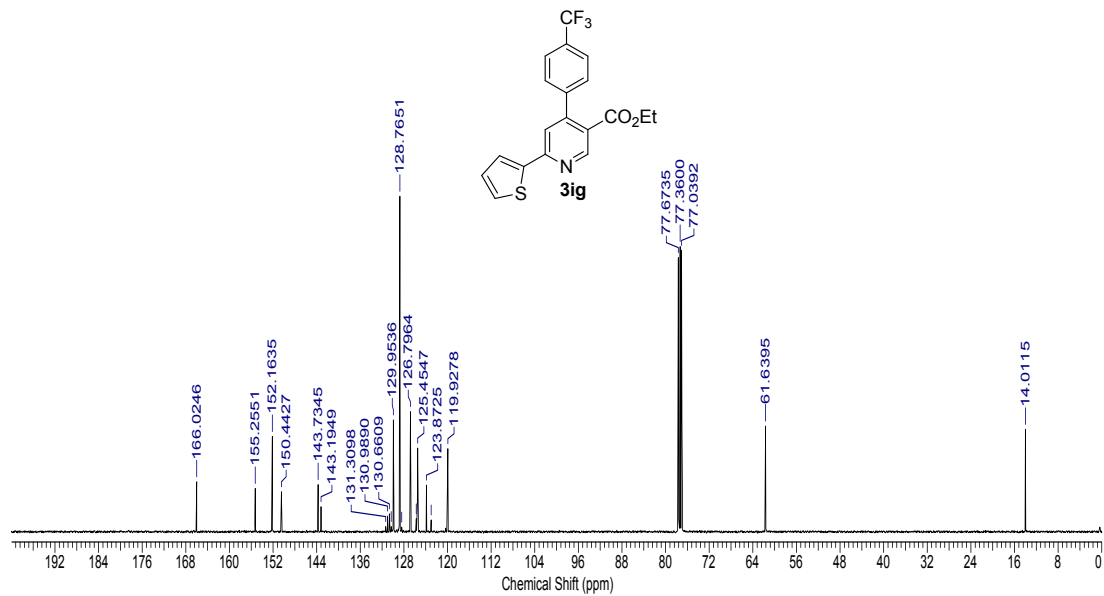

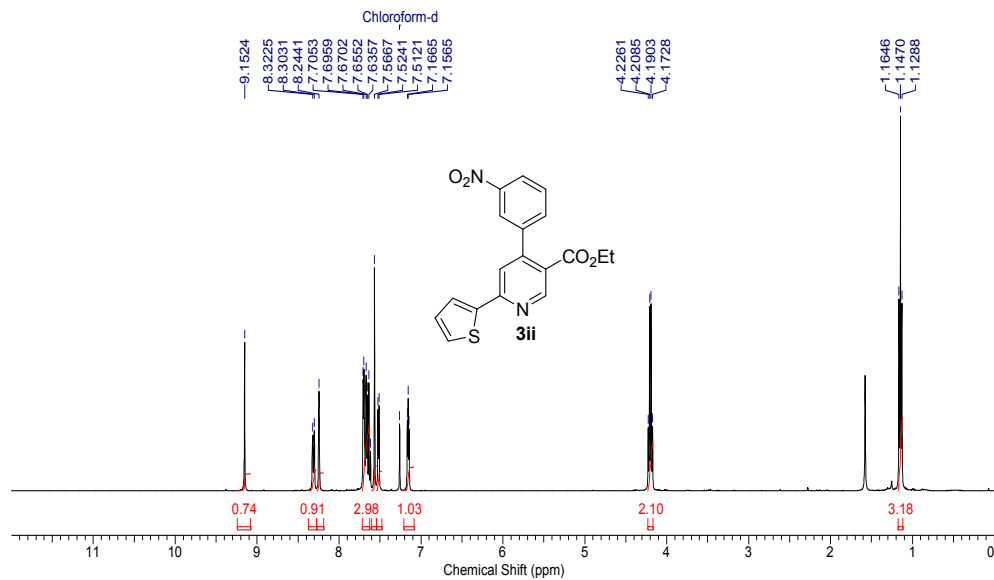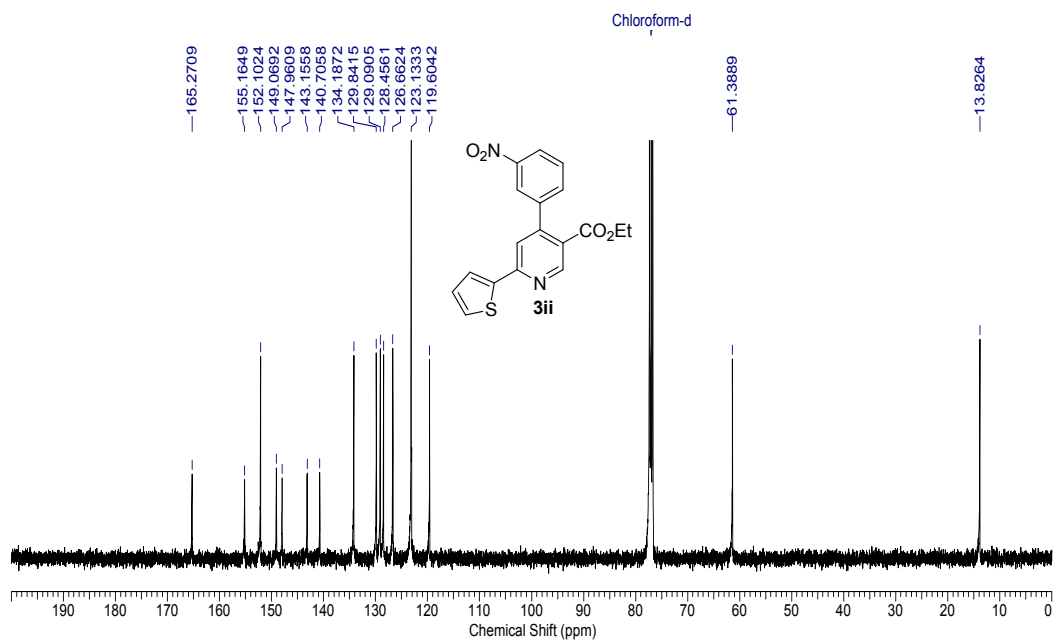

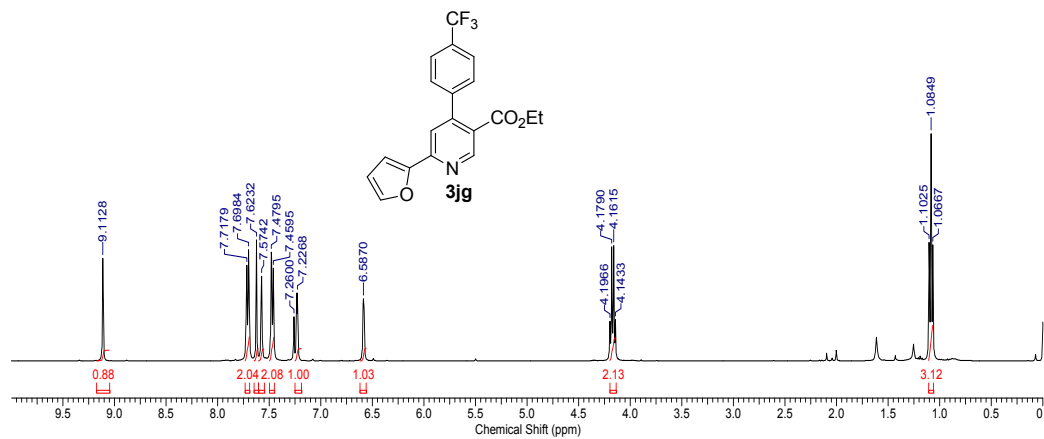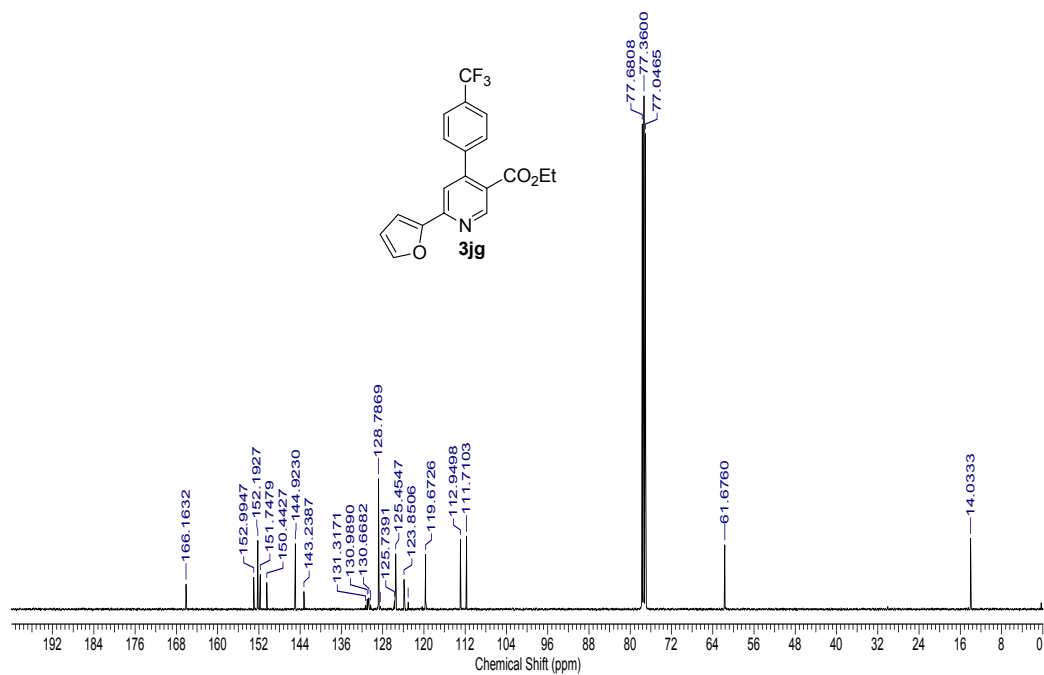



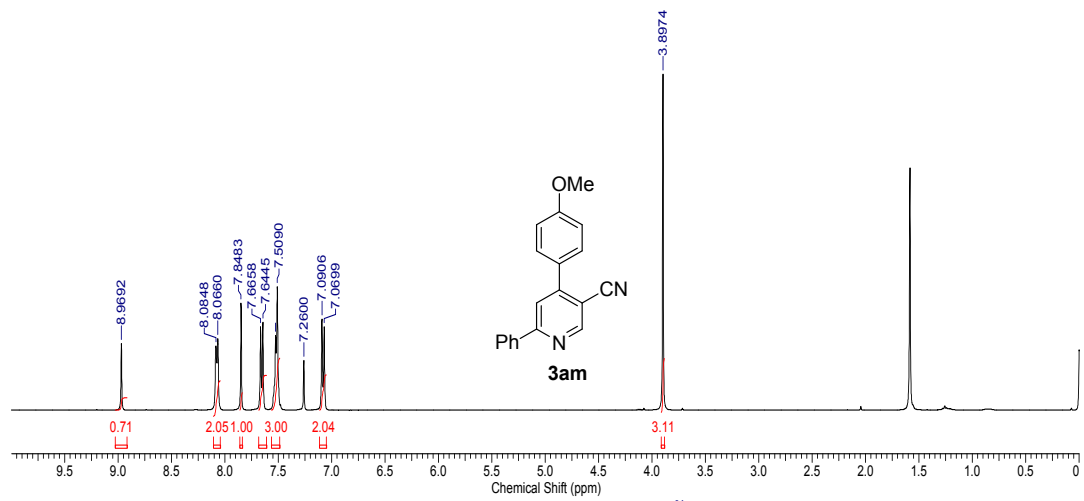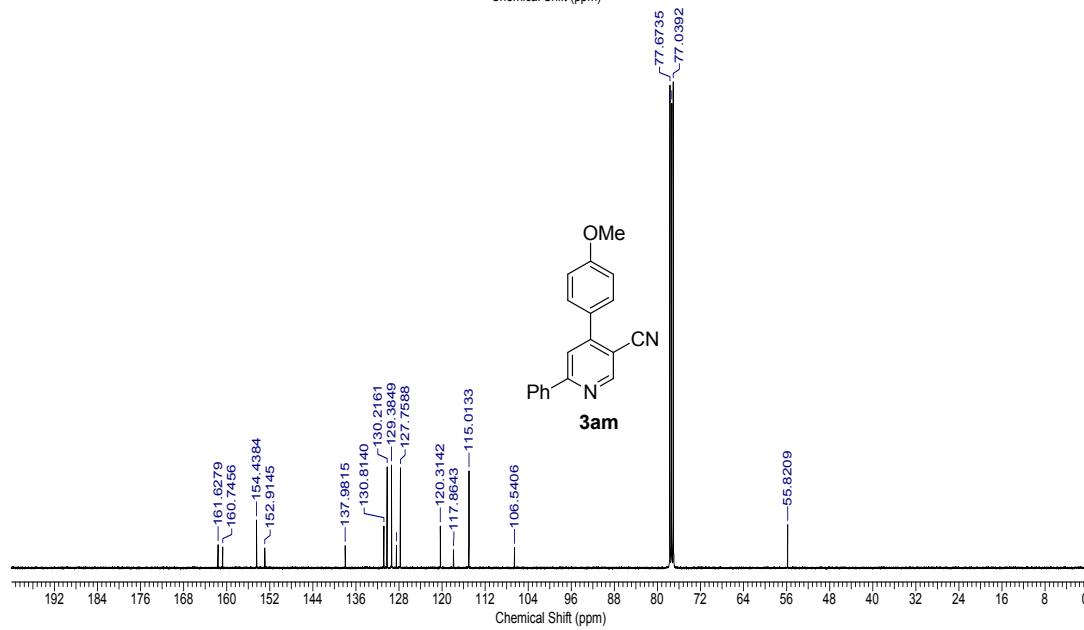

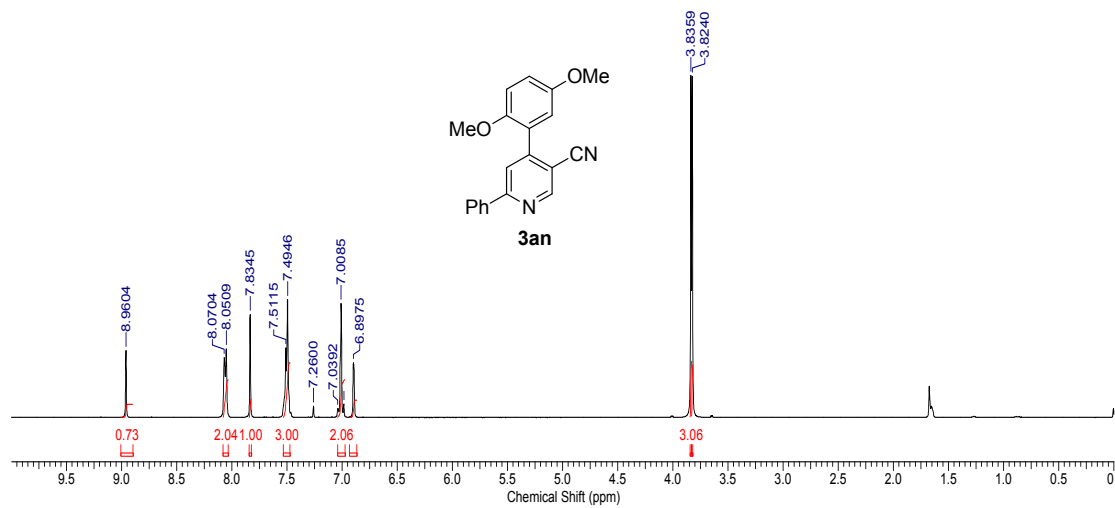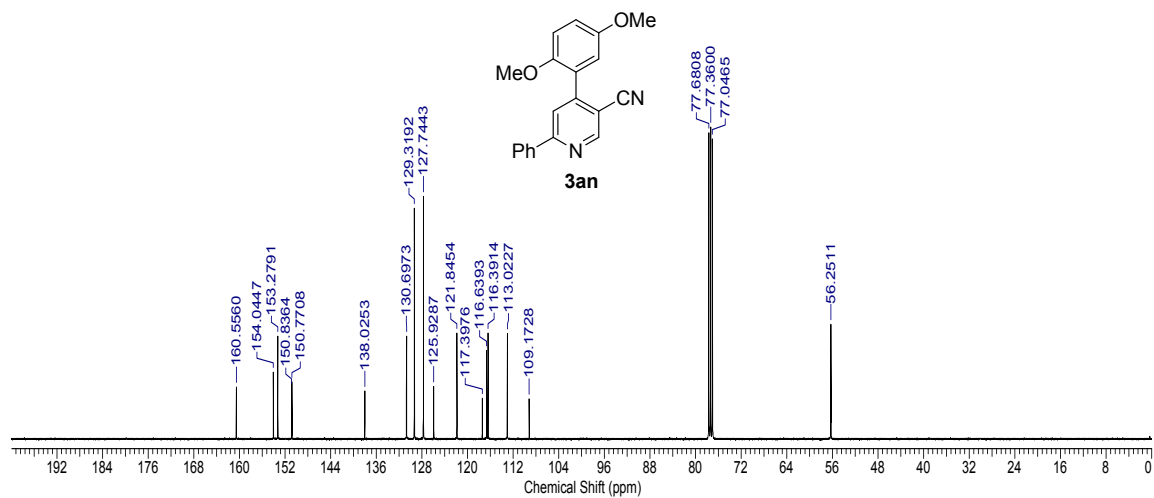

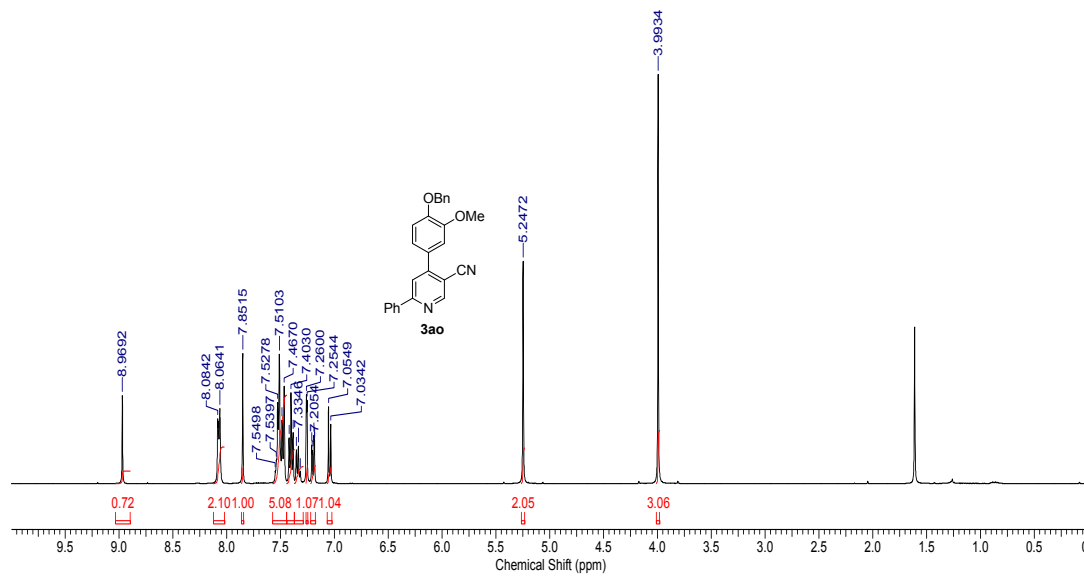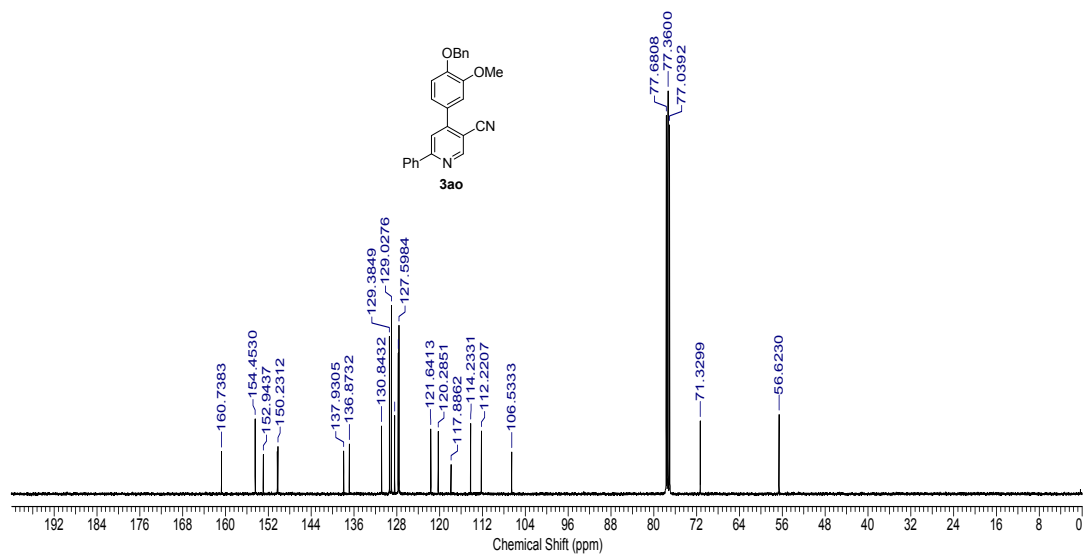

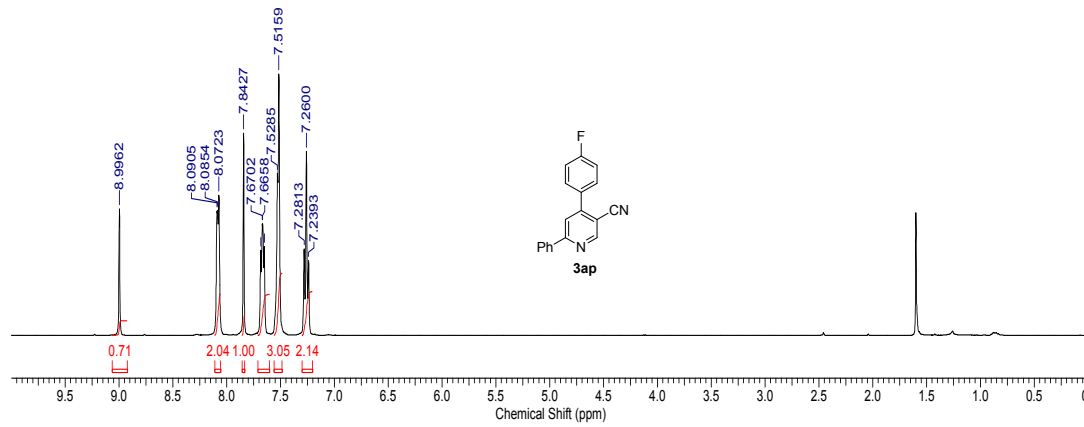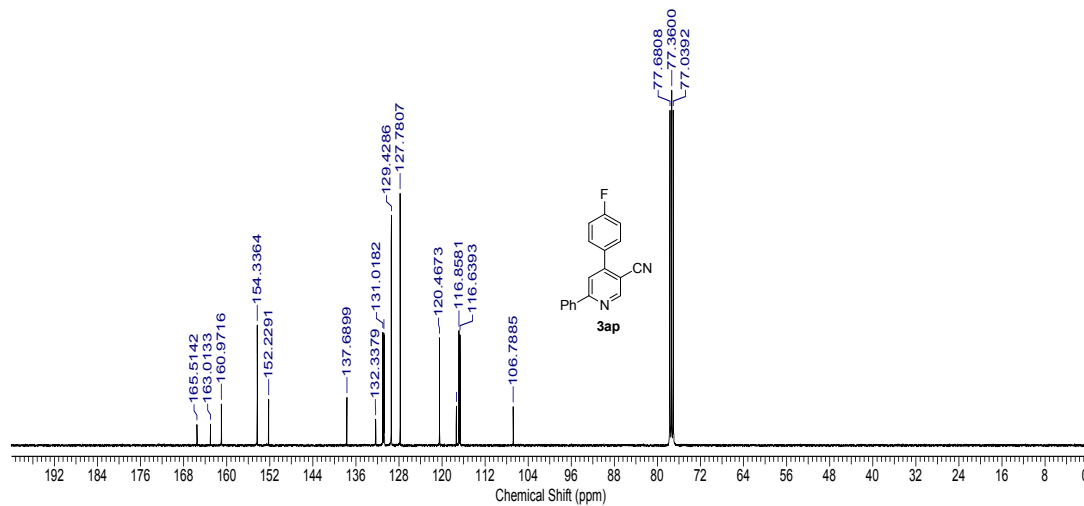

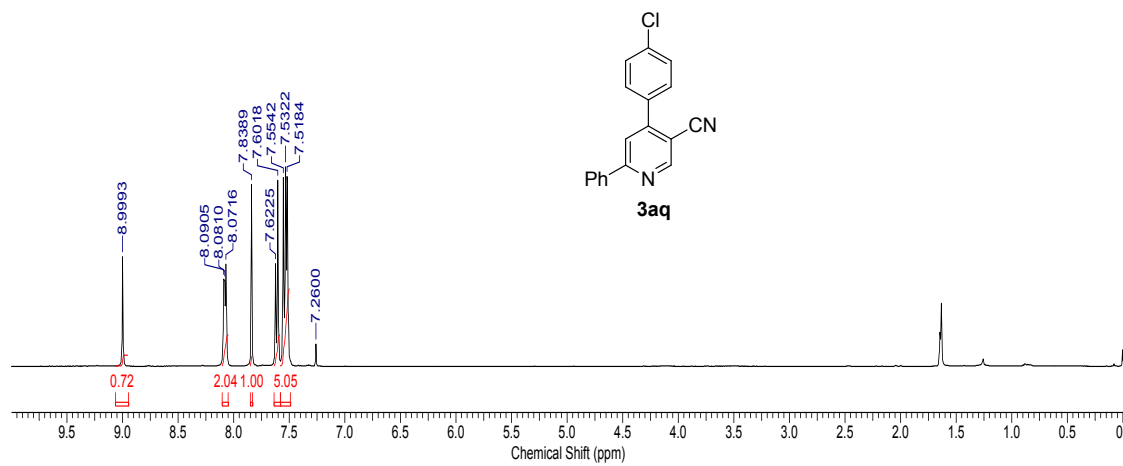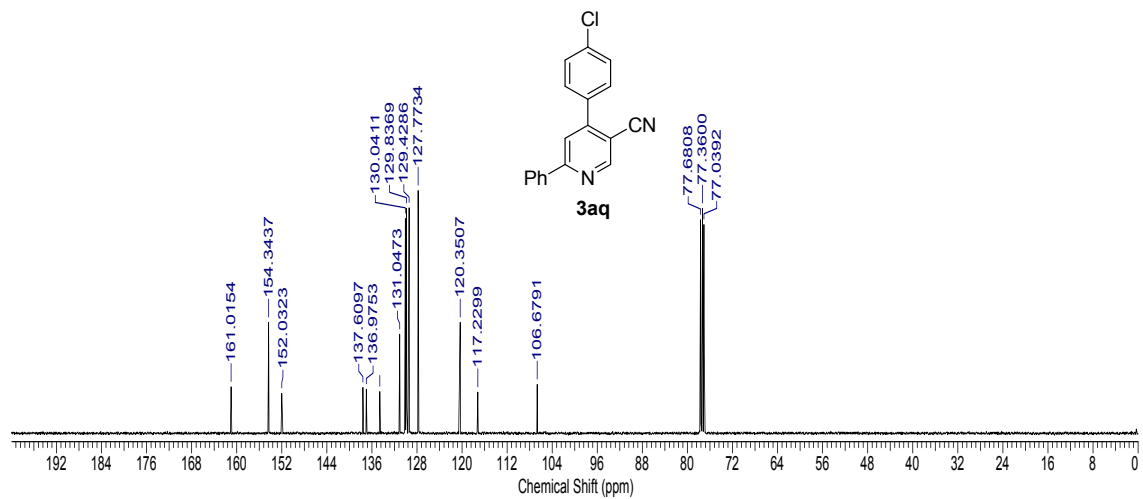

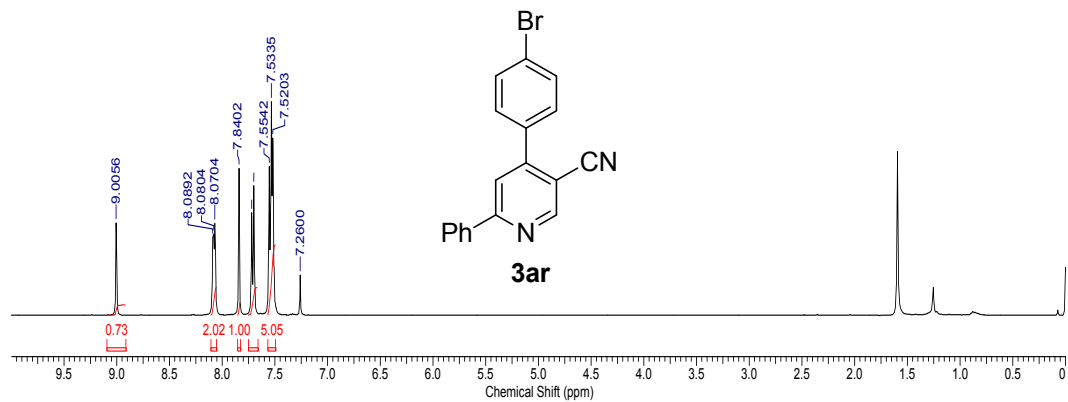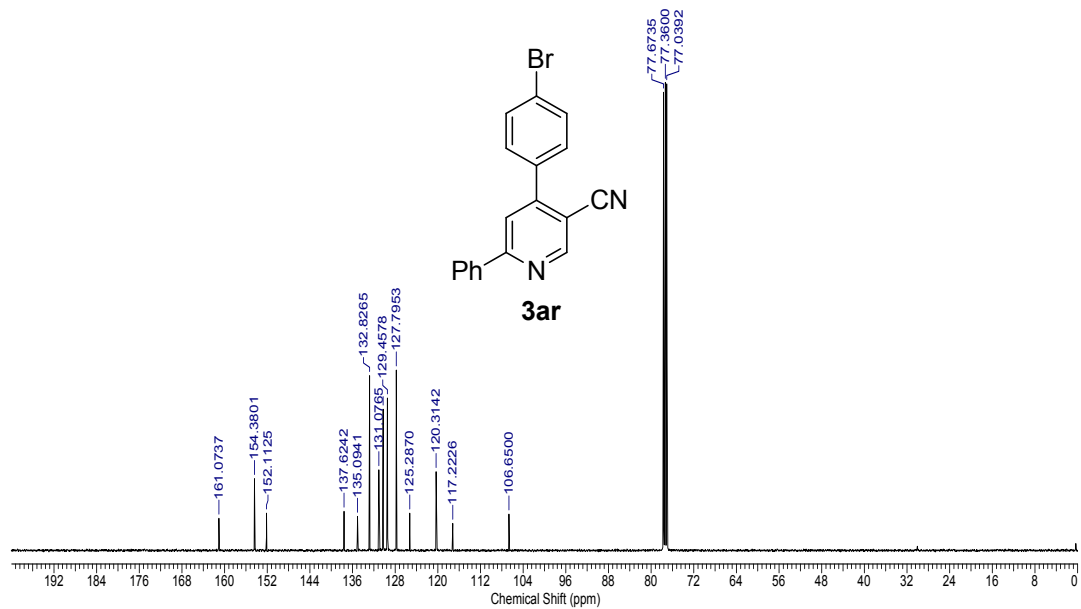

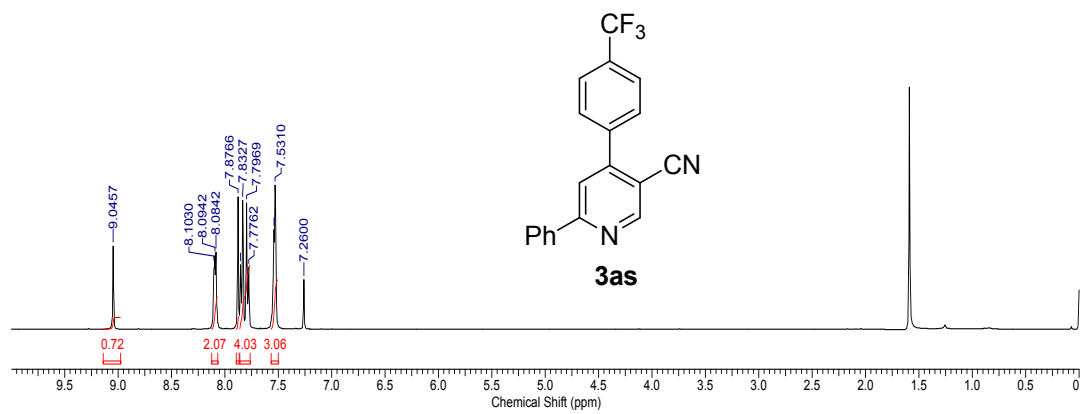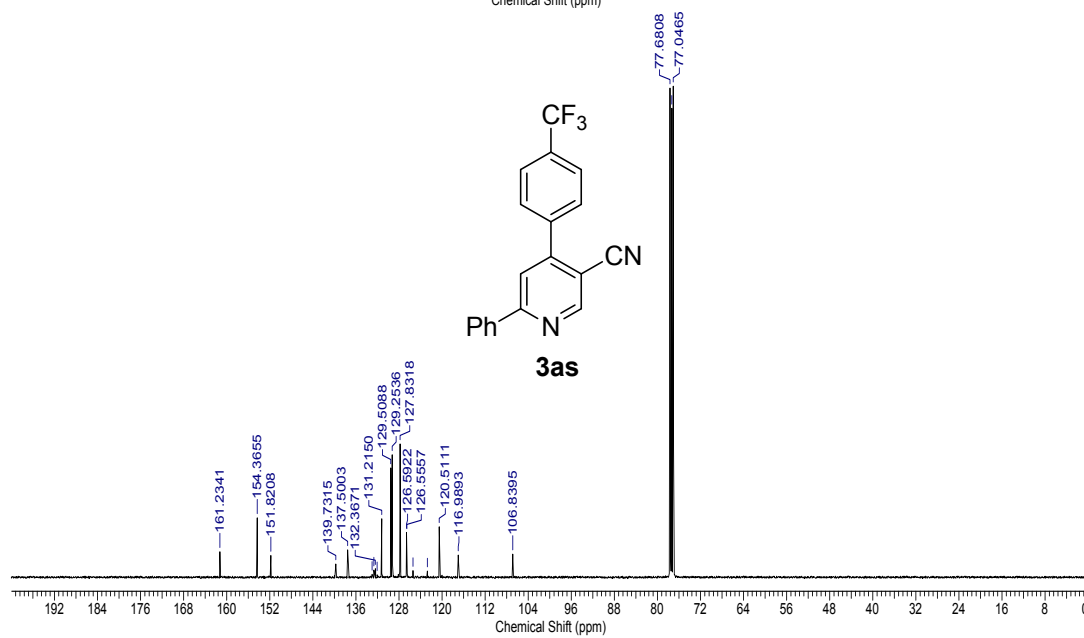

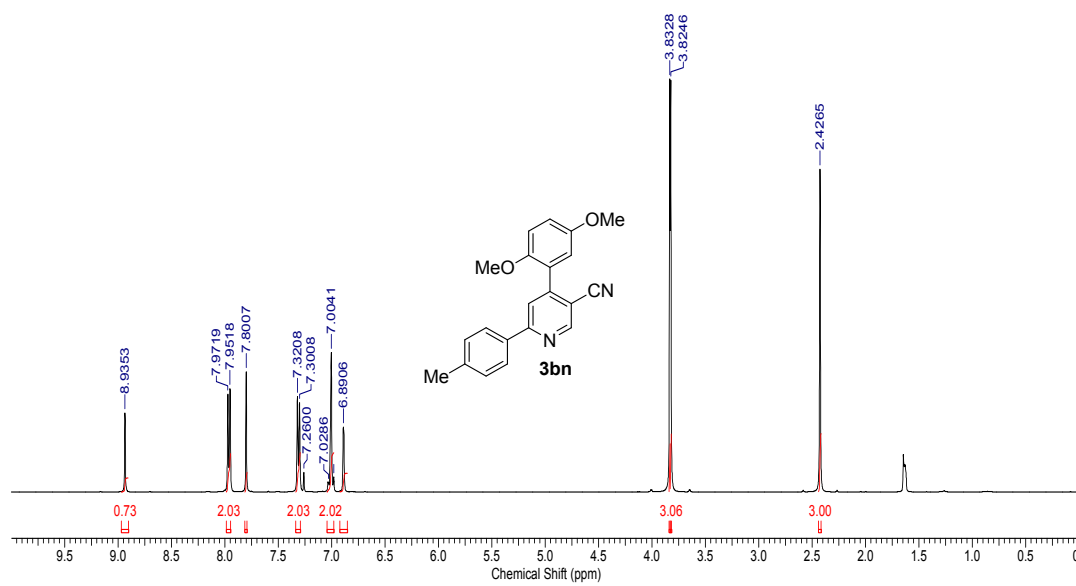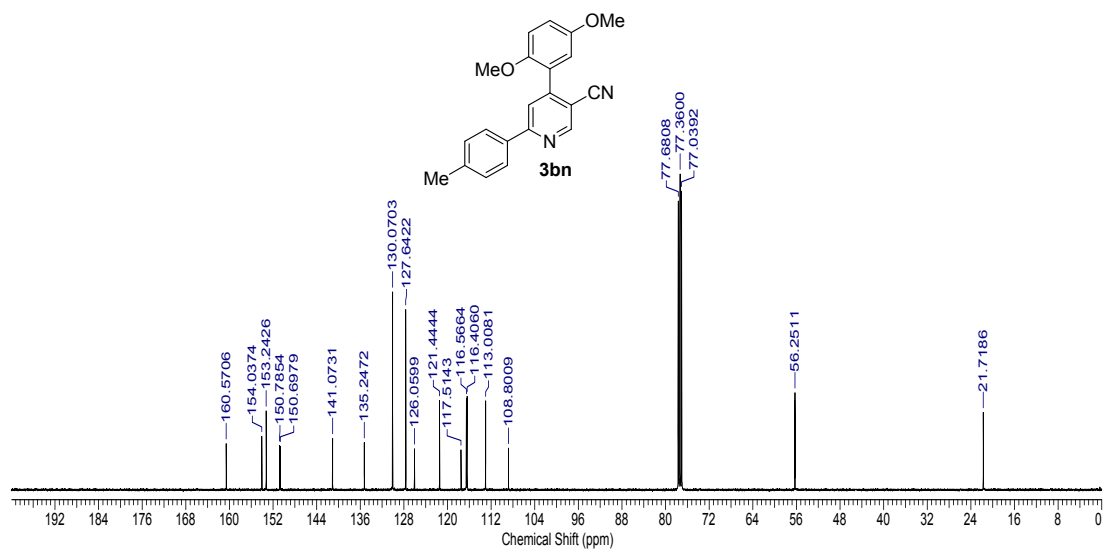



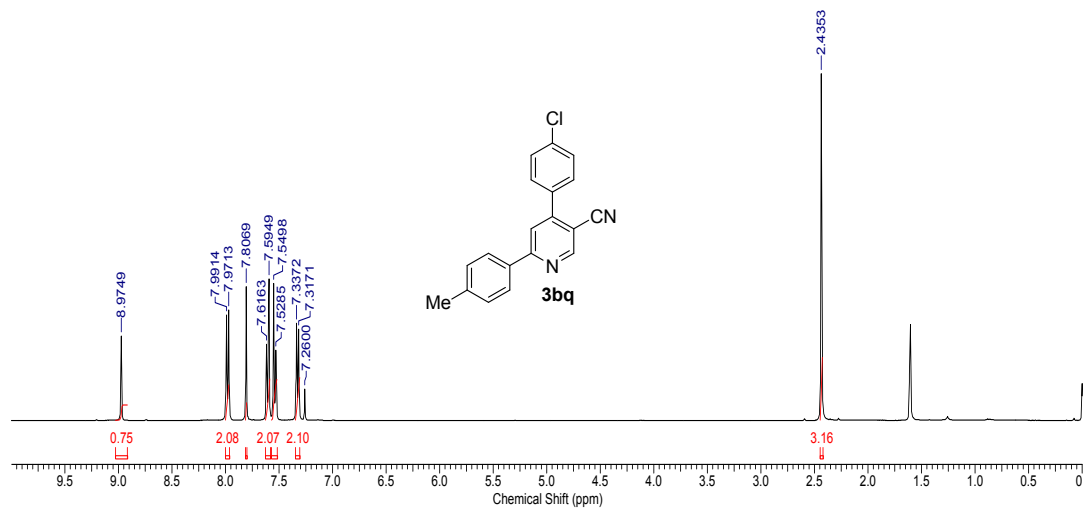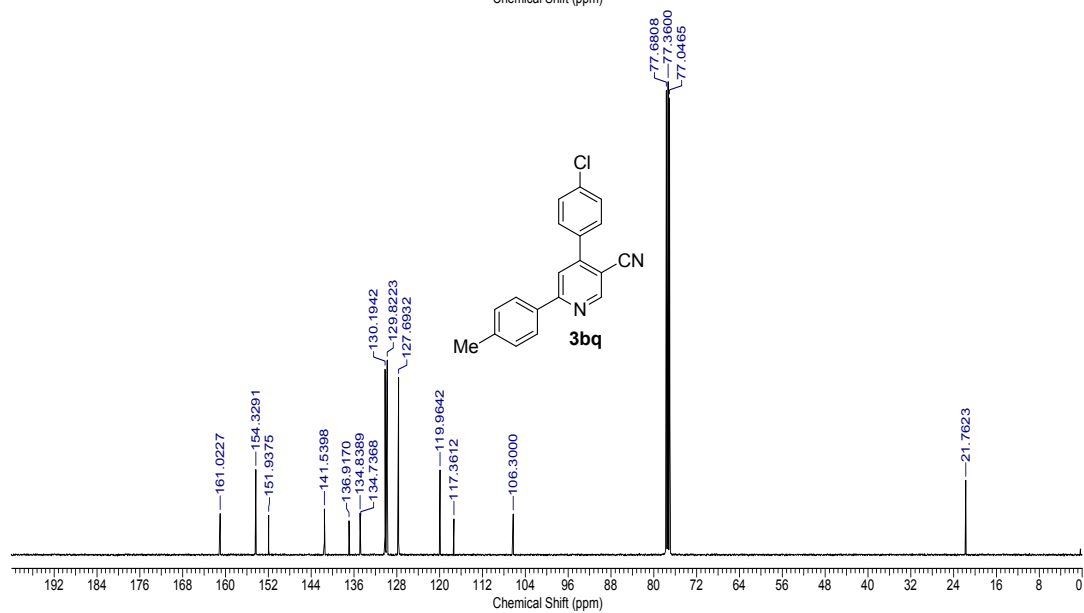

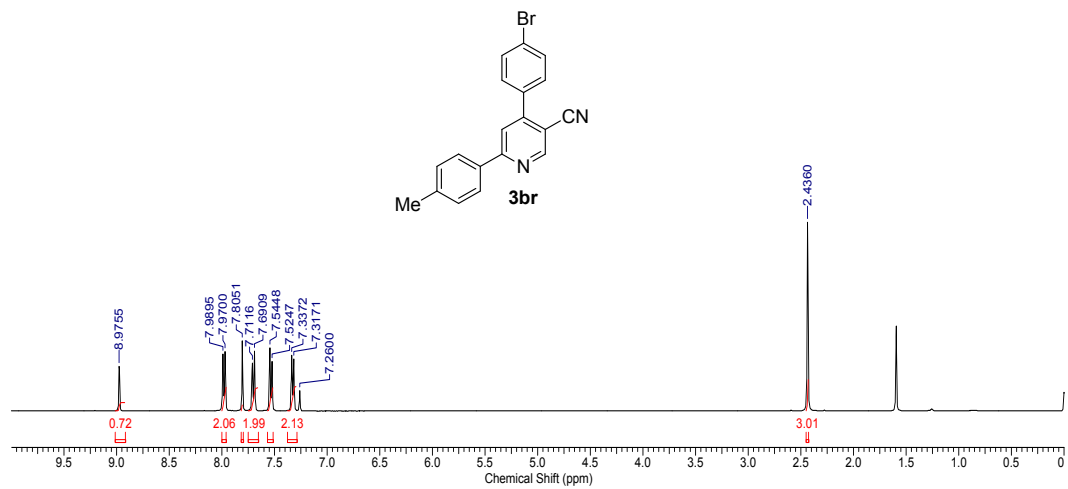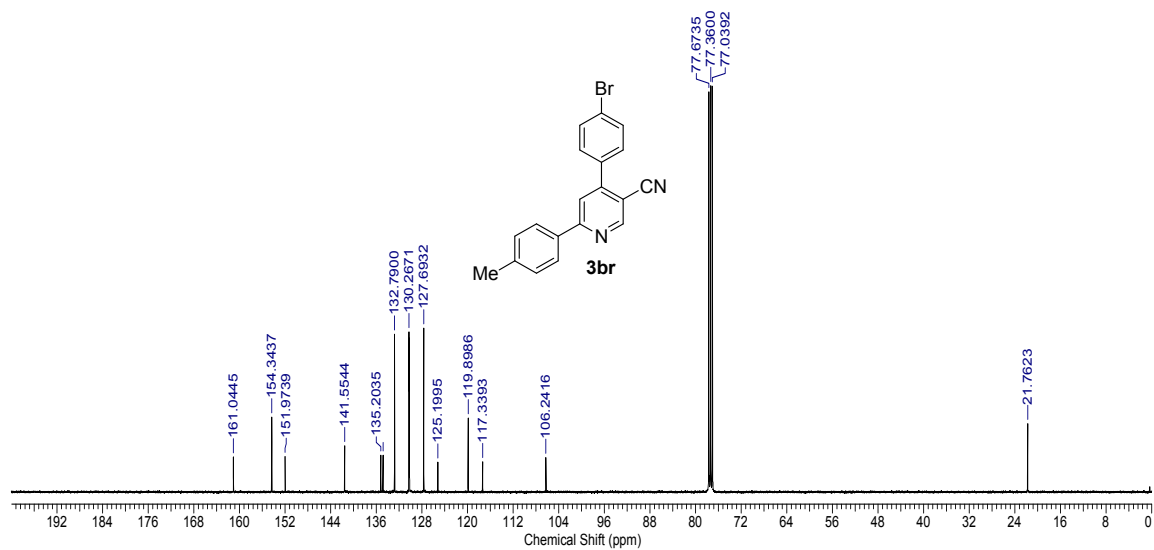

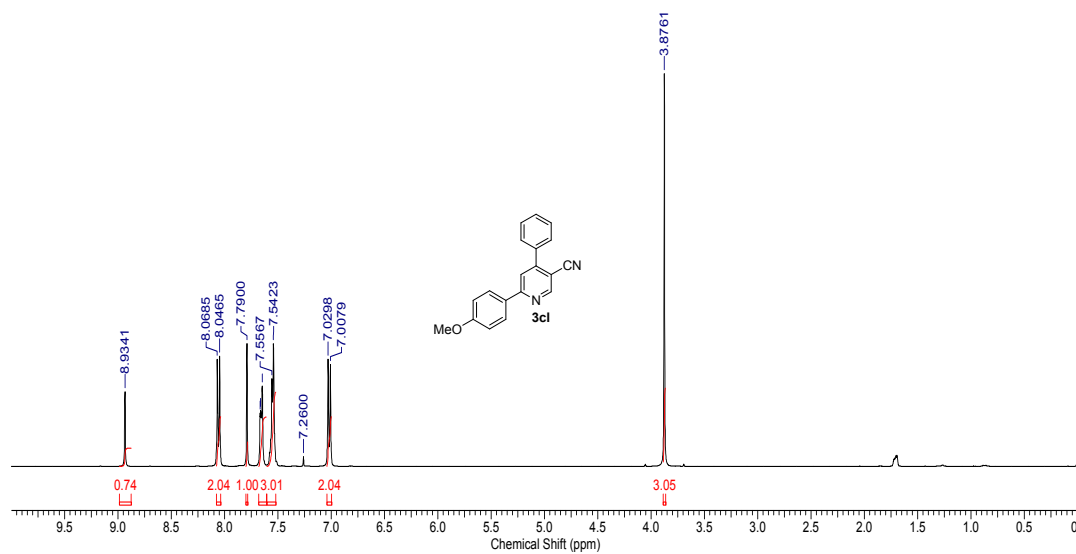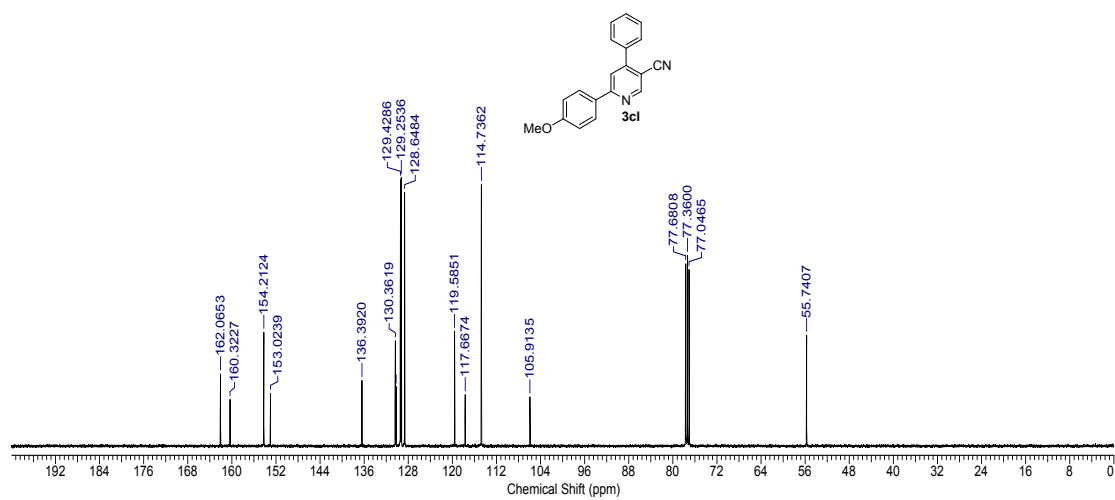

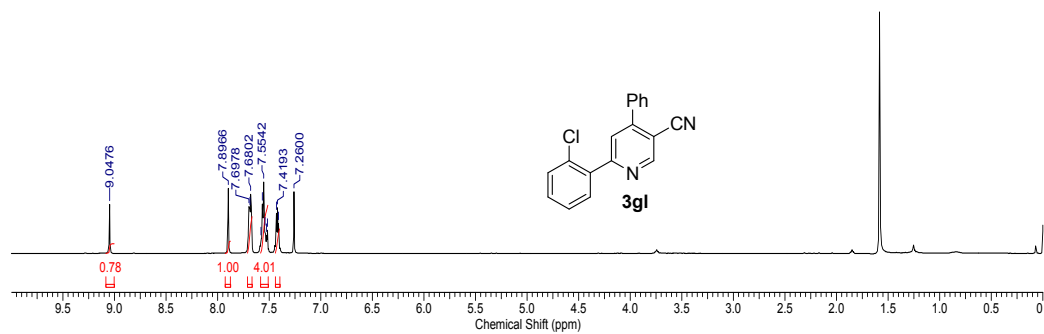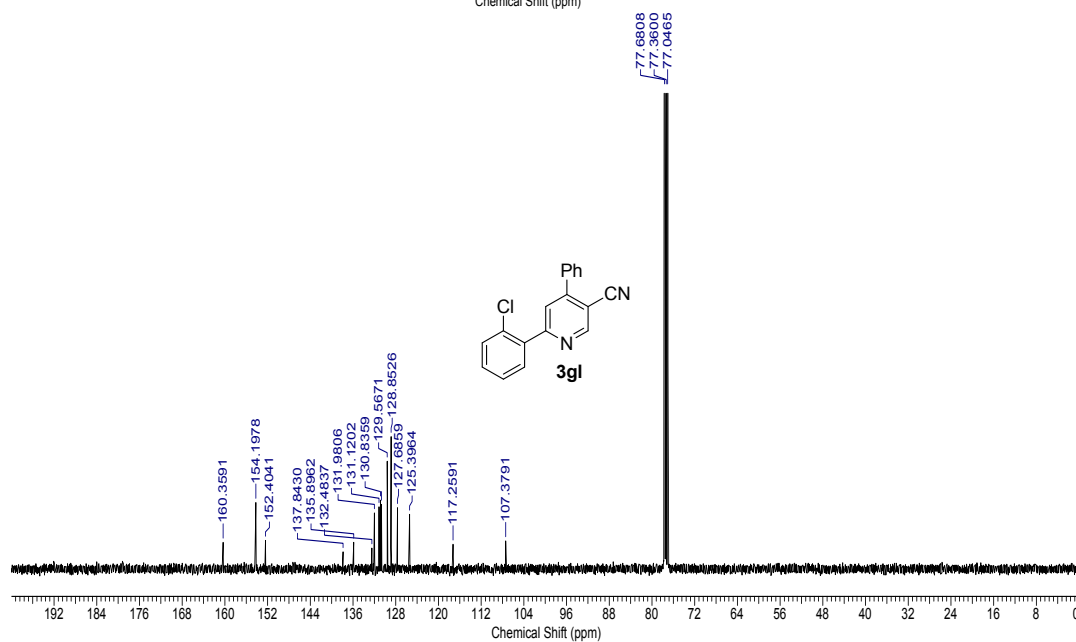

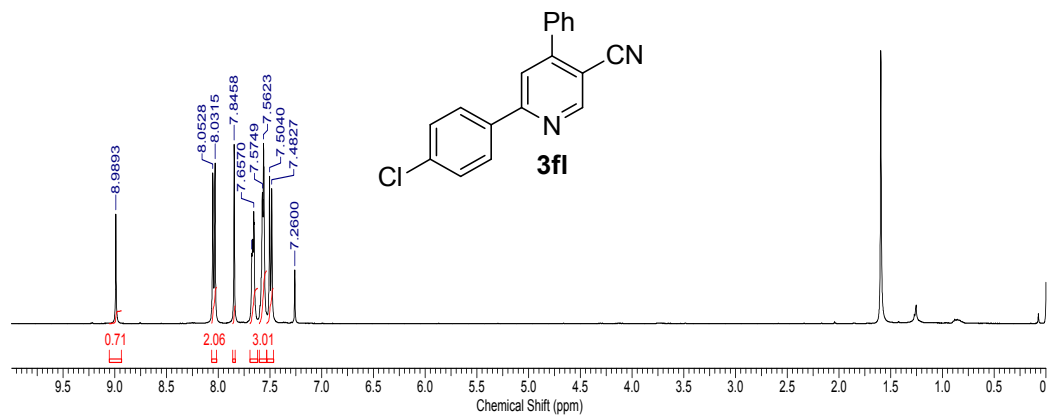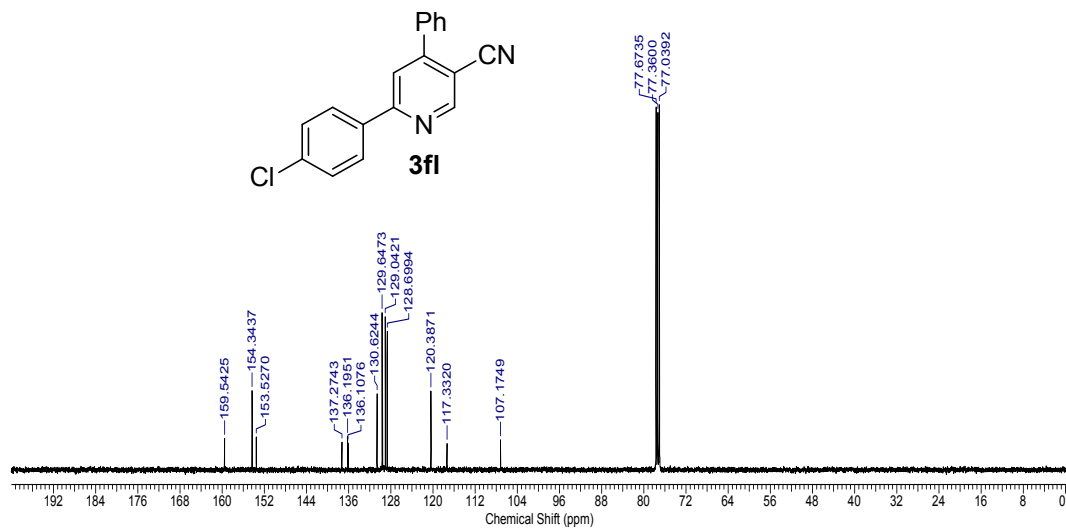

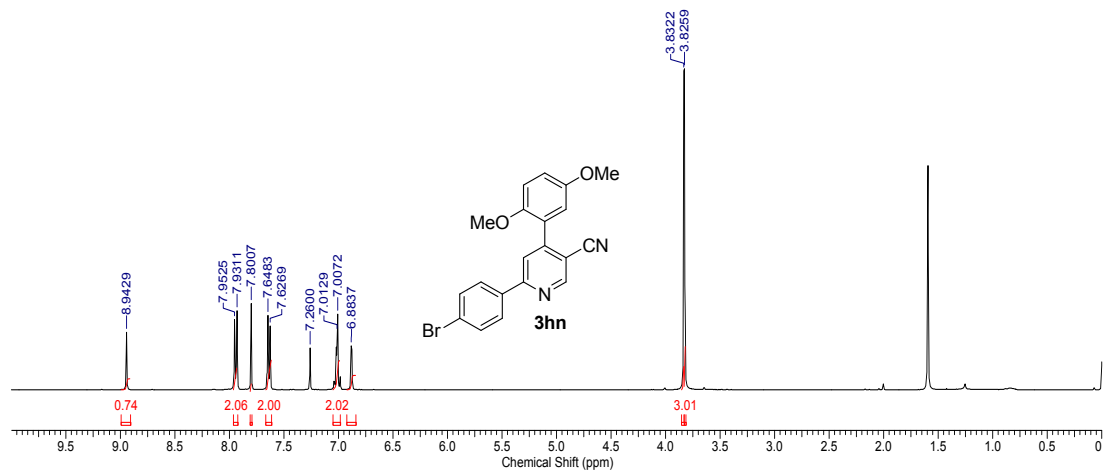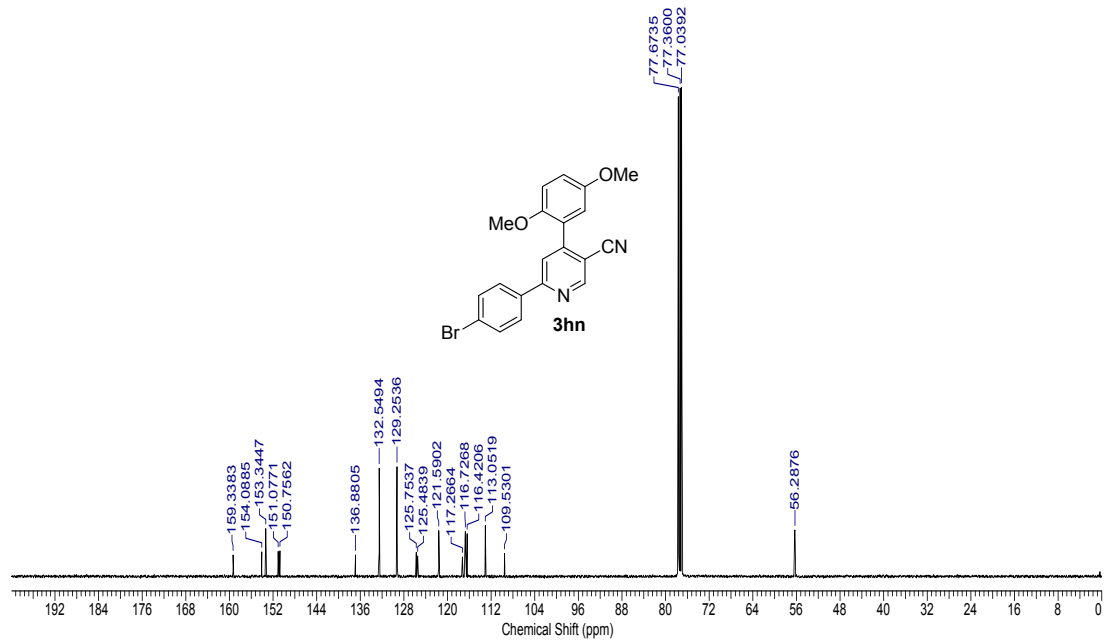

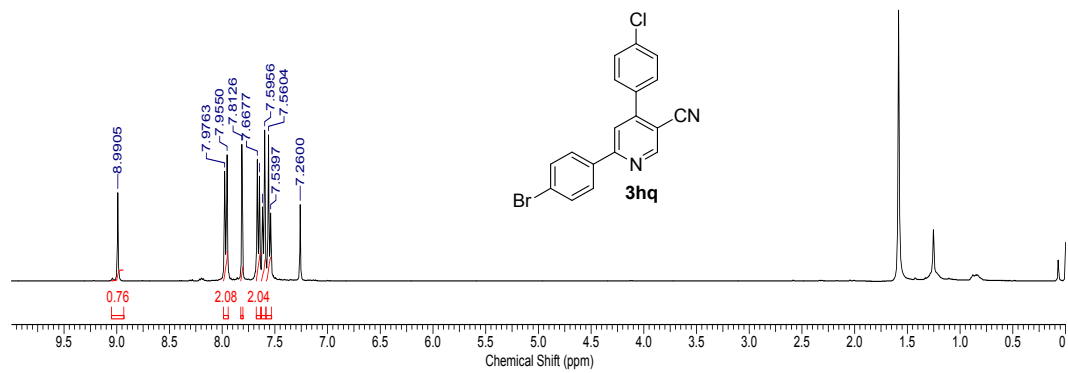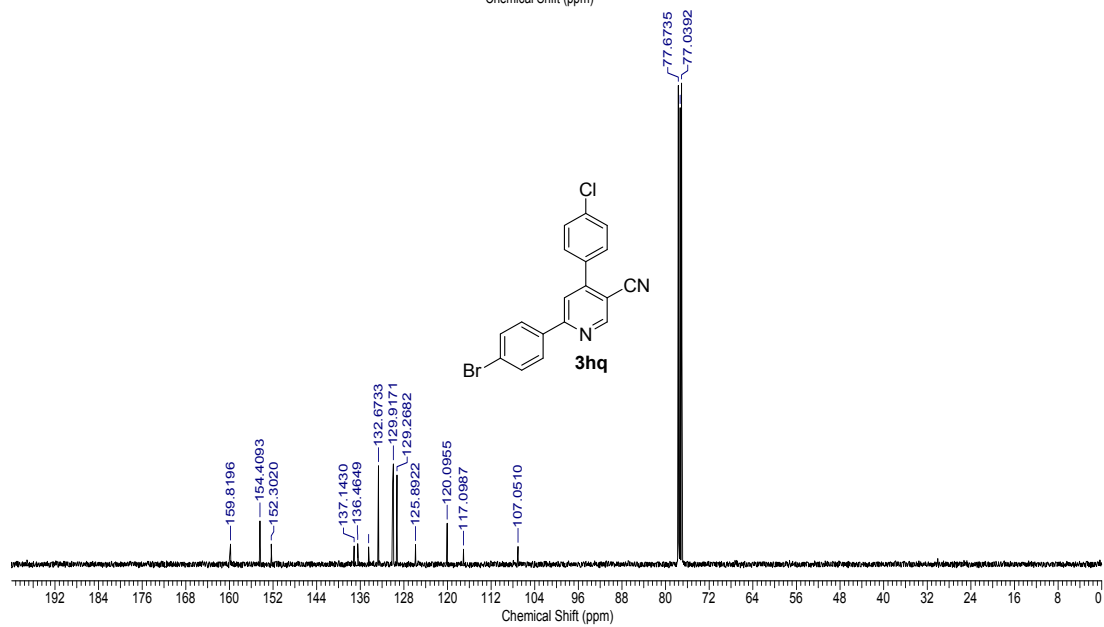

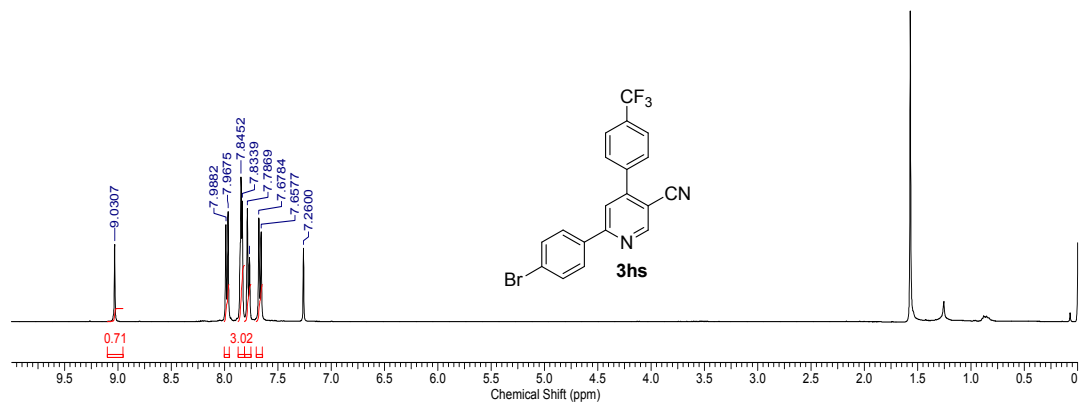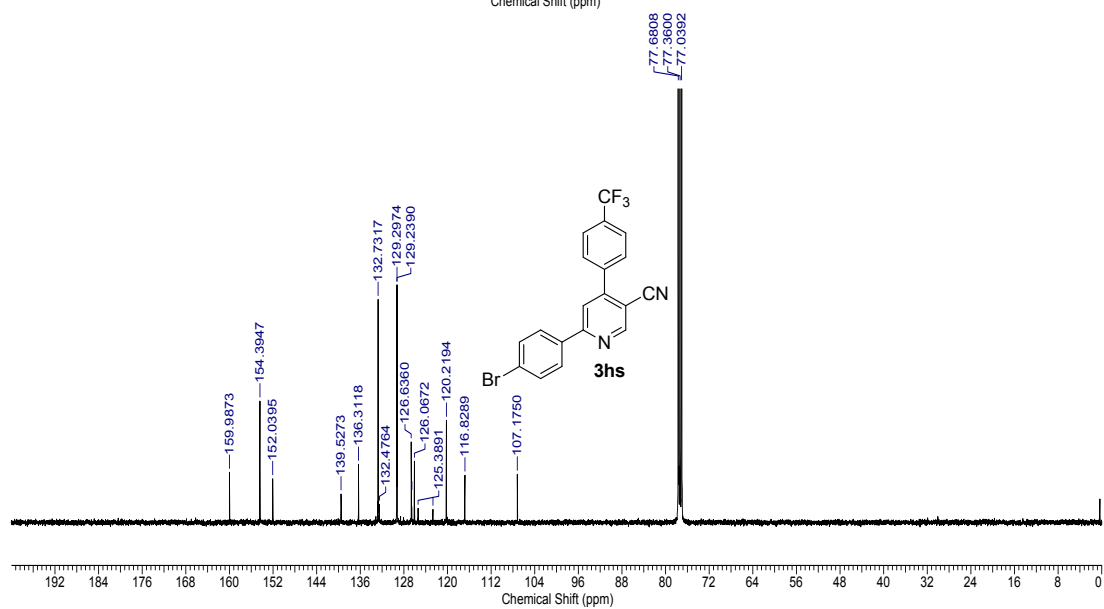



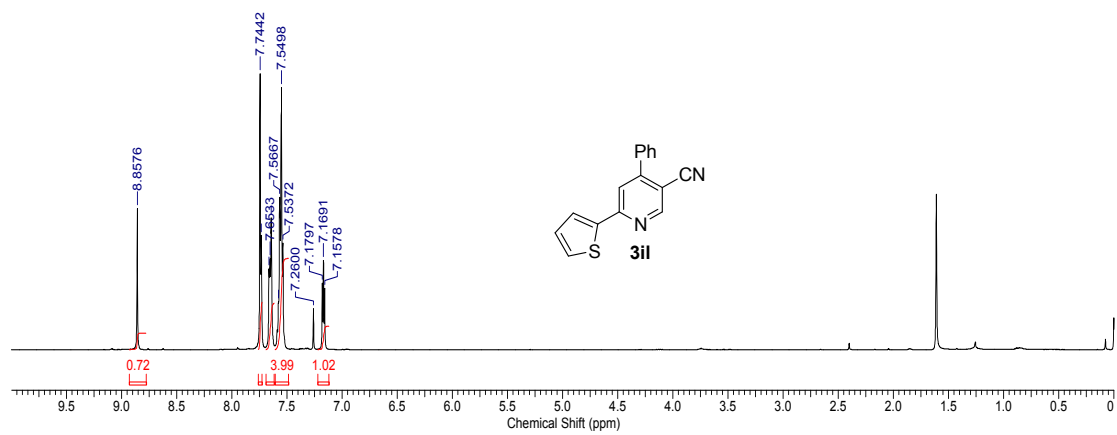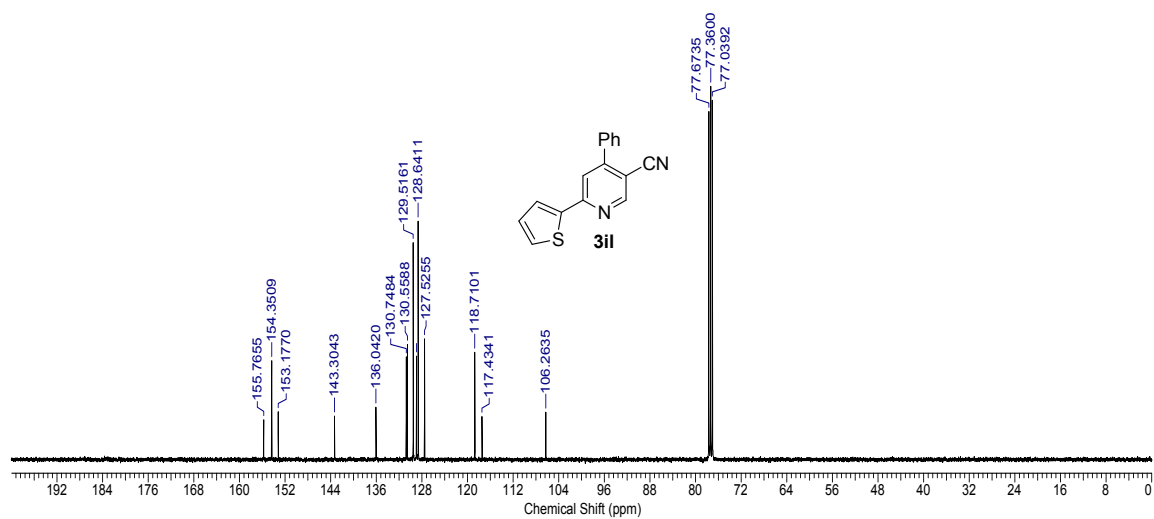

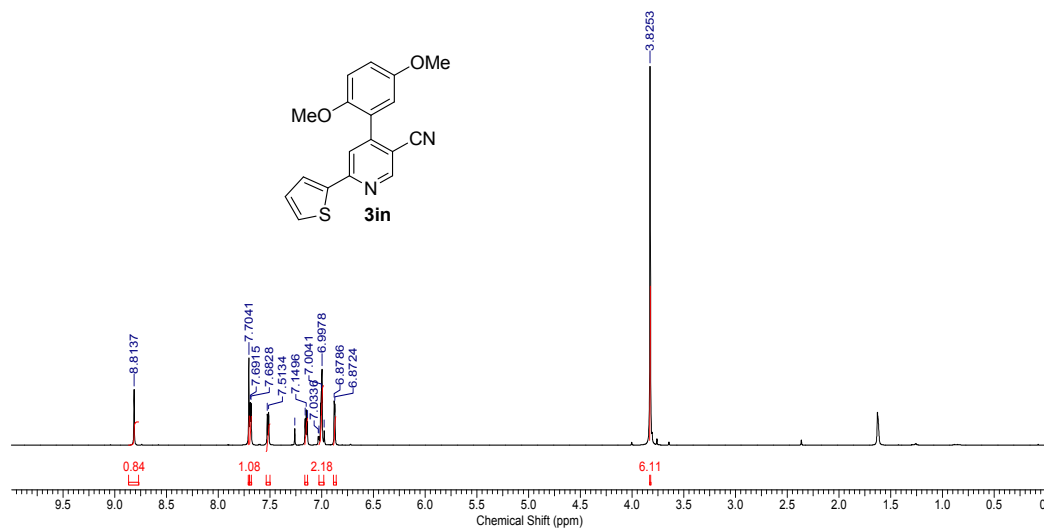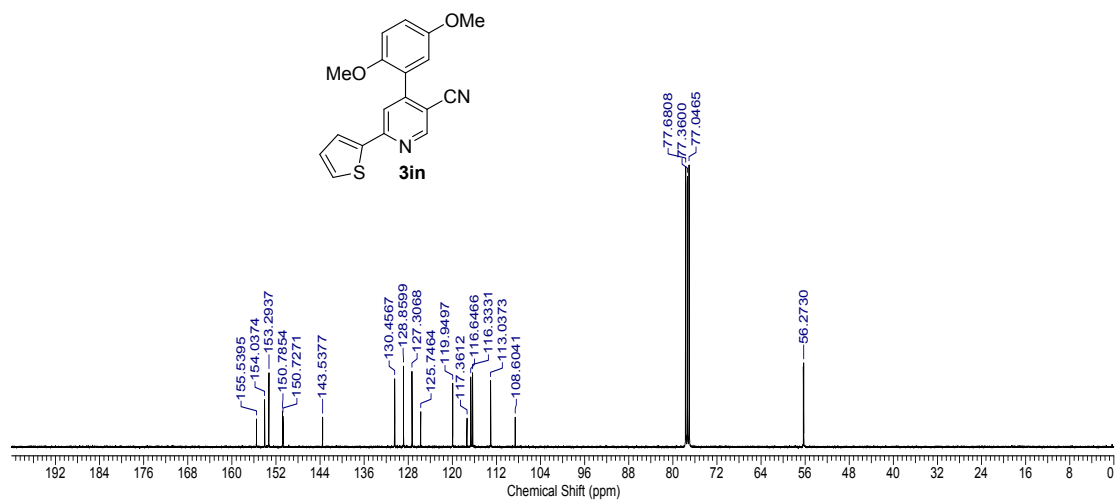

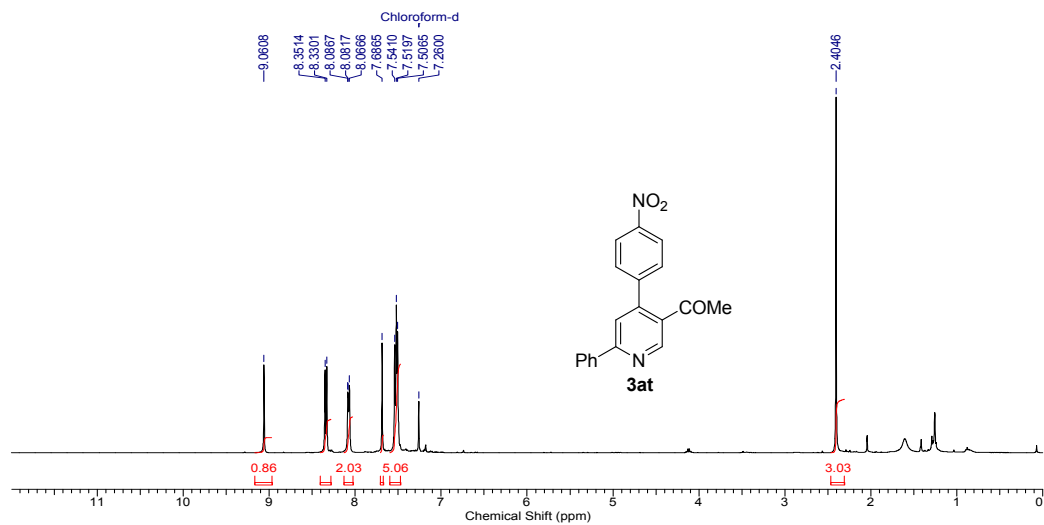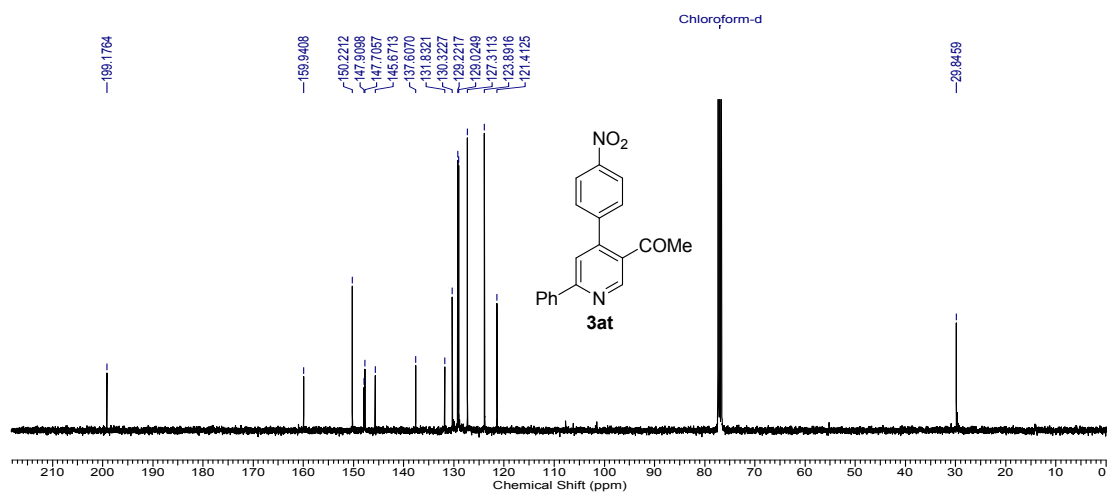

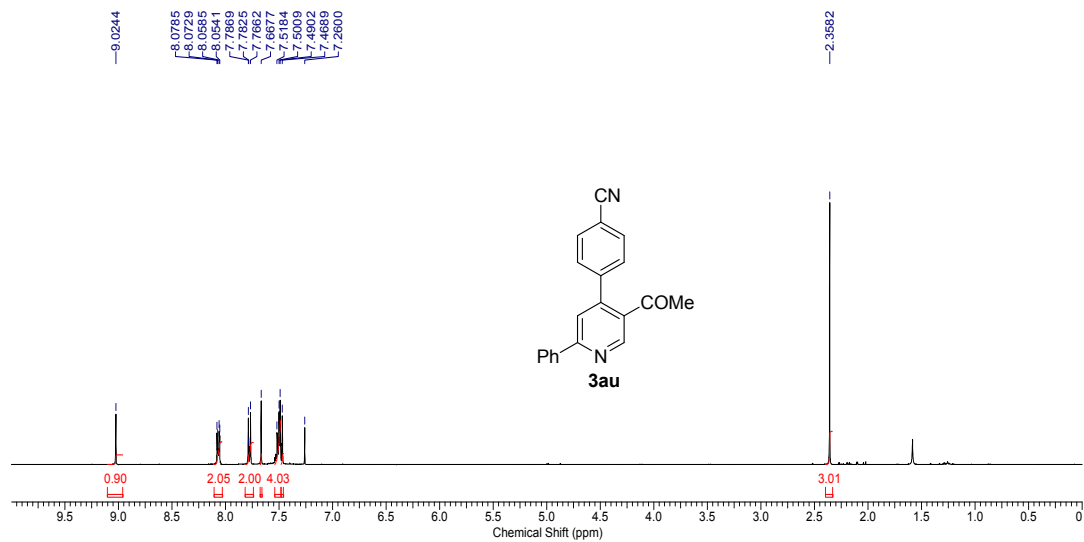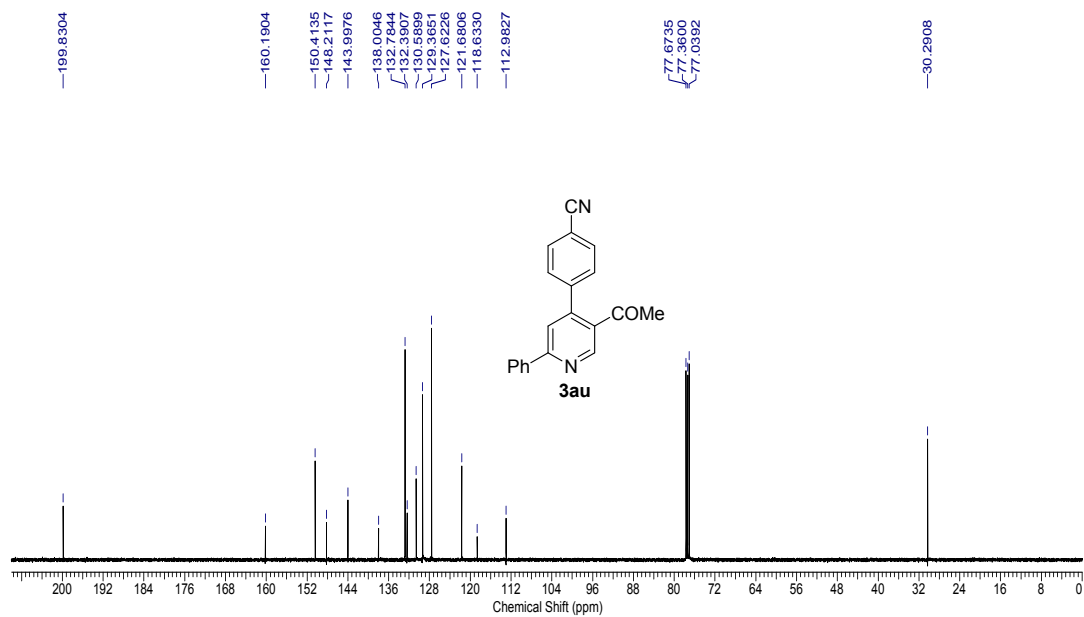

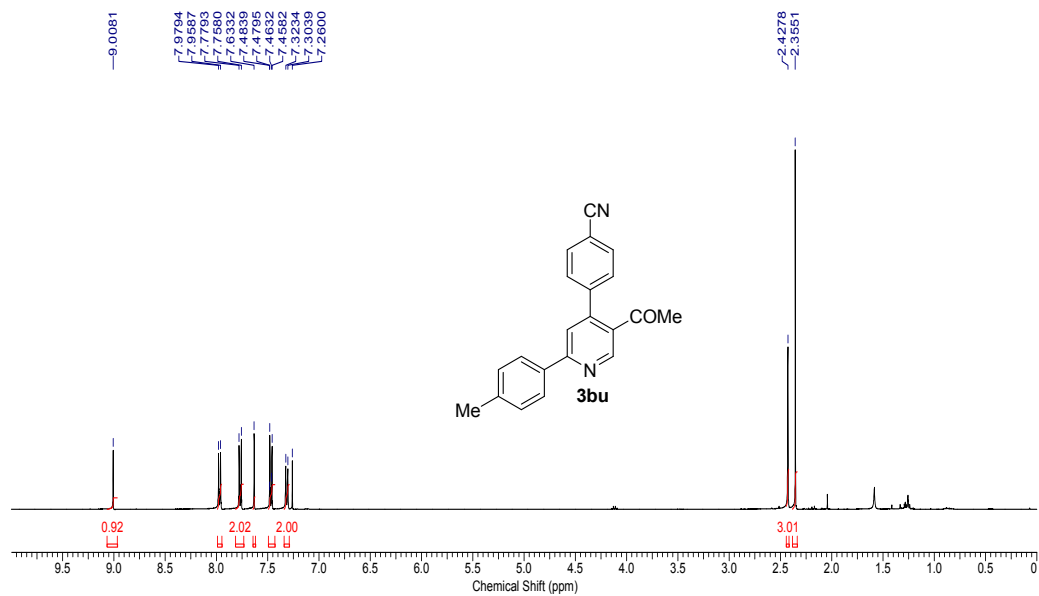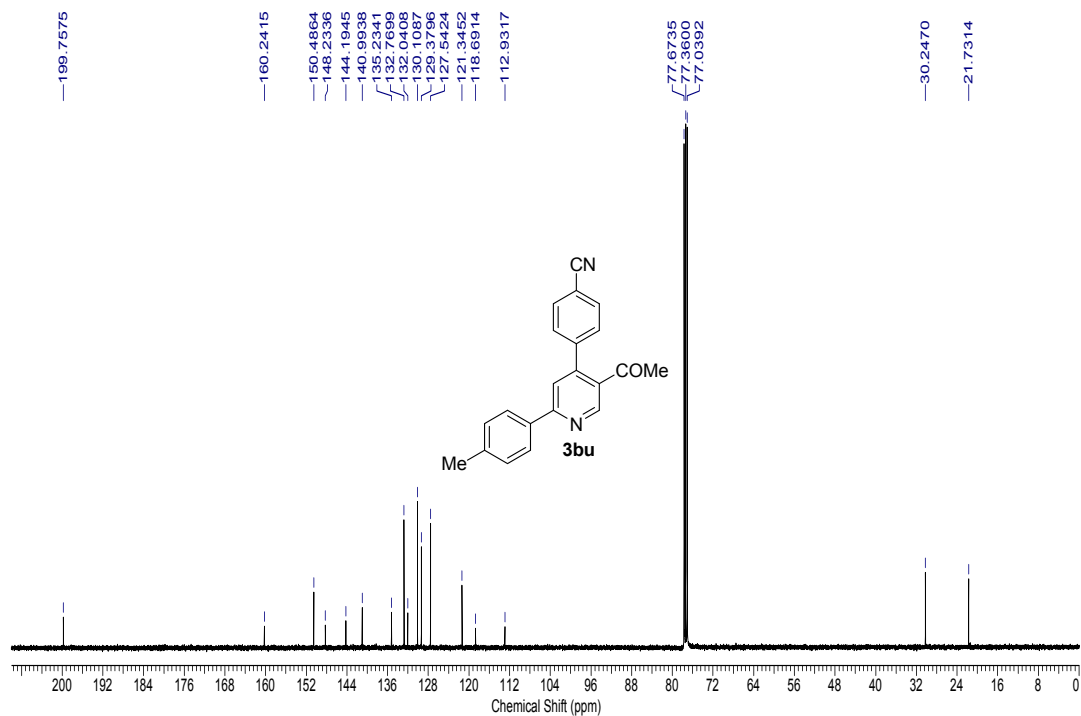

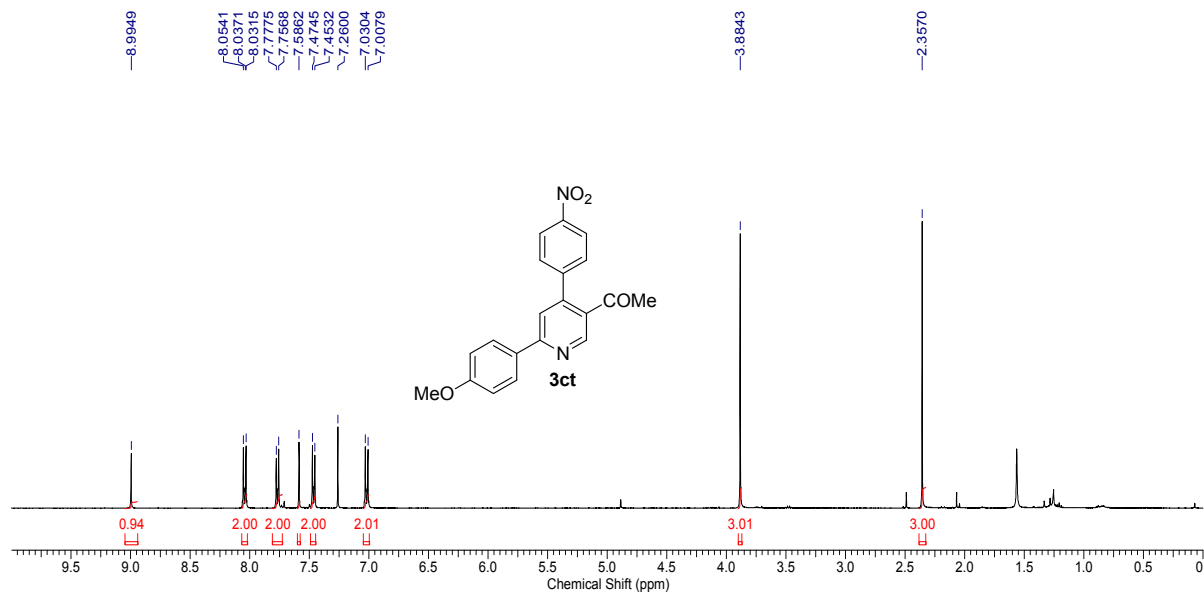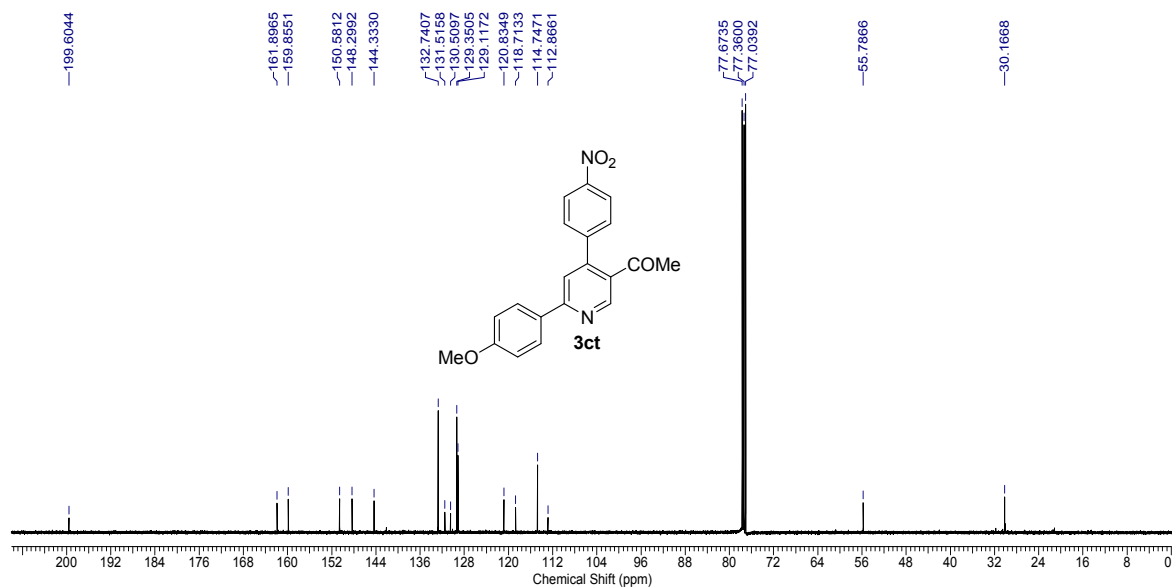

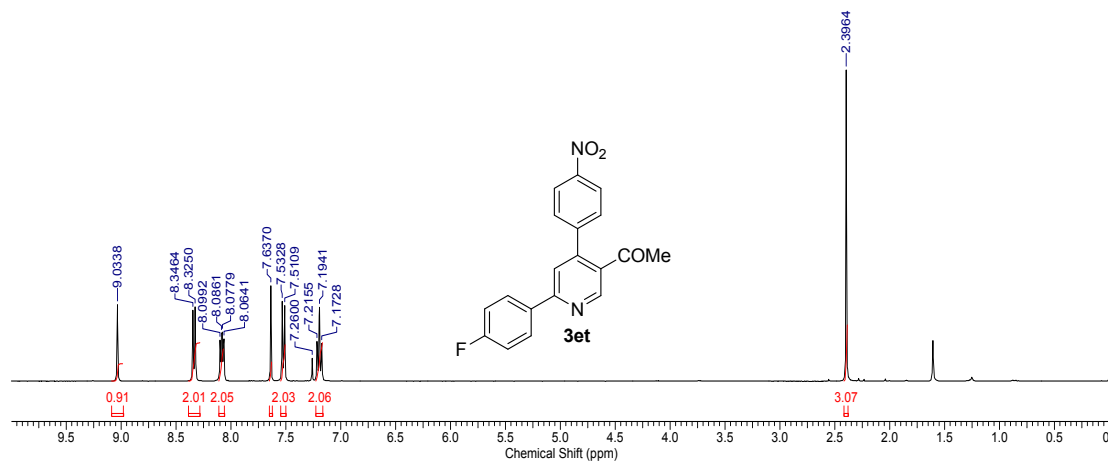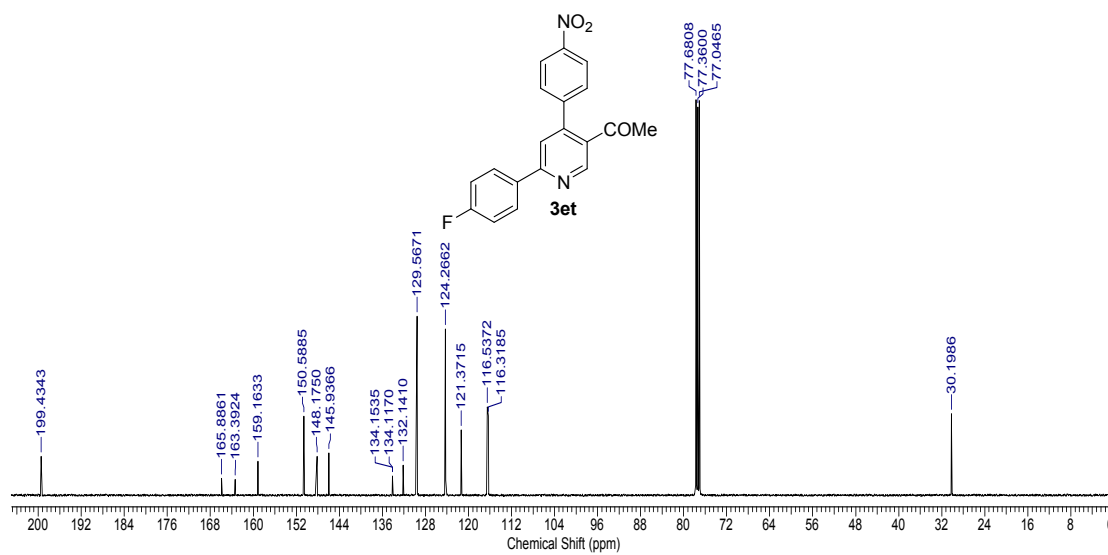

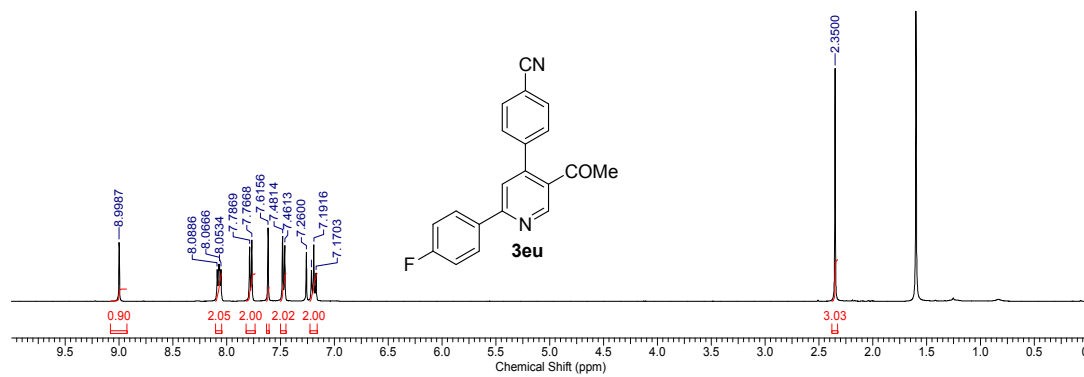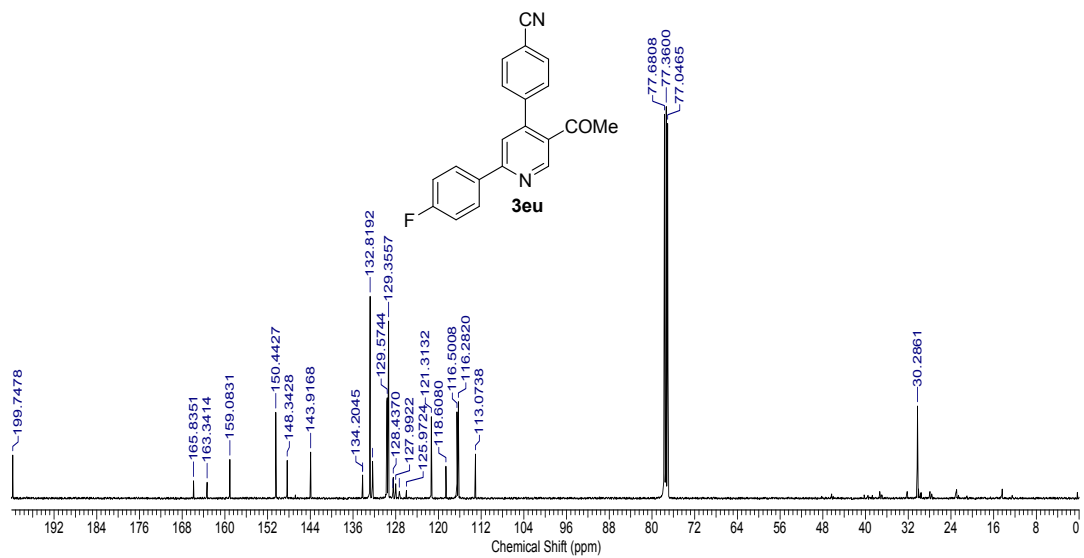



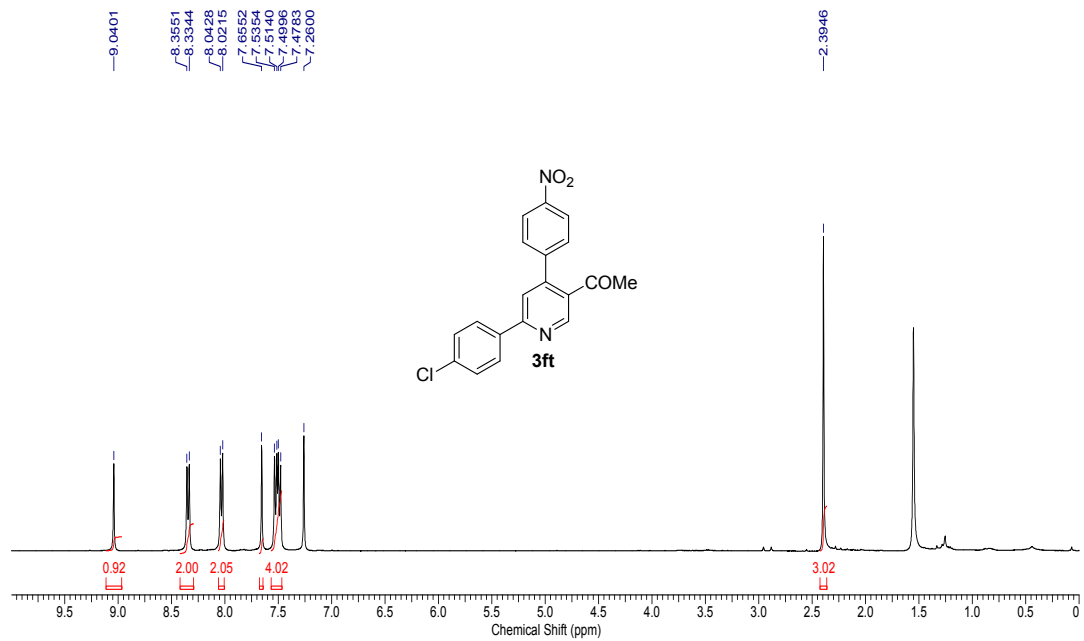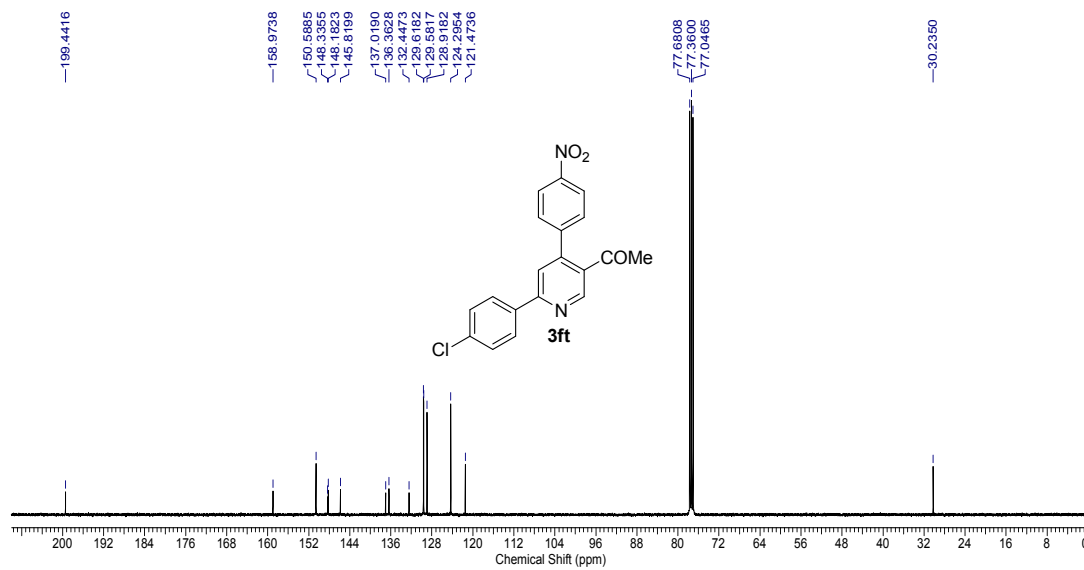

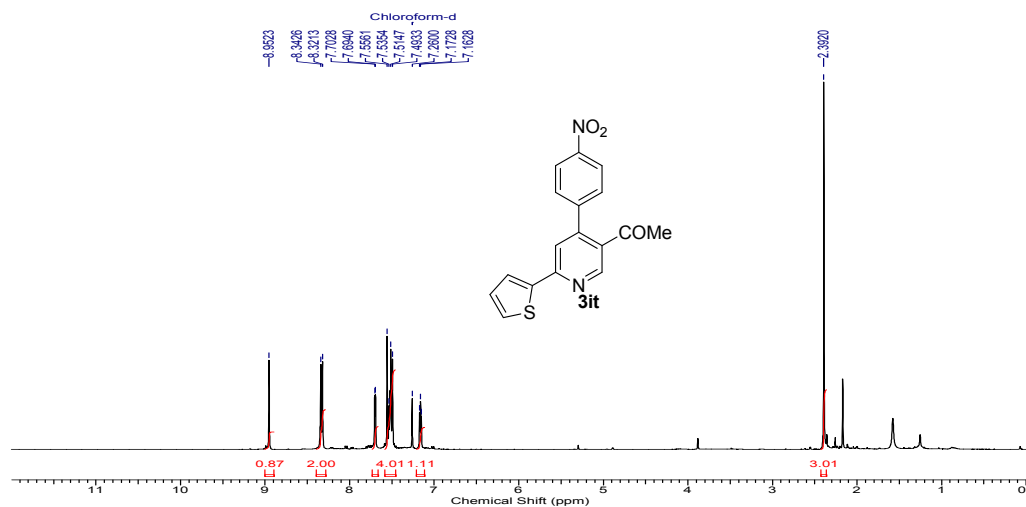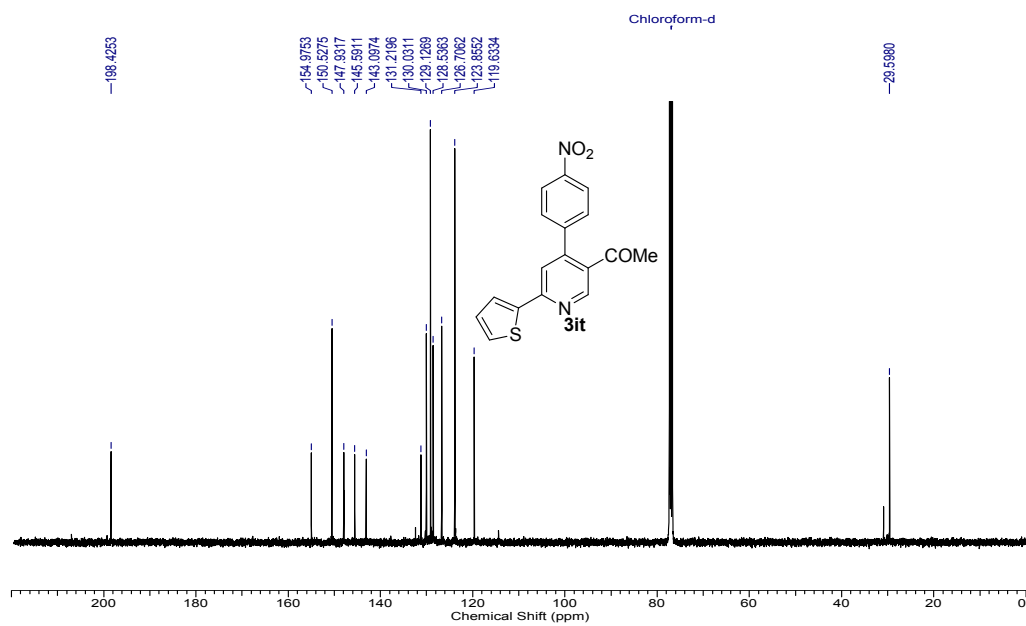

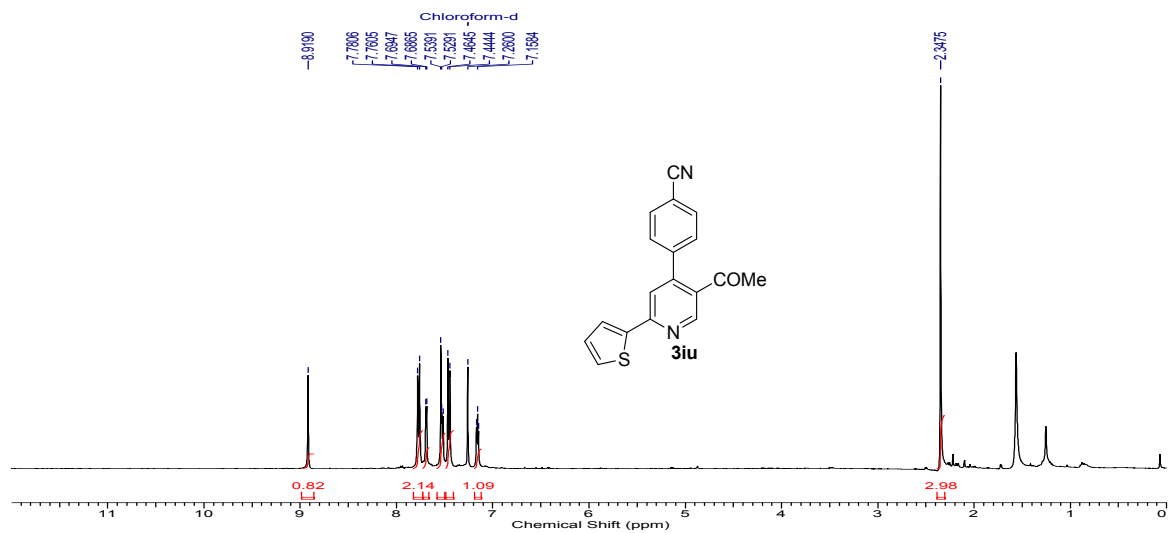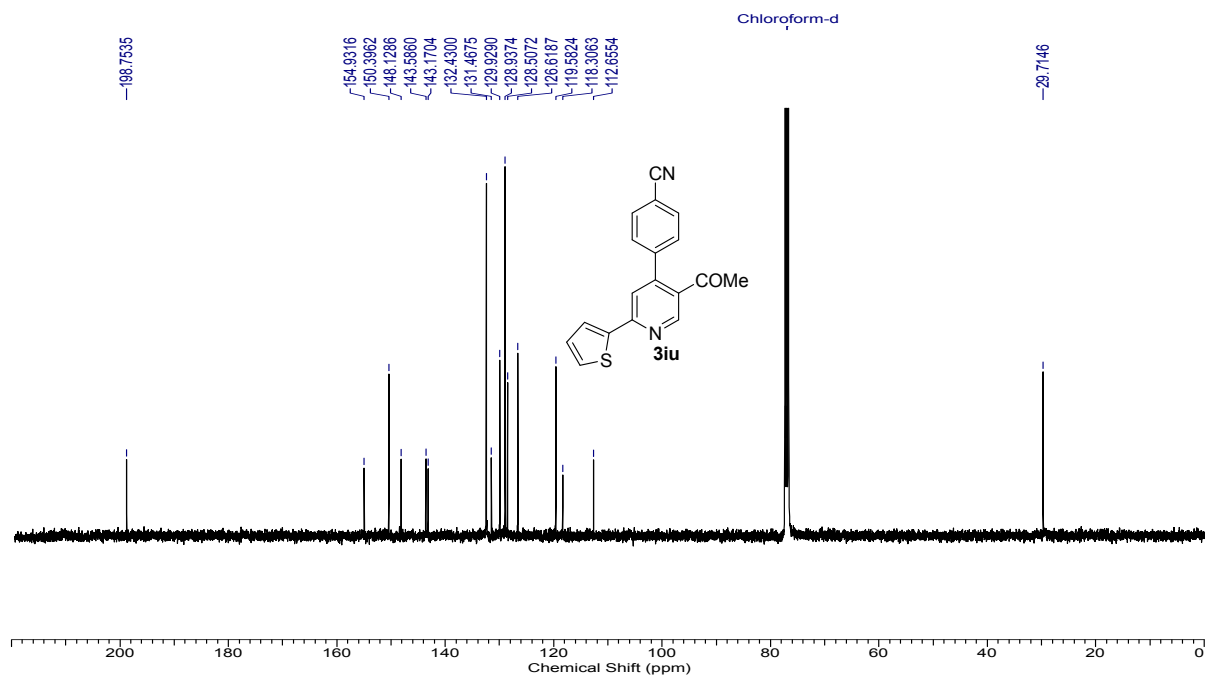

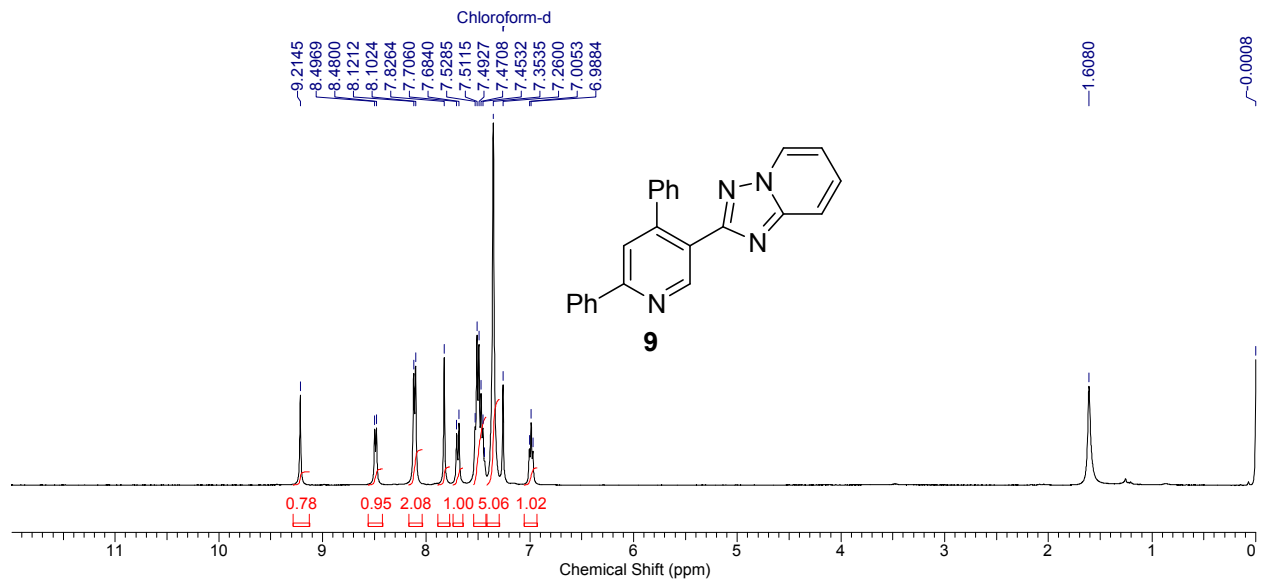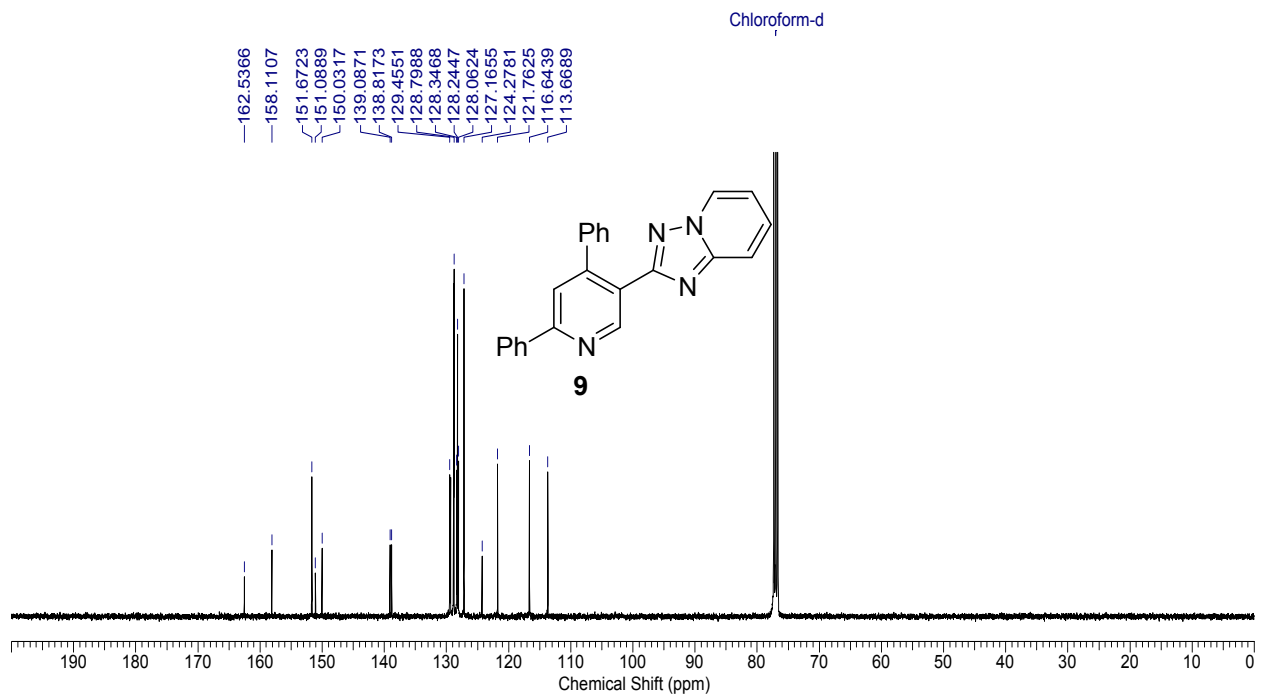

Supplement: c7ob00240h1.pdf [file c7ob00240h1.pdf]
